# Supplementary material for: Molecular Switches at the Synapse Emerge from Receptor and Kinase Traffic
Source: PubMed Central journal article supplement (PMC1185646; doi:10.1371/journal.pcbi.0010020), 2005-07-29
Supplement: pcbi.0010020.sd001.pdf [file pcbi.0010020.sd001.pdf]

A. Model Parameters for basic synaptic traffic model, Models 0 and Model 1. Almost all reactions are identical. Five reactions indicated in the AMPAR section have zero rates in model 0.

Main pathways: AMPA receptor (AMPA), Calcium Calmodulin type II Kinase (CaMKII), Calmodulin (CaM), Inhibitor 1 (I1), Protein phosphatase 2 B (PP2B), Adenylyl Cyclase (AC) Protein Kinase A (PKA).

Concentration units: uM (micromolar) for rate constants presented as Kf, Kb, Km

#/cell for rate constants presented as kf, kb, k1, k2, k3. This formulation of rates may depend on cellular volume.

Some reactions represent traffic between compartments of different volumes. In these cases, any concentration units should be used with care. The #/cell units are preferable in such cases as they are unambiguous.

Time units: Seconds in all cases.

Total Volume of Synapse = 0.1 femtoliters (fl)

Volume of cytosolic portion = 0.09 fl

Volume of Postsynaptic Density (PSD) = 0.01 fl

The enzyme rates are related as follows:

$Km = (k2 + k3)/k1$  (after conversion of units)

$Kcat = k3$ .

Ratio =  $k2/k3$

Initial concentrations (Colnit) are mostly zero, except for a few key molecules.

There is a flag for 'buffered' in the molecule concentration table. When this flag is zero the molecule concentrations are computed according to the reaction equations. If the flag is one the molecule concentration is held fixed to its initial concentration.

For clarity, the model is organized into 'groups' which roughly correspond to individual pathways. The '/kinetics' group is a set of shared molecules interacting with more than one pathway. The entire model scheme is then repeated as composite tables for molecules, reactions and enzymes.

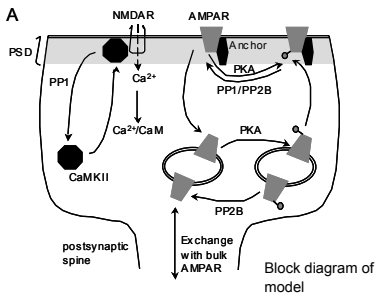

Concentration units: uM  
 Time units: sec  
 Default Volume (m<sup>3</sup>) : 9e-20

Equations for group /kinetics

Reactions for group /kinetics

| Reaction                   | kf                  | kb                  | Kf                  | Kb                  |
|----------------------------|---------------------|---------------------|---------------------|---------------------|
| PKC-control <=> PKC-active | 2.5 s <sup>-1</sup> | 2.5 s <sup>-1</sup> | 2.5 s <sup>-1</sup> | 2.5 s <sup>-1</sup> |
| Ca_control_cyt <=> Ca      | 100 s <sup>-1</sup> | 100 s <sup>-1</sup> | 100 s <sup>-1</sup> | 100 s <sup>-1</sup> |
| Ca_control_PSD <=> Ca-PSD  | 100 s <sup>-1</sup> | 100 s <sup>-1</sup> | 100 s <sup>-1</sup> | 100 s <sup>-1</sup> |

Enzymes for group /kinetics

| Enzyme-reaction                                                 | k1                                         | k2                   | k3                   | Km        | kcat                 | ratio  |
|-----------------------------------------------------------------|--------------------------------------------|----------------------|----------------------|-----------|----------------------|--------|
| neurogranin ---PKC-active--> neurogranin*                       | 0.0018889 # <sup>-1</sup> .s <sup>-1</sup> | 2.34 s <sup>-1</sup> | 0.58 s <sup>-1</sup> | 28.627 uM | 0.58 s <sup>-1</sup> | 4.0345 |
| neurogranin-CaM ---PKC-active--> CaM + neurogranin*             | 0.0011333 # <sup>-1</sup> .s <sup>-1</sup> | 1.4 s <sup>-1</sup>  | 0.35 s <sup>-1</sup> | 28.596 uM | 0.35 s <sup>-1</sup> | 4      |
| AC2 ---PKC-active--> AC2*                                       | 0.0111111 # <sup>-1</sup> .s <sup>-1</sup> | 16 s <sup>-1</sup>   | 4 s <sup>-1</sup>    | 33.334 uM | 4 s <sup>-1</sup>    | 4      |
| neurogranin_PSD ---PKC-active--> neurogranin*_PSD               | 0.0018889 # <sup>-1</sup> .s <sup>-1</sup> | 2.34 s <sup>-1</sup> | 0.58 s <sup>-1</sup> | 28.627 uM | 0.58 s <sup>-1</sup> | 4.0345 |
| neurogranin-CaM_PSD ---PKC-active--> CaM-PSD + neurogranin*_PSD | 0.0011333 # <sup>-1</sup> .s <sup>-1</sup> | 1.4 s <sup>-1</sup>  | 0.35 s <sup>-1</sup> | 28.596 uM | 0.35 s <sup>-1</sup> | 4      |

Pools for group /kinetics

| name           | InitialConc | buffered | Volume  |
|----------------|-------------|----------|---------|
| Ca             | 0.08 uM     | 0        | 0.09 fl |
| Ca-PSD         | 0.08 uM     | 0        | 0.01 fl |
| PKC-active     | 0.1 uM      | 0        | 0.09 fl |
| PKC-control    | 0.1 uM      | 1        | 0.09 fl |
| Ca_control_cyt | 0.08 uM     | 1        | 0.09 fl |
| Ca_control_PSD | 0.08 uM     | 1        | 0.01 fl |

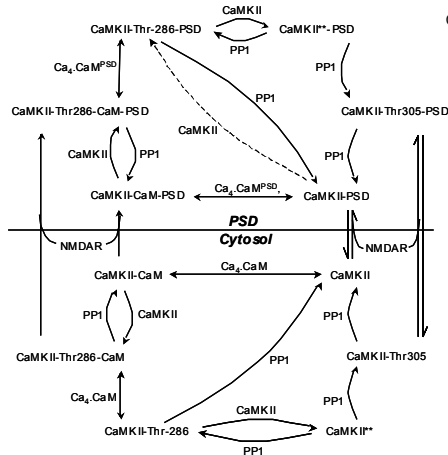

CaMKII reactions

Reactions for group /kinetics/CaMKII

| Reaction                                                  | kf                | kb              | Kf                 | Kb               |
|-----------------------------------------------------------|-------------------|-----------------|--------------------|------------------|
| CaM-Ca4 + CaMKII <=> CaMKII-CaM                           | 0.92592 #^-1.s^-1 | 5 s^-1          | 50 uM^-1.s^-1      | 5 s^-1           |
| CaMKII-thr286 + CaM-Ca4 <=> CaMKII-thr286-CaM             | 18.522 #^-1.s^-1  | 0.1 s^-1        | 1000.2 uM^-1.s^-1  | 0.1 s^-1         |
| CaMKII-thr305-PSD <=> CaMKII-thr305 + NMDAR               | 0.3 s^-1          | 1e-05 #^-1.s^-1 | 0.3 s^-1           | 6e-05 uM^-1.s^-1 |
| CaMKII-PSD <=> CaMKII + NMDAR                             | 0.3 s^-1          | 1e-05 #^-1.s^-1 | 0.3 s^-1           | 6e-05 uM^-1.s^-1 |
| CaMKII-CaM + NMDAR <=> CaMKII-CaM-PSD                     | 2e-05 #^-1.s^-1   | 0 s^-1          | 0.00108 uM^-1.s^-1 | 0 s^-1           |
| CaMKII-thr286-CaM + NMDAR <=> CaMKII-thr286-CaM-PSD       | 2e-05 #^-1.s^-1   | 0 s^-1          | 0.00108 uM^-1.s^-1 | 0 s^-1           |
| basal_CaMKII_PSD_control <=> basal_CaMKII_PSD             | 1 s^-1            | 1 s^-1          | 1 s^-1             | 1 s^-1           |
| CaMKII-CaM-PSD <=> CaM-Ca4-PSD + CaMKII-PSD               | 5 s^-1            | 0 #^-1.s^-1     | 5 s^-1             | 0 uM^-1.s^-1     |
| CaMKII-PSD + CaM-Ca4-PSD <=> CaMKII-CaM-PSD               | 8.3333 #^-1.s^-1  | 0 s^-1          | 50 uM^-1.s^-1      | 0 s^-1           |
| CaMKII-thr286-PSD + CaM-Ca4-PSD <=> CaMKII-thr286-CaM-PSD | 166.67 #^-1.s^-1  | 0.1 s^-1        | 1000 uM^-1.s^-1    | 0.1 s^-1         |

Enzymes for group /kinetics/CaMKII

| Enzyme-reaction                                              | k1                   | k2      | k3       | Km        | kcat     | ratio |
|--------------------------------------------------------------|----------------------|---------|----------|-----------|----------|-------|
| CaMKII-thr286 --tot_CaM_CaMKII--> CaMKII**                   | 0.0048904 #^-1.s^-1  | 24 s^-1 | 6 s^-1   | 113.6 uM  | 6 s^-1   | 4     |
| CaMKII-CaM --tot_CaM_CaMKII--> CaMKII-thr286-CaM             | 0.00040753 #^-1.s^-1 | 2 s^-1  | 0.5 s^-1 | 113.6 uM  | 0.5 s^-1 | 4     |
| CaMKII-thr286 --tot_autonomous_CaMKII--> CaMKII**            | 0.0031746 #^-1.s^-1  | 24 s^-1 | 6 s^-1   | 175 uM    | 6 s^-1   | 4     |
| CaMKII-CaM --tot_autonomous_CaMKII--> CaMKII-thr286-CaM      | 0.00026456 #^-1.s^-1 | 2 s^-1  | 0.5 s^-1 | 174.99 uM | 0.5 s^-1 | 4     |
| CaMKII-thr286-PSD --tot-auto-PSD--> CaMKII**                 | 0.04 #^-1.s^-1       | 24 s^-1 | 6 s^-1   | 125 uM    | 6 s^-1   | 4     |
| CaMKII-CaM-PSD --tot-auto-PSD--> CaMKII-thr286-CaM-PSD       | 0.0033333 #^-1.s^-1  | 2 s^-1  | 0.5 s^-1 | 125 uM    | 0.5 s^-1 | 4     |
| A845*_B845* --actCaMKII-PSD--> A831*845*_B845*               | 0.0046296 #^-1.s^-1  | 2 s^-1  | 0.5 s^-1 | 90.001 uM | 0.5 s^-1 | 4     |
| A_B845* --actCaMKII-PSD--> A831*_B845*                       | 0.0046296 #^-1.s^-1  | 2 s^-1  | 0.5 s^-1 | 90.001 uM | 0.5 s^-1 | 4     |
| A845*_B --actCaMKII-PSD--> A831*845*_B                       | 0.0046296 #^-1.s^-1  | 2 s^-1  | 0.5 s^-1 | 90.001 uM | 0.5 s^-1 | 4     |
| A_B --actCaMKII-PSD--> A831*_B                               | 0.0046296 #^-1.s^-1  | 2 s^-1  | 0.5 s^-1 | 90.001 uM | 0.5 s^-1 | 4     |
| A845*_B845* --actCaMKII-PSD--> A845*_B831*845*               | 0.0046296 #^-1.s^-1  | 2 s^-1  | 0.5 s^-1 | 90.001 uM | 0.5 s^-1 | 4     |
| A_B845* --actCaMKII-PSD--> A_B831*845*                       | 0.0046296 #^-1.s^-1  | 2 s^-1  | 0.5 s^-1 | 90.001 uM | 0.5 s^-1 | 4     |
| A845*_B --actCaMKII-PSD--> A845*_B831*                       | 0.0046296 #^-1.s^-1  | 2 s^-1  | 0.5 s^-1 | 90.001 uM | 0.5 s^-1 | 4     |
| A_B --actCaMKII-PSD--> A_B831*                               | 0.0046296 #^-1.s^-1  | 2 s^-1  | 0.5 s^-1 | 90.001 uM | 0.5 s^-1 | 4     |
| A845*_B831*845* --actCaMKII-PSD--> A835*845*_B835*845*       | 0.0046296 #^-1.s^-1  | 2 s^-1  | 0.5 s^-1 | 90.001 uM | 0.5 s^-1 | 4     |
| A_B831*845* --actCaMKII-PSD--> A831*_B831*845*               | 0.0046296 #^-1.s^-1  | 2 s^-1  | 0.5 s^-1 | 90.001 uM | 0.5 s^-1 | 4     |
| A845*_B831* --actCaMKII-PSD--> A831*845*_B831*               | 0.0046296 #^-1.s^-1  | 2 s^-1  | 0.5 s^-1 | 90.001 uM | 0.5 s^-1 | 4     |
| A_B831* --actCaMKII-PSD--> A831*_B831*                       | 0.0046296 #^-1.s^-1  | 2 s^-1  | 0.5 s^-1 | 90.001 uM | 0.5 s^-1 | 4     |
| A831*845*_B845* --actCaMKII-PSD--> A835*845*_B835*845*       | 0.0046296 #^-1.s^-1  | 2 s^-1  | 0.5 s^-1 | 90.001 uM | 0.5 s^-1 | 4     |
| A831*_B845* --actCaMKII-PSD--> A831*_B831*845*               | 0.0046296 #^-1.s^-1  | 2 s^-1  | 0.5 s^-1 | 90.001 uM | 0.5 s^-1 | 4     |
| A831*845*_B --actCaMKII-PSD--> A831*845*_B831*               | 0.0046296 #^-1.s^-1  | 2 s^-1  | 0.5 s^-1 | 90.001 uM | 0.5 s^-1 | 4     |
| A831*_B --actCaMKII-PSD--> A831*_B831*                       | 0.0046296 #^-1.s^-1  | 2 s^-1  | 0.5 s^-1 | 90.001 uM | 0.5 s^-1 | 4     |
| CaMKII-thr286-PSD --tot-CaM-CaMKII-PSD--> CaMKII**           | 0.061599 #^-1.s^-1   | 24 s^-1 | 6 s^-1   | 81.17 uM  | 6 s^-1   | 4     |
| CaMKII-CaM-PSD --tot-CaM-CaMKII-PSD--> CaMKII-thr286-CaM-PSD | 0.0051333 #^-1.s^-1  | 2 s^-1  | 0.5 s^-1 | 81.169 uM | 0.5 s^-1 | 4     |

Pools for group /kinetics/CaMKII

| name                     | InitialConc | buffered | Volume  |
|--------------------------|-------------|----------|---------|
| CaMKII                   | 20 uM       | 0        | 0.09 fl |
| CaMKII-CaM               | 0 uM        | 0        | 0.09 fl |
| CaMKII-thr286-CaM        | 0 uM        | 0        | 0.09 fl |
| CaMKII**                 | 0 uM        | 0        | 0.09 fl |
| CaMKII-thr286            | 0 uM        | 0        | 0.09 fl |
| tot_CaM_CaMKII           | 0 uM        | 0        | 0.09 fl |
| tot_autonomous_CaMKII    | 2 uM        | 0        | 0.09 fl |
| CaMK-thr305              | 0 uM        | 0        | 0.09 fl |
| tot_CaMKII_cyt           | 22 uM       | 0        | 0.09 fl |
| act_CaMKII_cyt           | 2 uM        | 0        | 0.09 fl |
| basal_CaMKII_cyt         | 2 uM        | 1        | 0.09 fl |
| basal_CaMKII_PSD_control | 2 uM        | 1        | 0.01 fl |
| CaMKII-thr305-PSD        | 0 uM        | 0        | 0.01 fl |
| CaMKII**                 | 0 uM        | 0        | 0.01 fl |
| CaMKII-PSD               | 0 uM        | 0        | 0.01 fl |
| NMDAR                    | 120 uM      | 0        | 0.01 fl |
| CaMKII-thr286-PSD        | 0 uM        | 0        | 0.01 fl |
| CaMKII-CaM-PSD           | 0 uM        | 0        | 0.01 fl |
| CaMKII-thr286-CaM-PSD    | 0 uM        | 0        | 0.01 fl |
| tot-auto-PSD             | 2 uM        | 0        | 0.01 fl |
| basal_CaMKII_PSD         | 2 uM        | 0        | 0.01 fl |
| tot_CaMKII_PSD           | 2 uM        | 0        | 0.01 fl |
| actCaMKII-PSD            | 2 uM        | 0        | 0.01 fl |
| tot-CaM-CaMKII-PSD       | 0 uM        | 0        | 0.01 fl |
| 286P-PSD                 | 0 uM        | 0        | 0.01 fl |

CaM reactions

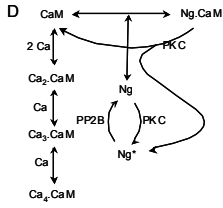

Equations for group /kinetics/CaM  
Reactions for group /kinetics/CaM

| Reaction                                             | kf                  | kb      | Kf                 | Kb      |                |
|------------------------------------------------------|---------------------|---------|--------------------|---------|----------------|
| CaM + 2 Ca <====> CaM-TR2-Ca2                        | 0.024691 #^-2.s^-1  | 72 s^-1 | 71.999 uM^-2.s^-1  | 72 s^-1 |                |
| CaM-TR2-Ca2 + Ca <====> CaM-Ca3                      | 0.066667 #^-1.s^-1  | 10 s^-1 | 3.6 uM^-1.s^-1     | 10 s^-1 |                |
| neurogranin + CaM <====> neurogranin-CaM             | 0.0055556 #^-1.s^-1 | 1 s^-1  | 0.3 uM^-1.s^-1     | 1 s^-1  |                |
| neurogranin* <====> neurogranin                      | 0.005 s^-1          | 0 s^-1  | 0.005 s^-1         | 0 s^-1  |                |
| CaM-PSD + 2 Ca-PSD <====> CaM-TR2-Ca2-PSD            | 2 #^-2.s^-1         | 72 s^-1 | 72 uM^-2.s^-1      | 72 s^-1 |                |
| CaM-TR2-Ca2-PSD + Ca-PSD <====> CaM-Ca3-PSD          | 0.6 #^-1.s^-1       | 10 s^-1 | 3.6 uM^-1.s^-1     | 10 s^-1 |                |
| CaM-Ca3-PSD + Ca-PSD <====> CaM-Ca4-PSD              | 0.077502 #^-1.s^-1  | 10 s^-1 | 0.46501 uM^-1.s^-1 | 10 s^-1 |                |
| neurogranin_PSD + CaM-PSD <====> neurogranin-CaM_PSD | 0.05 #^-1.s^-1      | 1 s^-1  | 0.3 uM^-1.s^-1     | 1 s^-1  |                |
| neurogranin*_PSD <====> neurogranin_PSD              | 0.005 s^-1          | 0 s^-1  | 0.005 s^-1         | 0 s^-1  |                |
| CaM-Ca3 + Ca <====> CaM-Ca4                          | 0.0086111 #^-1.s^-1 | 10 s^-1 | 0.465 uM^-1.s^-1   | 10 s^-1 |                |
| CaM-Ca4-PSD <====> CaM-Ca4                           | 540 s^-1            | 60 s^-1 | 540 s^-1           | 60 s^-1 | Traffic Reach. |

Pools for group /kinetics/CaM

| name                | InitialConc | buffered | Volume  |
|---------------------|-------------|----------|---------|
| CaM                 | 26.333 uM   | 0        | 0.09 fl |
| neurogranin-CaM     | 0 uM        | 0        | 0.09 fl |
| neurogranin*        | 0 uM        | 0        | 0.09 fl |
| neurogranin         | 10 uM       | 0        | 0.09 fl |
| CaM-PSD             | 26.333 uM   | 0        | 0.01 fl |
| neurogranin-CaM_PSD | 0 uM        | 0        | 0.01 fl |
| neurogranin_PSD     | 10 uM       | 0        | 0.01 fl |
| neurogranin*_PSD    | 0 uM        | 0        | 0.01 fl |
| CaM-TR2-Ca2         | 0 uM        | 0        | 0.09 fl |
| CaM-Ca3             | 0 uM        | 0        | 0.09 fl |
| CaM-Ca4-PSD         | 0 uM        | 0        | 0.01 fl |
| CaM-Ca3-PSD         | 0 uM        | 0        | 0.01 fl |
| CaM-TR2-Ca2-PSD     | 0 uM        | 0        | 0.01 fl |
| CaM-Ca4             | 0 uM        | 0        | 0.09 fl |

PP1 reactions

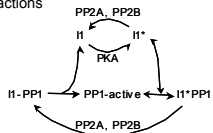

Equations for group /kinetics/PP1

Reactions for group /kinetics/PP1

Reaction

| Reaction                     | kf               | kb          | Kf                | Kb           |
|------------------------------|------------------|-------------|-------------------|--------------|
| I1* + PP1-active <=> PP1-I1* | 9.2589 #^-1.s^-1 | 0.1 s^-1    | 499.98 uM^-1.s^-1 | 0.1 s^-1     |
| PP1-I1 <=> PP1-active + I1   | 1 s^-1           | 0 #^-1.s^-1 | 1 s^-1            | 0 uM^-1.s^-1 |

Enzymes for group /kinetics/PP1

Enzyme-reaction

| Enzyme-reaction                              | k1                 | k2          | k3       | Km       | kcat     | ratio  |
|----------------------------------------------|--------------------|-------------|----------|----------|----------|--------|
| I1* --PP2A--> I1                             | 0.01196 #^-1.s^-1  | 8.3334 s^-1 | 2 s^-1   | 16 uM    | 2 s^-1   | 4.1667 |
| PP1-I1* --PP2A--> PP1-I1                     | 0.01196 #^-1.s^-1  | 8.3334 s^-1 | 2 s^-1   | 16 uM    | 2 s^-1   | 4.1667 |
| I1* --PP2A--> I1                             | 0.01196 #^-1.s^-1  | 8.3334 s^-1 | 2 s^-1   | 16 uM    | 2 s^-1   | 4.1667 |
| PP1-I1* --PP2A--> PP1-I1                     | 0.01196 #^-1.s^-1  | 8.3334 s^-1 | 2 s^-1   | 16 uM    | 2 s^-1   | 4.1667 |
| CaMKII-thr286-CaM --PP1-active--> CaMKII-CaM | 0.045397 #^-1.s^-1 | 10 s^-1     | 2.5 s^-1 | 5.099 uM | 2.5 s^-1 | 4      |
| CaMKII-thr286 --PP1-active--> CaMKII         | 0.045397 #^-1.s^-1 | 10 s^-1     | 2.5 s^-1 | 5.099 uM | 2.5 s^-1 | 4      |
| CaMKII*** --PP1-active--> CaMKII-thr286      | 0.045397 #^-1.s^-1 | 10 s^-1     | 2.5 s^-1 | 5.099 uM | 2.5 s^-1 | 4      |
| CaMKII*** --PP1-active--> CaMKII-thr305      | 0.045397 #^-1.s^-1 | 10 s^-1     | 2.5 s^-1 | 5.099 uM | 2.5 s^-1 | 4      |
| CaMK-thr305 --PP1-active--> CaMKII           | 0.045397 #^-1.s^-1 | 10 s^-1     | 2.5 s^-1 | 5.099 uM | 2.5 s^-1 | 4      |

Pools for group /kinetics/PP1

name

| name       | InitialConc | buffered | Volume  |
|------------|-------------|----------|---------|
| I1         | 1.8 uM      | 0        | 0.09 fl |
| I1*        | 0 uM        | 0        | 0.09 fl |
| PP1-I1*    | 0 uM        | 0        | 0.09 fl |
| PP1-I1     | 0 uM        | 0        | 0.09 fl |
| PP2A       | 0.11111 uM  | 0        | 0.09 fl |
| PP1-active | 1.8 uM      | 0        | 0.09 fl |

Equations for group /kinetics/PP1\_PSD

Reactions for group /kinetics/PP1\_PSD

Reaction

| Reaction                         | kf              | kb          | Kf                | Kb           |
|----------------------------------|-----------------|-------------|-------------------|--------------|
| PP1-I1 <=> I1 + PP1-active_PSD   | 1 s^-1          | 0 #^-1.s^-1 | 1 s^-1            | 0 uM^-1.s^-1 |
| I1* + PP1-active_PSD <=> PP1-I1* | 83.33 #^-1.s^-1 | 0.1 s^-1    | 499.98 uM^-1.s^-1 | 0.1 s^-1     |

Enzymes for group /kinetics/PP1\_PSD

Enzyme-reaction

| Enzyme-reaction                                          | k1                | k2        | k3        | Km         | kcat      | ratio |
|----------------------------------------------------------|-------------------|-----------|-----------|------------|-----------|-------|
| CaMKII-thr286-CaM-PSD --PP1-active_PSD--> CaMKII-CaM-PSD | 1.0417 #^-1.s^-1  | 10 s^-1   | 2.5 s^-1  | 1.9999 uM  | 2.5 s^-1  | 4     |
| CaMKII-thr286-PSD --PP1-active_PSD--> CaMKII-PSD         | 1.0417 #^-1.s^-1  | 10 s^-1   | 2.5 s^-1  | 1.9999 uM  | 2.5 s^-1  | 4     |
| CaMKII***-PSD --PP1-active_PSD--> CaMKII-thr286-PSD      | 0.40857 #^-1.s^-1 | 10 s^-1   | 2.5 s^-1  | 5.0991 uM  | 2.5 s^-1  | 4     |
| CaMKII***-PSD --PP1-active_PSD--> CaMKII-thr305-PSD      | 1.0417 #^-1.s^-1  | 10 s^-1   | 2.5 s^-1  | 1.9999 uM  | 2.5 s^-1  | 4     |
| A845*_B845* --PP1-active_PSD--> A_B845*                  | 0.14583 #^-1.s^-1 | 0.68 s^-1 | 0.17 s^-1 | 0.97145 uM | 0.17 s^-1 | 4     |
| A845*_B845* --PP1-active_PSD--> A845*_B                  | 0.14583 #^-1.s^-1 | 0.68 s^-1 | 0.17 s^-1 | 0.97145 uM | 0.17 s^-1 | 4     |
| A845*_B --PP1-active_PSD--> A_B                          | 0.14583 #^-1.s^-1 | 0.68 s^-1 | 0.17 s^-1 | 0.97145 uM | 0.17 s^-1 | 4     |
| A_B845* --PP1-active_PSD--> A_B                          | 0.14583 #^-1.s^-1 | 0.68 s^-1 | 0.17 s^-1 | 0.97145 uM | 0.17 s^-1 | 4     |
| A831*845*_B845* --PP1-active_PSD--> A831*_B845*          | 0.14583 #^-1.s^-1 | 0.68 s^-1 | 0.17 s^-1 | 0.97145 uM | 0.17 s^-1 | 4     |
| A831*845*_B845* --PP1-active_PSD--> A831*845*_B          | 0.14583 #^-1.s^-1 | 0.68 s^-1 | 0.17 s^-1 | 0.97145 uM | 0.17 s^-1 | 4     |
| A831*_B845* --PP1-active_PSD--> A831*_B                  | 0.14583 #^-1.s^-1 | 0.68 s^-1 | 0.17 s^-1 | 0.97145 uM | 0.17 s^-1 | 4     |
| A831*845*_B --PP1-active_PSD--> A831*_B                  | 0.14583 #^-1.s^-1 | 0.68 s^-1 | 0.17 s^-1 | 0.97145 uM | 0.17 s^-1 | 4     |
| A831*845*_B845* --PP1-active_PSD--> A845*_B845*          | 0.14583 #^-1.s^-1 | 1.4 s^-1  | 0.35 s^-1 | 2 uM       | 0.35 s^-1 | 4     |
| A831*_B845* --PP1-active_PSD--> A_B845*                  | 0.14583 #^-1.s^-1 | 1.4 s^-1  | 0.35 s^-1 | 2 uM       | 0.35 s^-1 | 4     |
| A831*845*_B --PP1-active_PSD--> A845*_B                  | 0.14583 #^-1.s^-1 | 1.4 s^-1  | 0.35 s^-1 | 2 uM       | 0.35 s^-1 | 4     |
| A831*_B --PP1-active_PSD--> A_B                          | 0.14583 #^-1.s^-1 | 1.4 s^-1  | 0.35 s^-1 | 2 uM       | 0.35 s^-1 | 4     |
| A845*_B831*845* --PP1-active_PSD--> A_B831*845*          | 0.14583 #^-1.s^-1 | 0.68 s^-1 | 0.17 s^-1 | 0.97145 uM | 0.17 s^-1 | 4     |
| A845*_B831*845* --PP1-active_PSD--> A845*_B831*          | 0.14583 #^-1.s^-1 | 0.68 s^-1 | 0.17 s^-1 | 0.97145 uM | 0.17 s^-1 | 4     |
| A_B831*845* --PP1-active_PSD--> A_B831*                  | 0.14583 #^-1.s^-1 | 0.68 s^-1 | 0.17 s^-1 | 0.97145 uM | 0.17 s^-1 | 4     |
| A845*_B831* --PP1-active_PSD--> A_B831*                  | 0.14583 #^-1.s^-1 | 0.68 s^-1 | 0.17 s^-1 | 0.97145 uM | 0.17 s^-1 | 4     |
| A835*845*_B835*845* --PP1-active_PSD--> A831*_B831*845*  | 0.14583 #^-1.s^-1 | 0.68 s^-1 | 0.17 s^-1 | 0.97145 uM | 0.17 s^-1 | 4     |
| A835*845*_B835*845* --PP1-active_PSD--> A831*845*_B831*  | 0.14583 #^-1.s^-1 | 0.68 s^-1 | 0.17 s^-1 | 0.97145 uM | 0.17 s^-1 | 4     |
| A831*_B831*845* --PP1-active_PSD--> A831*_B831*          | 0.14583 #^-1.s^-1 | 0.68 s^-1 | 0.17 s^-1 | 0.97145 uM | 0.17 s^-1 | 4     |
| A831*845*_B831* --PP1-active_PSD--> A831*_B831*          | 0.14583 #^-1.s^-1 | 0.68 s^-1 | 0.17 s^-1 | 0.97145 uM | 0.17 s^-1 | 4     |
| A_B831*845* --PP1-active_PSD--> A_B845*                  | 0.14583 #^-1.s^-1 | 1.4 s^-1  | 0.35 s^-1 | 2 uM       | 0.35 s^-1 | 4     |
| A845*_B831*845* --PP1-active_PSD--> A845*_B845*          | 0.14583 #^-1.s^-1 | 1.4 s^-1  | 0.35 s^-1 | 2 uM       | 0.35 s^-1 | 4     |
| A845*_B831* --PP1-active_PSD--> A845*_B                  | 0.14583 #^-1.s^-1 | 1.4 s^-1  | 0.35 s^-1 | 2 uM       | 0.35 s^-1 | 4     |
| A_B831* --PP1-active_PSD--> A_B                          | 0.14583 #^-1.s^-1 | 1.4 s^-1  | 0.35 s^-1 | 2 uM       | 0.35 s^-1 | 4     |
| A835*845*_B835*845* --PP1-active_PSD--> A845*_B831*845*  | 0.14583 #^-1.s^-1 | 1.4 s^-1  | 0.35 s^-1 | 2 uM       | 0.35 s^-1 | 4     |
| A831*_B831*845* --PP1-active_PSD--> A_B831*845*          | 0.14583 #^-1.s^-1 | 1.4 s^-1  | 0.35 s^-1 | 2 uM       | 0.35 s^-1 | 4     |
| A831*845*_B831* --PP1-active_PSD--> A845*_B831*          | 0.14583 #^-1.s^-1 | 1.4 s^-1  | 0.35 s^-1 | 2 uM       | 0.35 s^-1 | 4     |
| A831*_B831* --PP1-active_PSD--> A_B831*                  | 0.14583 #^-1.s^-1 | 1.4 s^-1  | 0.35 s^-1 | 2 uM       | 0.35 s^-1 | 4     |
| A835*845*_B835*845* --PP1-active_PSD--> A831*845*_B845*  | 0.14583 #^-1.s^-1 | 1.4 s^-1  | 0.35 s^-1 | 2 uM       | 0.35 s^-1 | 4     |
| A831*_B831*845* --PP1-active_PSD--> A831*_B845*          | 0.14583 #^-1.s^-1 | 1.4 s^-1  | 0.35 s^-1 | 2 uM       | 0.35 s^-1 | 4     |
| A831*845*_B831* --PP1-active_PSD--> A831*845*_B          | 0.14583 #^-1.s^-1 | 1.4 s^-1  | 0.35 s^-1 | 2 uM       | 0.35 s^-1 | 4     |
| A831*_B831* --PP1-active_PSD--> A831*_B                  | 0.14583 #^-1.s^-1 | 1.4 s^-1  | 0.35 s^-1 | 2 uM       | 0.35 s^-1 | 4     |
| CaMKII-thr305-PSD --PP1-active_PSD--> CaMKII-PSD         | 0.40857 #^-1.s^-1 | 10 s^-1   | 2.5 s^-1  | 5.0991 uM  | 2.5 s^-1  | 4     |

Pools for group /kinetics/PP1\_PSD

name

| name           | InitialConc | buffered | Volume  |
|----------------|-------------|----------|---------|
| I1             | 4 uM        | 0        | 0.01 fl |
| I1*            | 0 uM        | 0        | 0.01 fl |
| PP1-I1*        | 0 uM        | 0        | 0.01 fl |
| PP1-I1         | 0 uM        | 0        | 0.01 fl |
| PP1-active_PSD | 4 uM        | 0        | 0.01 fl |

PP2B/Calcineurin  
reactions

F

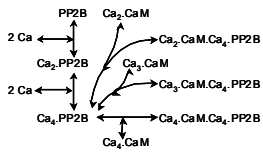

Equations for group /kinetics/PP2B

Reactions for group /kinetics/PP2B

Reaction

| Reaction                               | kf                  | kb     | Kf                | Kb     |
|----------------------------------------|---------------------|--------|-------------------|--------|
| 2 Ca + CaNAB-Ca2 <=> CaNAB-Ca4         | 0.0012346 #^-2.s^-1 | 1 s^-1 | 3.6001 uM^-2.s^-1 | 1 s^-1 |
| CaNAB + 2 Ca <=> CaNAB-Ca2             | 3.4321 #^-2.s^-1    | 1 s^-1 | 10008 uM^-2.s^-1  | 1 s^-1 |
| CaM-Ca4 + CaNAB-Ca4 <=> CaM_Ca_n-CaNAB | 11.111 #^-1.s^-1    | 1 s^-1 | 599.99 uM^-1.s^-1 | 1 s^-1 |

Enzymes for group /kinetics/PP2B

Enzyme-reaction

| Enzyme-reaction                                          | k1                   | k2         | k3         | Km        | kcat       | ratio  |
|----------------------------------------------------------|----------------------|------------|------------|-----------|------------|--------|
| I1* ---CaNAB-Ca4--> I1                                   | 0.00063333 #^-1.s^-1 | 0.136 s^-1 | 0.034 s^-1 | 4.9708 uM | 0.034 s^-1 | 4      |
| I1* ---CaNAB-Ca4-> I1                                    | 0.00063333 #^-1.s^-1 | 0.136 s^-1 | 0.034 s^-1 | 4.9707 uM | 0.034 s^-1 | 4      |
| neurogranin* ---CaM_Ca_n-CaNAB--> neurogranin            | 0.0061778 #^-1.s^-1  | 2.67 s^-1  | 0.67 s^-1  | 10.012 uM | 0.67 s^-1  | 3.9851 |
| I1* ---CaM_Ca_n-CaNAB--> I1                              | 0.0063333 #^-1.s^-1  | 1.36 s^-1  | 0.34 s^-1  | 4.9708 uM | 0.34 s^-1  | 4      |
| PP1-I1* ---CaM_Ca_n-CaNAB--> PP1-I1                      | 0.0063333 #^-1.s^-1  | 1.36 s^-1  | 0.34 s^-1  | 4.9708 uM | 0.34 s^-1  | 4      |
| I1* ---CaM_Ca_n-CaNAB--> I1                              | 0.0063333 #^-1.s^-1  | 1.36 s^-1  | 0.34 s^-1  | 4.9707 uM | 0.34 s^-1  | 4      |
| PP1-I1* ---CaM_Ca_n-CaNAB--> PP1-I1                      | 0.0063333 #^-1.s^-1  | 1.36 s^-1  | 0.34 s^-1  | 4.9707 uM | 0.34 s^-1  | 4      |
| A845*_B ---CaM_Ca_n-CaNAB--> A_B                         | 0.037256 #^-1.s^-1   | 8 s^-1     | 2 s^-1     | 4.9706 uM | 2 s^-1     | 4      |
| A831*845*_B ---CaM_Ca_n-CaNAB--> A831*_B                 | 0.037256 #^-1.s^-1   | 8 s^-1     | 2 s^-1     | 4.9706 uM | 2 s^-1     | 4      |
| A845*_B831* ---CaM_Ca_n-CaNAB--> A_B831*                 | 0.037256 #^-1.s^-1   | 8 s^-1     | 2 s^-1     | 4.9706 uM | 2 s^-1     | 4      |
| A831*845*_B831* ---CaM_Ca_n-CaNAB--> A831*_B831*         | 0.037256 #^-1.s^-1   | 8 s^-1     | 2 s^-1     | 4.9706 uM | 2 s^-1     | 4      |
| A_B845* ---CaM_Ca_n-CaNAB--> A_B                         | 0.037256 #^-1.s^-1   | 8 s^-1     | 2 s^-1     | 4.9706 uM | 2 s^-1     | 4      |
| AA831*_B845* ---CaM_Ca_n-CaNAB--> A831*_B                | 0.037256 #^-1.s^-1   | 8 s^-1     | 2 s^-1     | 4.9706 uM | 2 s^-1     | 4      |
| A_B831*845* ---CaM_Ca_n-CaNAB--> A_B831*                 | 0.037256 #^-1.s^-1   | 8 s^-1     | 2 s^-1     | 4.9706 uM | 2 s^-1     | 4      |
| A831*_B831*845* ---CaM_Ca_n-CaNAB--> A831*_B831*         | 0.037256 #^-1.s^-1   | 8 s^-1     | 2 s^-1     | 4.9706 uM | 2 s^-1     | 4      |
| A845*_B845* ---CaM_Ca_n-CaNAB--> A_B845*                 | 0.037256 #^-1.s^-1   | 8 s^-1     | 2 s^-1     | 4.9706 uM | 2 s^-1     | 4      |
| A831*845*_B845* ---CaM_Ca_n-CaNAB--> AA831*_B845*        | 0.037256 #^-1.s^-1   | 8 s^-1     | 2 s^-1     | 4.9706 uM | 2 s^-1     | 4      |
| A845*_B831*845* ---CaM_Ca_n-CaNAB--> A_B831*845*         | 0.037256 #^-1.s^-1   | 8 s^-1     | 2 s^-1     | 4.9706 uM | 2 s^-1     | 4      |
| A835*845*_B835*845* ---CaM_Ca_n-CaNAB--> A831*_B831*845* | 0.037256 #^-1.s^-1   | 8 s^-1     | 2 s^-1     | 4.9706 uM | 2 s^-1     | 4      |
| A845*_B845* ---CaM_Ca_n-CaNAB--> A845*_B                 | 0.037256 #^-1.s^-1   | 8 s^-1     | 2 s^-1     | 4.9706 uM | 2 s^-1     | 4      |
| A831*845*_B845* ---CaM_Ca_n-CaNAB--> A831*845*_B         | 0.037256 #^-1.s^-1   | 8 s^-1     | 2 s^-1     | 4.9706 uM | 2 s^-1     | 4      |
| A845*_B831*845* ---CaM_Ca_n-CaNAB--> A845*_B831*         | 0.037256 #^-1.s^-1   | 8 s^-1     | 2 s^-1     | 4.9706 uM | 2 s^-1     | 4      |
| A835*845*_B835*845* ---CaM_Ca_n-CaNAB--> A831*845*_B831* | 0.037256 #^-1.s^-1   | 8 s^-1     | 2 s^-1     | 4.9706 uM | 2 s^-1     | 4      |
| A845*_B845* ---CaM_Ca_n-CaNAB--> A845*_B                 | 0.037256 #^-1.s^-1   | 8 s^-1     | 2 s^-1     | 4.9706 uM | 2 s^-1     | 4      |
| A_B845* ---CaM_Ca_n-CaNAB--> A_B                         | 0.037256 #^-1.s^-1   | 8 s^-1     | 2 s^-1     | 4.9706 uM | 2 s^-1     | 4      |
| A845*_B ---CaM_Ca_n-CaNAB--> A_B                         | 0.037256 #^-1.s^-1   | 8 s^-1     | 2 s^-1     | 4.9706 uM | 2 s^-1     | 4      |
| A831*845*_B845* ---CaM_Ca_n-CaNAB--> A831*_B845*         | 0.037256 #^-1.s^-1   | 8 s^-1     | 2 s^-1     | 4.9706 uM | 2 s^-1     | 4      |
| A831*845*_B845* ---CaM_Ca_n-CaNAB--> A831*845*_B         | 0.037256 #^-1.s^-1   | 8 s^-1     | 2 s^-1     | 4.9706 uM | 2 s^-1     | 4      |
| A831*_B845* ---CaM_Ca_n-CaNAB--> A831*_B                 | 0.037256 #^-1.s^-1   | 8 s^-1     | 2 s^-1     | 4.9706 uM | 2 s^-1     | 4      |
| A831*845*_B ---CaM_Ca_n-CaNAB--> A831*_B                 | 0.037256 #^-1.s^-1   | 8 s^-1     | 2 s^-1     | 4.9706 uM | 2 s^-1     | 4      |
| A845*_B831*845* ---CaM_Ca_n-CaNAB--> A_B831*845*         | 0.037256 #^-1.s^-1   | 8 s^-1     | 2 s^-1     | 4.9706 uM | 2 s^-1     | 4      |
| A845*_B831*845* ---CaM_Ca_n-CaNAB--> A845*_B831*         | 0.037256 #^-1.s^-1   | 8 s^-1     | 2 s^-1     | 4.9706 uM | 2 s^-1     | 4      |
| A_B831*845* ---CaM_Ca_n-CaNAB--> A_B831*                 | 0.037256 #^-1.s^-1   | 8 s^-1     | 2 s^-1     | 4.9706 uM | 2 s^-1     | 4      |
| A845*_B831* ---CaM_Ca_n-CaNAB--> A_B831*                 | 0.037256 #^-1.s^-1   | 8 s^-1     | 2 s^-1     | 4.9706 uM | 2 s^-1     | 4      |
| A835*845*_B835*845* ---CaM_Ca_n-CaNAB--> A831*_B831*845* | 0.037256 #^-1.s^-1   | 8 s^-1     | 2 s^-1     | 4.9706 uM | 2 s^-1     | 4      |
| A835*845*_B835*845* ---CaM_Ca_n-CaNAB--> A831*845*_B831* | 0.037256 #^-1.s^-1   | 8 s^-1     | 2 s^-1     | 4.9706 uM | 2 s^-1     | 4      |
| A831*845*_B831* ---CaM_Ca_n-CaNAB--> A831*_B831*         | 0.037256 #^-1.s^-1   | 8 s^-1     | 2 s^-1     | 4.9706 uM | 2 s^-1     | 4      |
| A831*_B831*845* ---CaM_Ca_n-CaNAB--> A831*_B831*         | 0.037256 #^-1.s^-1   | 8 s^-1     | 2 s^-1     | 4.9706 uM | 2 s^-1     | 4      |
| neurogranin*_PSD ---CaM_Ca_n-CaNAB--> neurogranin*_PSD   | 0.0061778 #^-1.s^-1  | 2.67 s^-1  | 0.67 s^-1  | 10.012 uM | 0.67 s^-1  | 3.9851 |

Pools for group /kinetics/PP2B

| name           | InitialConc | buffered | Volume  |
|----------------|-------------|----------|---------|
| CaNAB          | 1 uM        | 0        | 0.09 fl |
| CaNAB-Ca2      | 0 uM        | 0        | 0.09 fl |
| CaNAB-Ca4      | 0 uM        | 0        | 0.09 fl |
| CaM_Ca_n-CaNAB | 0 uM        | 0        | 0.09 fl |

PKA reactions

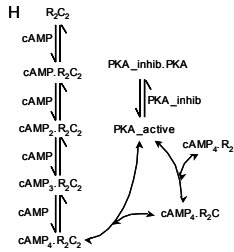

Equations for group /kinetics/PKA

Reactions for group /kinetics/PKA

Reaction

| Reaction                                     | kf               | kb                | Kf                | Kb            |
|----------------------------------------------|------------------|-------------------|-------------------|---------------|
| R2C2 + cAMP <=> R2C2-cAMP                    | 1 #^-1.s^-1      | 33 s^-1           | 54 uM^-1.s^-1     | 33 s^-1       |
| R2C2-cAMP + cAMP <=> R2C2-cAMP2              | 1 #^-1.s^-1      | 33 s^-1           | 54 uM^-1.s^-1     | 33 s^-1       |
| R2C2-cAMP2 + cAMP <=> R2C2-cAMP3             | 1.3889 #^-1.s^-1 | 110 s^-1          | 75.001 uM^-1.s^-1 | 110 s^-1      |
| cAMP + R2C2-cAMP3 <=> R2C2-cAMP4             | 1.3889 #^-1.s^-1 | 32.5 s^-1         | 75.001 uM^-1.s^-1 | 32.5 s^-1     |
| R2C2-cAMP4 <=> PKA-active + R2C-cAMP4        | 60 s^-1          | 0.33333 #^-1.s^-1 | 60 s^-1           | 18 uM^-1.s^-1 |
| R2C-cAMP4 <=> PKA-active + R2-cAMP4          | 60 s^-1          | 0.33333 #^-1.s^-1 | 60 s^-1           | 18 uM^-1.s^-1 |
| PKA-active + PKA-inhibitor <=> inhibited-PKA | 1.1111 #^-1.s^-1 | 1 s^-1            | 59.999 uM^-1.s^-1 | 1 s^-1        |

Enzymes for group /kinetics/PKA

Enzyme-reaction

| Enzyme-reaction                                      | k1                 | k2      | k3     | Km        | kcat   | ratio |
|------------------------------------------------------|--------------------|---------|--------|-----------|--------|-------|
| cAMP-PDE ---PKA-active--> cAMP-PDE*                  | 0.11111 #^-1.s^-1  | 36 s^-1 | 9 s^-1 | 7.5001 uM | 9 s^-1 | 4     |
| I1 ---PKA-active--> I1*                              | 0.11111 #^-1.s^-1  | 36 s^-1 | 9 s^-1 | 7.5001 uM | 9 s^-1 | 4     |
| I1 ---PKA-active--> I1*                              | 0.11111 #^-1.s^-1  | 36 s^-1 | 9 s^-1 | 7.5001 uM | 9 s^-1 | 4     |
| A_B ---PKA-active--> A845*_B                         | 0.074072 #^-1.s^-1 | 24 s^-1 | 6 s^-1 | 7.5002 uM | 6 s^-1 | 4     |
| A831*_B ---PKA-active--> A831*845*_B                 | 0.074072 #^-1.s^-1 | 24 s^-1 | 6 s^-1 | 7.5002 uM | 6 s^-1 | 4     |
| A_B831* ---PKA-active--> A845*_B831*                 | 0.074072 #^-1.s^-1 | 24 s^-1 | 6 s^-1 | 7.5002 uM | 6 s^-1 | 4     |
| A831*_B831* ---PKA-active--> A831*845*_B831*         | 0.074072 #^-1.s^-1 | 24 s^-1 | 6 s^-1 | 7.5002 uM | 6 s^-1 | 4     |
| A_B ---PKA-active--> A_B845*                         | 0.074072 #^-1.s^-1 | 24 s^-1 | 6 s^-1 | 7.5002 uM | 6 s^-1 | 4     |
| A831*_B ---PKA-active--> AA831*_B845*                | 0.074072 #^-1.s^-1 | 24 s^-1 | 6 s^-1 | 7.5002 uM | 6 s^-1 | 4     |
| A_B831* ---PKA-active--> A_B831*845*                 | 0.074072 #^-1.s^-1 | 24 s^-1 | 6 s^-1 | 7.5002 uM | 6 s^-1 | 4     |
| A831*_B831* ---PKA-active--> A831*_B831*845*         | 0.074072 #^-1.s^-1 | 24 s^-1 | 6 s^-1 | 7.5002 uM | 6 s^-1 | 4     |
| A_B845* ---PKA-active--> A845*_B845*                 | 0.074072 #^-1.s^-1 | 24 s^-1 | 6 s^-1 | 7.5002 uM | 6 s^-1 | 4     |
| AA831*_B845* ---PKA-active--> A831*845*_B845*        | 0.074072 #^-1.s^-1 | 24 s^-1 | 6 s^-1 | 7.5002 uM | 6 s^-1 | 4     |
| A_B831*845* ---PKA-active--> A845*_B831*845*         | 0.074072 #^-1.s^-1 | 24 s^-1 | 6 s^-1 | 7.5002 uM | 6 s^-1 | 4     |
| A831*_B831*845* ---PKA-active--> A835*845*_B835*845* | 0.074072 #^-1.s^-1 | 24 s^-1 | 6 s^-1 | 7.5002 uM | 6 s^-1 | 4     |
| A845*_B ---PKA-active--> A845*_B845*                 | 0.074072 #^-1.s^-1 | 24 s^-1 | 6 s^-1 | 7.5002 uM | 6 s^-1 | 4     |
| A831*845*_B ---PKA-active--> A831*845*_B845*         | 0.074072 #^-1.s^-1 | 24 s^-1 | 6 s^-1 | 7.5002 uM | 6 s^-1 | 4     |
| A845*_B831* ---PKA-active--> A845*_B831*845*         | 0.074072 #^-1.s^-1 | 24 s^-1 | 6 s^-1 | 7.5002 uM | 6 s^-1 | 4     |
| A831*845*_B831* ---PKA-active--> A835*845*_B835*845* | 0.074072 #^-1.s^-1 | 24 s^-1 | 6 s^-1 | 7.5002 uM | 6 s^-1 | 4     |
| A_B845* ---PKA-active--> A845*_B845*                 | 0.074072 #^-1.s^-1 | 24 s^-1 | 6 s^-1 | 7.5002 uM | 6 s^-1 | 4     |
| A845*_B ---PKA-active--> A845*_B845*                 | 0.074072 #^-1.s^-1 | 24 s^-1 | 6 s^-1 | 7.5002 uM | 6 s^-1 | 4     |
| A_B ---PKA-active--> A845*_B                         | 0.074072 #^-1.s^-1 | 24 s^-1 | 6 s^-1 | 7.5002 uM | 6 s^-1 | 4     |
| A_B ---PKA-active--> A_B845*                         | 0.074072 #^-1.s^-1 | 24 s^-1 | 6 s^-1 | 7.5002 uM | 6 s^-1 | 4     |
| A831*_B845* ---PKA-active--> A831*845*_B845*         | 0.074072 #^-1.s^-1 | 24 s^-1 | 6 s^-1 | 7.5002 uM | 6 s^-1 | 4     |
| A831*845*_B ---PKA-active--> A831*845*_B845*         | 0.074072 #^-1.s^-1 | 24 s^-1 | 6 s^-1 | 7.5002 uM | 6 s^-1 | 4     |
| A831*_B ---PKA-active--> A831*_B845*                 | 0.074072 #^-1.s^-1 | 24 s^-1 | 6 s^-1 | 7.5002 uM | 6 s^-1 | 4     |
| A831*_B ---PKA-active--> A831*845*_B                 | 0.074072 #^-1.s^-1 | 24 s^-1 | 6 s^-1 | 7.5002 uM | 6 s^-1 | 4     |
| A_B831*845* ---PKA-active--> A845*_B831*845*         | 0.074072 #^-1.s^-1 | 24 s^-1 | 6 s^-1 | 7.5002 uM | 6 s^-1 | 4     |
| A845*_B831* ---PKA-active--> A845*_B831*845*         | 0.074072 #^-1.s^-1 | 24 s^-1 | 6 s^-1 | 7.5002 uM | 6 s^-1 | 4     |
| A_B831* ---PKA-active--> A_B831*845*                 | 0.074072 #^-1.s^-1 | 24 s^-1 | 6 s^-1 | 7.5002 uM | 6 s^-1 | 4     |
| A_B831* ---PKA-active--> A845*_B831*                 | 0.074072 #^-1.s^-1 | 24 s^-1 | 6 s^-1 | 7.5002 uM | 6 s^-1 | 4     |
| A831*_B831*845* ---PKA-active--> A835*845*_B835*845* | 0.074072 #^-1.s^-1 | 24 s^-1 | 6 s^-1 | 7.5002 uM | 6 s^-1 | 4     |
| A831*845*_B831* ---PKA-active--> A835*845*_B835*845* | 0.074072 #^-1.s^-1 | 24 s^-1 | 6 s^-1 | 7.5002 uM | 6 s^-1 | 4     |
| A831*_B831* ---PKA-active--> A831*_B831*845*         | 0.074072 #^-1.s^-1 | 24 s^-1 | 6 s^-1 | 7.5002 uM | 6 s^-1 | 4     |
| A831*_B831* ---PKA-active--> A831*845*_B831*         | 0.074072 #^-1.s^-1 | 24 s^-1 | 6 s^-1 | 7.5002 uM | 6 s^-1 | 4     |

Pools for group /kinetics/PKA

| name          | InitialConc | buffered | Volume  |
|---------------|-------------|----------|---------|
| R2C2          | 0.5 uM      | 0        | 0.09 fl |
| R2C2-cAMP     | 0 uM        | 0        | 0.09 fl |
| R2C2-cAMP2    | 0 uM        | 0        | 0.09 fl |
| R2C2-cAMP3    | 0 uM        | 0        | 0.09 fl |
| R2C2-cAMP4    | 0 uM        | 0        | 0.09 fl |
| R2C-cAMP4     | 0 uM        | 0        | 0.09 fl |
| R2-cAMP4      | 0 uM        | 0        | 0.09 fl |
| PKA-inhibitor | 0.25926 uM  | 0        | 0.09 fl |
| inhibited-PKA | 0 uM        | 0        | 0.09 fl |
| PKA-active    | 0 uM        | 0        | 0.09 fl |

AC/cAMP reactions

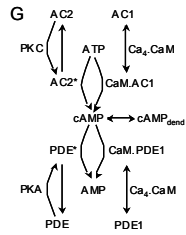

Equations for group /kinetics/AC  
Reactions for group /kinetics/AC  
Reaction

CaM-Ca<sub>4</sub> + AC1 <====> AC1-CaM  
AC2\* <====> AC2  
cAMP-PDE\* <====> cAMP-PDE  
PDE1 + CaM-Ca<sub>4</sub> <====> CaM.PDE1  
cAMP <====> cAMP<sub>in\_dend</sub>

| kf                                       | kb                  | Kf                                       | Kb                  |
|------------------------------------------|---------------------|------------------------------------------|---------------------|
| 0.92592 # <sup>-1</sup> .s <sup>-1</sup> | 1 s <sup>-1</sup>   | 50 uM <sup>-1</sup> .s <sup>-1</sup>     | 1 s <sup>-1</sup>   |
| 0.1 s <sup>-1</sup>                      | 0 s <sup>-1</sup>   | 0.1 s <sup>-1</sup>                      | 0 s <sup>-1</sup>   |
| 0.01 s <sup>-1</sup>                     | 0 s <sup>-1</sup>   | 0.01 s <sup>-1</sup>                     | 0 s <sup>-1</sup>   |
| 13.333 # <sup>-1</sup> .s <sup>-1</sup>  | 5 s <sup>-1</sup>   | 719.98 uM <sup>-1</sup> .s <sup>-1</sup> | 5 s <sup>-1</sup>   |
| 300 s <sup>-1</sup>                      | 5.4 s <sup>-1</sup> | 300 s <sup>-1</sup>                      | 5.4 s <sup>-1</sup> |

Enzymes for group /kinetics/AC  
Enzyme-reaction

ATP ---AC1-CaM--> cAMP  
ATP ---AC2\*--> cAMP  
cAMP ---cAMP-PDE--> AMP  
cAMP ---cAMP-PDE\*--> AMP  
cAMP ---PDE1--> AMP  
cAMP ---CaM.PDE1--> AMP

| k1                                          | k2                   | k3                    | Km        | kcat                  | ratio  |
|---------------------------------------------|----------------------|-----------------------|-----------|-----------------------|--------|
| 0.0013889 # <sup>-1</sup> .s <sup>-1</sup>  | 18 s <sup>-1</sup>   | 4.5 s <sup>-1</sup>   | 300 uM    | 4.5 s <sup>-1</sup>   | 4      |
| 0.00061728 # <sup>-1</sup> .s <sup>-1</sup> | 8 s <sup>-1</sup>    | 2 s <sup>-1</sup>     | 300 uM    | 2 s <sup>-1</sup>     | 4      |
| 0.046667 # <sup>-1</sup> .s <sup>-1</sup>   | 40 s <sup>-1</sup>   | 10 s <sup>-1</sup>    | 19.841 uM | 10 s <sup>-1</sup>    | 4      |
| 0.093333 # <sup>-1</sup> .s <sup>-1</sup>   | 80 s <sup>-1</sup>   | 20 s <sup>-1</sup>    | 19.841 uM | 20 s <sup>-1</sup>    | 4      |
| 0.0038889 # <sup>-1</sup> .s <sup>-1</sup>  | 6.67 s <sup>-1</sup> | 1.667 s <sup>-1</sup> | 39.7 uM   | 1.667 s <sup>-1</sup> | 4.0012 |
| 0.023333 # <sup>-1</sup> .s <sup>-1</sup>   | 40 s <sup>-1</sup>   | 10 s <sup>-1</sup>    | 39.683 uM | 10 s <sup>-1</sup>    | 4      |

Pools for group /kinetics/AC

| name                    | InitialConc | buffered | Volume  |
|-------------------------|-------------|----------|---------|
| ATP                     | 2000 uM     | 1        | 0.09 fl |
| AC1-CaM                 | 0 uM        | 0        | 0.09 fl |
| AC1                     | 0.074074 uM | 0        | 0.09 fl |
| AC2*                    | 0 uM        | 0        | 0.09 fl |
| AC2                     | 0.074074 uM | 0        | 0.09 fl |
| AMP                     | 0 uM        | 0        | 0.09 fl |
| cAMP-PDE                | 0.55556 uM  | 0        | 0.09 fl |
| cAMP-PDE*               | 0 uM        | 0        | 0.09 fl |
| PDE1                    | 2.5926 uM   | 0        | 0.09 fl |
| CaM.PDE1                | 0 uM        | 0        | 0.09 fl |
| cAMP <sub>in_dend</sub> | 0 uM        | 0        | 5 fl    |
| cAMP                    | 0 uM        | 0        | 0.09 fl |

AMPA trafficking reactions

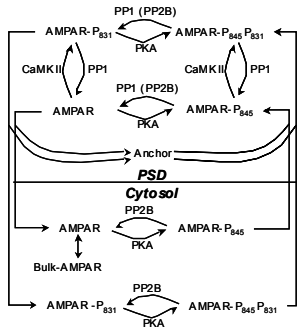

Equations for group /kinetics/AMPA

Reactions for group /kinetics/AMPA

| Reaction                                                | kf                                      | kb                                 | Kf                                       | Kb                                  |               |
|---------------------------------------------------------|-----------------------------------------|------------------------------------|------------------------------------------|-------------------------------------|---------------|
| A831*_B831* <====> A831*_B831* + Anchor                 | 0.0008 s <sup>-1</sup>                  | 0 # <sup>-1</sup> .s <sup>-1</sup> | 0.0008 s <sup>-1</sup>                   | 0 uM <sup>-1</sup> .s <sup>-1</sup> | Traffic Reacn |
| A_B831* <====> A_B831* + Anchor                         | 0.0008 s <sup>-1</sup>                  | 0 # <sup>-1</sup> .s <sup>-1</sup> | 0.0008 s <sup>-1</sup>                   | 0 uM <sup>-1</sup> .s <sup>-1</sup> | Traffic Reacn |
| A831*_B <====> A831*_B + Anchor                         | 0.0008 s <sup>-1</sup>                  | 0 # <sup>-1</sup> .s <sup>-1</sup> | 0.0008 s <sup>-1</sup>                   | 0 uM <sup>-1</sup> .s <sup>-1</sup> | Traffic Reacn |
| A_B <====> A_B + Anchor                                 | 0.0008 s <sup>-1</sup>                  | 0 # <sup>-1</sup> .s <sup>-1</sup> | 0.0008 s <sup>-1</sup>                   | 0 uM <sup>-1</sup> .s <sup>-1</sup> | Traffic Reacn |
| A835*845*_B835*845* <====> AMPAR_deg                    | 3.6e-05 s <sup>-1</sup>                 | 0 s <sup>-1</sup>                  | 3.6e-05 s <sup>-1</sup>                  | 0 s <sup>-1</sup>                   | Model 1 only  |
| A845*_B831*845* <====> AMPAR_deg                        | 3.6e-05 s <sup>-1</sup>                 | 0 s <sup>-1</sup>                  | 3.6e-05 s <sup>-1</sup>                  | 0 s <sup>-1</sup>                   | Model 1 only  |
| A831*845*_B845* <====> AMPAR_deg                        | 3.6e-05 s <sup>-1</sup>                 | 0 s <sup>-1</sup>                  | 3.6e-05 s <sup>-1</sup>                  | 0 s <sup>-1</sup>                   | Model 1 only  |
| A845*_B845* <====> AMPAR_deg                            | 3.6e-05 s <sup>-1</sup>                 | 0 s <sup>-1</sup>                  | 3.6e-05 s <sup>-1</sup>                  | 0 s <sup>-1</sup>                   | Model 1 only  |
| A835*845*_B835*845* + Anchor <====> A835*845*_B835*845* | 0.0002 # <sup>-1</sup> .s <sup>-1</sup> | 0.008 s <sup>-1</sup>              | 0.0108 uM <sup>-1</sup> .s <sup>-1</sup> | 0.008 s <sup>-1</sup>               | Traffic Reacn |
| A845*_B831*845* + Anchor <====> A845*_B831*845*         | 0.0002 # <sup>-1</sup> .s <sup>-1</sup> | 0.008 s <sup>-1</sup>              | 0.0108 uM <sup>-1</sup> .s <sup>-1</sup> | 0.008 s <sup>-1</sup>               | Traffic Reacn |
| A831*845*_B845* + Anchor <====> A831*845*_B845*         | 0.0002 # <sup>-1</sup> .s <sup>-1</sup> | 0.008 s <sup>-1</sup>              | 0.0108 uM <sup>-1</sup> .s <sup>-1</sup> | 0.008 s <sup>-1</sup>               | Traffic Reacn |
| A845*_B845* + Anchor <====> A845*_B845*                 | 0.0002 # <sup>-1</sup> .s <sup>-1</sup> | 0.008 s <sup>-1</sup>              | 0.0108 uM <sup>-1</sup> .s <sup>-1</sup> | 0.008 s <sup>-1</sup>               | Traffic Reacn |
| AMPA_bulk <====> A_B                                    | 0.018 s <sup>-1</sup>                   | 1 s <sup>-1</sup>                  | 0.018 s <sup>-1</sup>                    | 1 s <sup>-1</sup>                   | Traffic Reacn |
| GluR23_M <====> GluR23_I                                | 0.00035 s <sup>-1</sup>                 | 0.0014 s <sup>-1</sup>             | 0.00035 s <sup>-1</sup>                  | 0.0014 s <sup>-1</sup>              | Traffic Reacn |

Pools for group /kinetics/AMPA

| name                | InitialConc | buffered | Volume  |
|---------------------|-------------|----------|---------|
| GluR23_I            | 0.092593 uM | 0        | 0.09 fl |
| AMPA_deg            | 0 uM        | 1        | 0.09 fl |
| A_B                 | 0 uM        | 0        | 0.09 fl |
| A831*_B             | 0 uM        | 0        | 0.09 fl |
| A845*_B             | 0 uM        | 0        | 0.09 fl |
| A831*845*_B         | 0 uM        | 0        | 0.09 fl |
| A_B845*             | 0 uM        | 0        | 0.09 fl |
| AA831*_B845*        | 0 uM        | 0        | 0.09 fl |
| A845*_B845*         | 0 uM        | 0        | 0.09 fl |
| A831*845*_B845*     | 0 uM        | 0        | 0.09 fl |
| A845*_B831*845*     | 0 uM        | 0        | 0.09 fl |
| A835*845*_B835*845* | 0 uM        | 0        | 0.09 fl |
| A_B831*845*         | 0 uM        | 0        | 0.09 fl |
| A831*_B831*845*     | 0 uM        | 0        | 0.09 fl |
| A_B831*             | 0 uM        | 0        | 0.09 fl |
| A845*_B831*         | 0 uM        | 0        | 0.01 fl |
| A831*_B831*         | 0 uM        | 0        | 0.09 fl |
| A831*845*_B831*     | 0 uM        | 0        | 0.09 fl |
| AMPA_bulk           | 0.011111 uM | 1        | 5 fl    |
| I_845               | 0 uM        | 0        | 0.09 fl |
| I_845-P             | 0 uM        | 0        | 0.09 fl |
| I_845-PP            | 0 uM        | 0        | 0.09 fl |
| tot_I_GluR12        | 0 uM        | 0        | 0.09 fl |
| total_Int           | 0.096296 uM | 0        | 0.09 fl |

Equations for group /kinetics/AMPA\_memb

Pools for group /kinetics/AMPA\_memb

| name                | InitialConc | buffered | Volume  |
|---------------------|-------------|----------|---------|
| A_B                 | 0 uM        | 0        | 0.01 fl |
| A831*_B             | 0 uM        | 0        | 0.01 fl |
| A_B831*             | 0 uM        | 0        | 0.01 fl |
| A831*_B831*         | 0 uM        | 0        | 0.01 fl |
| A845*_B             | 0 uM        | 0        | 0.01 fl |
| A831*845*_B         | 0 uM        | 0        | 0.01 fl |
| A831*845*_B831*     | 0 uM        | 0        | 0.01 fl |
| A_B845*             | 0 uM        | 0        | 0.01 fl |
| A845*_B831*         | 0 uM        | 0        | 0.01 fl |
| A845*_B845*         | 0 uM        | 0        | 0.01 fl |
| A831*_B845*         | 0 uM        | 0        | 0.01 fl |
| A_B831*845*         | 0 uM        | 0        | 0.01 fl |
| A831*_B831*845*     | 0 uM        | 0        | 0.01 fl |
| A831*845*_B845*     | 0 uM        | 0        | 0.01 fl |
| A845*_B831*845*     | 0 uM        | 0        | 0.01 fl |
| A835*845*_B835*845* | 0 uM        | 0        | 0.01 fl |
| GluR23_M            | 3.5 uM      | 0        | 0.01 fl |



|                |           |   |         |
|----------------|-----------|---|---------|
| Ser845-PP      | 0 uM      | 0 | 0.01 fl |
| Ser845-P       | 0 uM      | 0 | 0.01 fl |
| Ser845         | 0 uM      | 0 | 0.01 fl |
| tot_mem_GluR12 | 0 uM      | 0 | 0.01 fl |
| total_mem      | 3.4667 uM | 0 | 0.01 fl |
| Ser831         | 0 uM      | 0 | 0.01 fl |
| Ser831-P       | 0 uM      | 0 | 0.01 fl |
| Ser831-PP      | 0 uM      | 0 | 0.01 fl |
| Anchor         | 27.333 uM | 0 | 0.01 fl |

-----

Same data, sorting by data type:

Equations for group /##[]

Reactions for group /##[]

Reaction

| Reaction                                                     | kf                                         | kb                                       | Kf                                        | Kb                                      |
|--------------------------------------------------------------|--------------------------------------------|------------------------------------------|-------------------------------------------|-----------------------------------------|
| PKC-control <====> PKC-active                                | 2.5 s <sup>-1</sup>                        | 2.5 s <sup>-1</sup>                      | 2.5 s <sup>-1</sup>                       | 2.5 s <sup>-1</sup>                     |
| Ca_control_cyt <====> Ca                                     | 100 s <sup>-1</sup>                        | 100 s <sup>-1</sup>                      | 100 s <sup>-1</sup>                       | 100 s <sup>-1</sup>                     |
| Ca_control_PSD <====> Ca-PSD                                 | 100 s <sup>-1</sup>                        | 100 s <sup>-1</sup>                      | 100 s <sup>-1</sup>                       | 100 s <sup>-1</sup>                     |
| CaM-Ca4 + CaMKII <====> CaMKII-CaM                           | 0.92592 # <sup>-1</sup> .s <sup>-1</sup>   | 5 s <sup>-1</sup>                        | 50 uM <sup>-1</sup> .s <sup>-1</sup>      | 5 s <sup>-1</sup>                       |
| CaMKII-thr286 + CaM-Ca4 <====> CaMKII-thr286-CaM             | 18.522 # <sup>-1</sup> .s <sup>-1</sup>    | 0.1 s <sup>-1</sup>                      | 1000.2 uM <sup>-1</sup> .s <sup>-1</sup>  | 0.1 s <sup>-1</sup>                     |
| CaMKII-thr305-PSD <====> CaMK-thr305 + NMDAR                 | 0.3 s <sup>-1</sup>                        | 1e-05 # <sup>-1</sup> .s <sup>-1</sup>   | 0.3 s <sup>-1</sup>                       | 6e-05 uM <sup>-1</sup> .s <sup>-1</sup> |
| CaMKII-PSD <====> CaMKII + NMDAR                             | 0.3 s <sup>-1</sup>                        | 1e-05 # <sup>-1</sup> .s <sup>-1</sup>   | 0.3 s <sup>-1</sup>                       | 6e-05 uM <sup>-1</sup> .s <sup>-1</sup> |
| CaMKII-CaM + NMDAR <====> CaMKII-CaM-PSD                     | 2e-05 # <sup>-1</sup> .s <sup>-1</sup>     | 0 s <sup>-1</sup>                        | 0.00108 uM <sup>-1</sup> .s <sup>-1</sup> | 0 s <sup>-1</sup>                       |
| CaMKII-thr286-CaM + NMDAR <====> CaMKII-thr286-CaM-PSD       | 2e-05 # <sup>-1</sup> .s <sup>-1</sup>     | 0 s <sup>-1</sup>                        | 0.00108 uM <sup>-1</sup> .s <sup>-1</sup> | 0 s <sup>-1</sup>                       |
| basal_CaMKII_PSD_control <====> basal_CaMKII_PSD             | 1 s <sup>-1</sup>                          | 1 s <sup>-1</sup>                        | 1 s <sup>-1</sup>                         | 1 s <sup>-1</sup>                       |
| CaMKII-CaM-PSD <====> CaM-Ca4-PSD + CaMKII-PSD               | 5 s <sup>-1</sup>                          | 0 # <sup>-1</sup> .s <sup>-1</sup>       | 5 s <sup>-1</sup>                         | 0 uM <sup>-1</sup> .s <sup>-1</sup>     |
| CaMKII-PSD + CaM-Ca4-PSD <====> CaMKII-CaM-PSD               | 8.3333 # <sup>-1</sup> .s <sup>-1</sup>    | 0 s <sup>-1</sup>                        | 50 uM <sup>-1</sup> .s <sup>-1</sup>      | 0 s <sup>-1</sup>                       |
| CaMKII-thr286-PSD + CaM-Ca4-PSD <====> CaMKII-thr286-CaM-PSD | 166.67 # <sup>-1</sup> .s <sup>-1</sup>    | 0.1 s <sup>-1</sup>                      | 1000 uM <sup>-1</sup> .s <sup>-1</sup>    | 0.1 s <sup>-1</sup>                     |
| CaM + 2 Ca <====> CaM-TR2-Ca2                                | 0.024691 # <sup>-2</sup> .s <sup>-1</sup>  | 72 s <sup>-1</sup>                       | 71.999 uM <sup>-2</sup> .s <sup>-1</sup>  | 72 s <sup>-1</sup>                      |
| CaM-TR2-Ca2 + Ca <====> CaM-Ca3                              | 0.066667 # <sup>-1</sup> .s <sup>-1</sup>  | 10 s <sup>-1</sup>                       | 3.6 uM <sup>-1</sup> .s <sup>-1</sup>     | 10 s <sup>-1</sup>                      |
| neurogranin + CaM <====> neurogranin-CaM                     | 0.0055556 # <sup>-1</sup> .s <sup>-1</sup> | 1 s <sup>-1</sup>                        | 0.3 uM <sup>-1</sup> .s <sup>-1</sup>     | 1 s <sup>-1</sup>                       |
| neurogranin* <====> neurogranin                              | 0.005 s <sup>-1</sup>                      | 0 s <sup>-1</sup>                        | 0.005 s <sup>-1</sup>                     | 0 s <sup>-1</sup>                       |
| CaM-PSD + 2 Ca-PSD <====> CaM-TR2-Ca2-PSD                    | 2 # <sup>-2</sup> .s <sup>-1</sup>         | 72 s <sup>-1</sup>                       | 72 uM <sup>-2</sup> .s <sup>-1</sup>      | 72 s <sup>-1</sup>                      |
| CaM-TR2-Ca2-PSD + Ca-PSD <====> CaM-Ca3-PSD                  | 0.6 # <sup>-1</sup> .s <sup>-1</sup>       | 10 s <sup>-1</sup>                       | 3.6 uM <sup>-1</sup> .s <sup>-1</sup>     | 10 s <sup>-1</sup>                      |
| CaM-Ca3-PSD + Ca-PSD <====> CaM-Ca4-PSD                      | 0.077502 # <sup>-1</sup> .s <sup>-1</sup>  | 10 s <sup>-1</sup>                       | 0.46501 uM <sup>-1</sup> .s <sup>-1</sup> | 10 s <sup>-1</sup>                      |
| neurogranin_PSD + CaM-PSD <====> neurogranin-CaM_PSD         | 0.05 # <sup>-1</sup> .s <sup>-1</sup>      | 1 s <sup>-1</sup>                        | 0.3 uM <sup>-1</sup> .s <sup>-1</sup>     | 1 s <sup>-1</sup>                       |
| neurogranin_PSD <====> neurogranin_PSD                       | 0.005 s <sup>-1</sup>                      | 0 s <sup>-1</sup>                        | 0.005 s <sup>-1</sup>                     | 0 s <sup>-1</sup>                       |
| CaM-Ca3 + Ca <====> CaM-Ca4                                  | 0.0086111 # <sup>-1</sup> .s <sup>-1</sup> | 10 s <sup>-1</sup>                       | 0.465 uM <sup>-1</sup> .s <sup>-1</sup>   | 10 s <sup>-1</sup>                      |
| CaM-Ca4-PSD <====> CaM-Ca4                                   | 540 s <sup>-1</sup>                        | 60 s <sup>-1</sup>                       | 540 s <sup>-1</sup>                       | 60 s <sup>-1</sup>                      |
| I1* + PP1-active <====> PP1-I1*                              | 9.2589 # <sup>-1</sup> .s <sup>-1</sup>    | 0.1 s <sup>-1</sup>                      | 499.98 uM <sup>-1</sup> .s <sup>-1</sup>  | 0.1 s <sup>-1</sup>                     |
| PP1-I1 <====> PP1-active + I1                                | 1 s <sup>-1</sup>                          | 0 # <sup>-1</sup> .s <sup>-1</sup>       | 1 s <sup>-1</sup>                         | 0 uM <sup>-1</sup> .s <sup>-1</sup>     |
| 2 Ca + CaNAB-Ca2 <====> CaNAB-Ca4                            | 0.0012346 # <sup>-2</sup> .s <sup>-1</sup> | 1 s <sup>-1</sup>                        | 3.6001 uM <sup>-2</sup> .s <sup>-1</sup>  | 1 s <sup>-1</sup>                       |
| CaNAB + 2 Ca <====> CaNAB-Ca2                                | 3.4321 # <sup>-2</sup> .s <sup>-1</sup>    | 1 s <sup>-1</sup>                        | 10008 uM <sup>-2</sup> .s <sup>-1</sup>   | 1 s <sup>-1</sup>                       |
| CaM-Ca4 + CaNAB-Ca4 <====> CaM_Ca_nCaNAB                     | 11.111 # <sup>-1</sup> .s <sup>-1</sup>    | 1 s <sup>-1</sup>                        | 599.99 uM <sup>-1</sup> .s <sup>-1</sup>  | 1 s <sup>-1</sup>                       |
| R2C2 + cAMP <====> R2C2-cAMP                                 | 1 # <sup>-1</sup> .s <sup>-1</sup>         | 33 s <sup>-1</sup>                       | 54 uM <sup>-1</sup> .s <sup>-1</sup>      | 33 s <sup>-1</sup>                      |
| R2C2-cAMP + cAMP <====> R2C2-cAMP2                           | 1 # <sup>-1</sup> .s <sup>-1</sup>         | 33 s <sup>-1</sup>                       | 54 uM <sup>-1</sup> .s <sup>-1</sup>      | 33 s <sup>-1</sup>                      |
| R2C2-cAMP2 + cAMP <====> R2C2-cAMP3                          | 1.3889 # <sup>-1</sup> .s <sup>-1</sup>    | 110 s <sup>-1</sup>                      | 75.001 uM <sup>-1</sup> .s <sup>-1</sup>  | 110 s <sup>-1</sup>                     |
| cAMP + R2C2-cAMP3 <====> R2C2-cAMP4                          | 1.3889 # <sup>-1</sup> .s <sup>-1</sup>    | 32.5 s <sup>-1</sup>                     | 75.001 uM <sup>-1</sup> .s <sup>-1</sup>  | 32.5 s <sup>-1</sup>                    |
| R2C2-cAMP4 <====> PKA-active + R2C2-cAMP4                    | 60 s <sup>-1</sup>                         | 0.33333 # <sup>-1</sup> .s <sup>-1</sup> | 60 s <sup>-1</sup>                        | 18 uM <sup>-1</sup> .s <sup>-1</sup>    |
| R2C2-cAMP4 <====> PKA-active + R2-cAMP4                      | 60 s <sup>-1</sup>                         | 0.33333 # <sup>-1</sup> .s <sup>-1</sup> | 60 s <sup>-1</sup>                        | 18 uM <sup>-1</sup> .s <sup>-1</sup>    |
| PKA-active + PKA-inhibitor <====> inhibited-PKA              | 1.1111 # <sup>-1</sup> .s <sup>-1</sup>    | 1 s <sup>-1</sup>                        | 59.999 uM <sup>-1</sup> .s <sup>-1</sup>  | 1 s <sup>-1</sup>                       |
| CaM-Ca4 + AC1 <====> AC1-CaM                                 | 0.92592 # <sup>-1</sup> .s <sup>-1</sup>   | 1 s <sup>-1</sup>                        | 50 uM <sup>-1</sup> .s <sup>-1</sup>      | 1 s <sup>-1</sup>                       |
| AC2* <====> AC2                                              | 0.1 s <sup>-1</sup>                        | 0 s <sup>-1</sup>                        | 0.1 s <sup>-1</sup>                       | 0 s <sup>-1</sup>                       |
| cAMP-PDE* <====> cAMP-PDE                                    | 0.01 s <sup>-1</sup>                       | 0 s <sup>-1</sup>                        | 0.01 s <sup>-1</sup>                      | 0 s <sup>-1</sup>                       |
| PDE1 + CaM-Ca4 <====> CaM.PDE1                               | 13.333 # <sup>-1</sup> .s <sup>-1</sup>    | 5 s <sup>-1</sup>                        | 719.98 uM <sup>-1</sup> .s <sup>-1</sup>  | 5 s <sup>-1</sup>                       |
| cAMP <====> cAMP_in_dend                                     | 300 s <sup>-1</sup>                        | 5.4 s <sup>-1</sup>                      | 300 s <sup>-1</sup>                       | 5.4 s <sup>-1</sup>                     |
| PP1-I1 <====> I1 + PP1-active_PSD                            | 1 s <sup>-1</sup>                          | 0 # <sup>-1</sup> .s <sup>-1</sup>       | 1 s <sup>-1</sup>                         | 0 uM <sup>-1</sup> .s <sup>-1</sup>     |
| I1* + PP1-active_PSD <====> PP1-I1*                          | 83.33 # <sup>-1</sup> .s <sup>-1</sup>     | 0.1 s <sup>-1</sup>                      | 499.98 uM <sup>-1</sup> .s <sup>-1</sup>  | 0.1 s <sup>-1</sup>                     |
| A831*_B831* <====> A831*_B831* + Anchor                      | 0.0008 s <sup>-1</sup>                     | 0 # <sup>-1</sup> .s <sup>-1</sup>       | 0.0008 s <sup>-1</sup>                    | 0 uM <sup>-1</sup> .s <sup>-1</sup>     |
| A_B831* <====> A_B831* + Anchor                              | 0.0008 s <sup>-1</sup>                     | 0 # <sup>-1</sup> .s <sup>-1</sup>       | 0.0008 s <sup>-1</sup>                    | 0 uM <sup>-1</sup> .s <sup>-1</sup>     |
| A831*_B <====> A831*_B + Anchor                              | 0.0008 s <sup>-1</sup>                     | 0 # <sup>-1</sup> .s <sup>-1</sup>       | 0.0008 s <sup>-1</sup>                    | 0 uM <sup>-1</sup> .s <sup>-1</sup>     |
| A_B <====> A_B + Anchor                                      | 0.0008 s <sup>-1</sup>                     | 0 # <sup>-1</sup> .s <sup>-1</sup>       | 0.0008 s <sup>-1</sup>                    | 0 uM <sup>-1</sup> .s <sup>-1</sup>     |
| A835*845*_B835*845* <====> AMPAR_deg                         | 3.6e-05 s <sup>-1</sup>                    | 0 s <sup>-1</sup>                        | 3.6e-05 s <sup>-1</sup>                   | 0 s <sup>-1</sup>                       |
| A845*_B831*845* <====> AMPAR_deg                             | 3.6e-05 s <sup>-1</sup>                    | 0 s <sup>-1</sup>                        | 3.6e-05 s <sup>-1</sup>                   | 0 s <sup>-1</sup>                       |
| A831*845*_B845* <====> AMPAR_deg                             | 3.6e-05 s <sup>-1</sup>                    | 0 s <sup>-1</sup>                        | 3.6e-05 s <sup>-1</sup>                   | 0 s <sup>-1</sup>                       |
| A845*_B845* <====> AMPAR_deg                                 | 3.6e-05 s <sup>-1</sup>                    | 0 s <sup>-1</sup>                        | 3.6e-05 s <sup>-1</sup>                   | 0 s <sup>-1</sup>                       |
| A835*845*_B835*845* + Anchor <====> A835*845*_B835*845*      | 0.0002 # <sup>-1</sup> .s <sup>-1</sup>    | 0.008 s <sup>-1</sup>                    | 0.0108 uM <sup>-1</sup> .s <sup>-1</sup>  | 0.008 s <sup>-1</sup>                   |
| A845*_B831*845* + Anchor <====> A845*_B831*845*              | 0.0002 # <sup>-1</sup> .s <sup>-1</sup>    | 0.008 s <sup>-1</sup>                    | 0.0108 uM <sup>-1</sup> .s <sup>-1</sup>  | 0.008 s <sup>-1</sup>                   |
| A831*845*_B845* + Anchor <====> A831*845*_B845*              | 0.0002 # <sup>-1</sup> .s <sup>-1</sup>    | 0.008 s <sup>-1</sup>                    | 0.0108 uM <sup>-1</sup> .s <sup>-1</sup>  | 0.008 s <sup>-1</sup>                   |
| A845*_B845* + Anchor <====> A845*_B845*                      | 0.0002 # <sup>-1</sup> .s <sup>-1</sup>    | 0.008 s <sup>-1</sup>                    | 0.0108 uM <sup>-1</sup> .s <sup>-1</sup>  | 0.008 s <sup>-1</sup>                   |
| AMPA_bulk <====> A_B                                         | 0.018 s <sup>-1</sup>                      | 1 s <sup>-1</sup>                        | 0.018 s <sup>-1</sup>                     | 1 s <sup>-1</sup>                       |
| GluR23_M <====> GluR23_I                                     | 0.00035 s <sup>-1</sup>                    | 0.0014 s <sup>-1</sup>                   | 0.00035 s <sup>-1</sup>                   | 0.0014 s <sup>-1</sup>                  |

Enzymes for group /##[]

Enzyme-reaction

| Enzyme-reaction                                                | k1                                          | k2                   | k3                   | Km        | kcat                 | ratio  |
|----------------------------------------------------------------|---------------------------------------------|----------------------|----------------------|-----------|----------------------|--------|
| neurogranin --PKC-active--> neurogranin*                       | 0.0018889 # <sup>-1</sup> .s <sup>-1</sup>  | 2.34 s <sup>-1</sup> | 0.58 s <sup>-1</sup> | 28.627 uM | 0.58 s <sup>-1</sup> | 4.0345 |
| neurogranin-CaM --PKC-active--> CaM + neurogranin*             | 0.0011333 # <sup>-1</sup> .s <sup>-1</sup>  | 1.4 s <sup>-1</sup>  | 0.35 s <sup>-1</sup> | 28.596 uM | 0.35 s <sup>-1</sup> | 4      |
| AC2 --PKC-active--> AC2*                                       | 0.011111 # <sup>-1</sup> .s <sup>-1</sup>   | 16 s <sup>-1</sup>   | 4 s <sup>-1</sup>    | 33.334 uM | 4 s <sup>-1</sup>    | 4      |
| neurogranin_PSD --PKC-active--> neurogranin*_PSD               | 0.0018889 # <sup>-1</sup> .s <sup>-1</sup>  | 2.34 s <sup>-1</sup> | 0.58 s <sup>-1</sup> | 28.627 uM | 0.58 s <sup>-1</sup> | 4.0345 |
| neurogranin-CaM_PSD --PKC-active--> CaM-PSD + neurogranin*_PSD | 0.0011333 # <sup>-1</sup> .s <sup>-1</sup>  | 1.4 s <sup>-1</sup>  | 0.35 s <sup>-1</sup> | 28.596 uM | 0.35 s <sup>-1</sup> | 4      |
| CaMKII-thr286 --tot_CaM_CaMKII--> CaMKII***                    | 0.0048904 # <sup>-1</sup> .s <sup>-1</sup>  | 24 s <sup>-1</sup>   | 6 s <sup>-1</sup>    | 113.6 uM  | 6 s <sup>-1</sup>    | 4      |
| CaMKII-CaM --tot_CaM_CaMKII--> CaMKII-thr286*-CaM              | 0.00040753 # <sup>-1</sup> .s <sup>-1</sup> | 2 s <sup>-1</sup>    | 0.5 s <sup>-1</sup>  | 113.6 uM  | 0.5 s <sup>-1</sup>  | 4      |
| CaMKII-thr286 --tot_autonomous_CaMKII--> CaMKII***             | 0.0031746 # <sup>-1</sup> .s <sup>-1</sup>  | 24 s <sup>-1</sup>   | 6 s <sup>-1</sup>    | 175 uM    | 6 s <sup>-1</sup>    | 4      |
| CaMKII-CaM --tot_autonomous_CaMKII--> CaMKII-thr286*-CaM       | 0.00026456 # <sup>-1</sup> .s <sup>-1</sup> | 2 s <sup>-1</sup>    | 0.5 s <sup>-1</sup>  | 174.99 uM | 0.5 s <sup>-1</sup>  | 4      |
| CaMKII-thr286-PSD --tot-auto-PSD--> CaMKII***-PSD              | 0.04 # <sup>-1</sup> .s <sup>-1</sup>       | 24 s <sup>-1</sup>   | 6 s <sup>-1</sup>    | 125 uM    | 6 s <sup>-1</sup>    | 4      |
| CaMKII-CaM-PSD --tot-auto-PSD--> CaMKII-thr286-CaM-PSD         | 0.0033333 # <sup>-1</sup> .s <sup>-1</sup>  | 2 s <sup>-1</sup>    | 0.5 s <sup>-1</sup>  | 125 uM    | 0.5 s <sup>-1</sup>  | 4      |
| A845*_B845* --actCaMKII-PSD--> A831*845*_B845*                 | 0.0046296 # <sup>-1</sup> .s <sup>-1</sup>  | 2 s <sup>-1</sup>    | 0.5 s <sup>-1</sup>  | 90.001 uM | 0.5 s <sup>-1</sup>  | 4      |
| A_B845* --actCaMKII-PSD--> A831*_B845*                         | 0.0046296 # <sup>-1</sup> .s <sup>-1</sup>  | 2 s <sup>-1</sup>    | 0.5 s <sup>-1</sup>  | 90.001 uM | 0.5 s <sup>-1</sup>  | 4      |
| A845*_B --actCaMKII-PSD--> A831*845*_B                         | 0.0046296 # <sup>-1</sup> .s <sup>-1</sup>  | 2 s <sup>-1</sup>    | 0.5 s <sup>-1</sup>  | 90.001 uM | 0.5 s <sup>-1</sup>  | 4      |
| A_B --actCaMKII-PSD--> A831*_B                                 | 0.0046296 # <sup>-1</sup> .s <sup>-1</sup>  | 2 s <sup>-1</sup>    | 0.5 s <sup>-1</sup>  | 90.001 uM | 0.5 s <sup>-1</sup>  | 4      |
| A845*_B845* --actCaMKII-PSD--> A845*_B831*845*                 | 0.0046296 # <sup>-1</sup> .s <sup>-1</sup>  | 2 s <sup>-1</sup>    | 0.5 s <sup>-1</sup>  | 90.001 uM | 0.5 s <sup>-1</sup>  | 4      |
| A_B845* --actCaMKII-PSD--> A_B831*845*                         | 0.0046296 # <sup>-1</sup> .s <sup>-1</sup>  | 2 s <sup>-1</sup>    | 0.5 s <sup>-1</sup>  | 90.001 uM | 0.5 s <sup>-1</sup>  | 4      |
| A845*_B --actCaMKII-PSD--> A845*_B831*                         | 0.0046296 # <sup>-1</sup> .s <sup>-1</sup>  | 2 s <sup>-1</sup>    | 0.5 s <sup>-1</sup>  | 90.001 uM | 0.5 s <sup>-1</sup>  | 4      |
| A_B --actCaMKII-PSD--> A_B831*                                 | 0.0046296 # <sup>-1</sup> .s <sup>-1</sup>  | 2 s <sup>-1</sup>    | 0.5 s <sup>-1</sup>  | 90.001 uM | 0.5 s <sup>-1</sup>  | 4      |
| A845*_B831*845* --actCaMKII-PSD--> A835*845*_B835*845*         | 0.0046296 # <sup>-1</sup> .s <sup>-1</sup>  | 2 s <sup>-1</sup>    | 0.5 s <sup>-1</sup>  | 90.001 uM | 0.5 s <sup>-1</sup>  | 4      |
| A_B831*845* --actCaMKII-PSD--> A831*_B831*845*                 | 0.0046296 # <sup>-1</sup> .s <sup>-1</sup>  | 2 s <sup>-1</sup>    | 0.5 s <sup>-1</sup>  | 90.001 uM | 0.5 s <sup>-1</sup>  | 4      |
| A845*_B831* --actCaMKII-PSD--> A831*845*_B831*                 | 0.0046296 # <sup>-1</sup> .s <sup>-1</sup>  | 2 s <sup>-1</sup>    | 0.5 s <sup>-1</sup>  | 90.001 uM | 0.5 s <sup>-1</sup>  | 4      |



|                                                          |                      |           |            |            |            |        |
|----------------------------------------------------------|----------------------|-----------|------------|------------|------------|--------|
| ATP ---AC2--> cAMP                                       | 0.00061728 #^-1.s^-1 | 8 s^-1    | 2 s^-1     | 300 uM     | 2 s^-1     | 4      |
| cAMP ---cAMP-PDE-> AMP                                   | 0.046667 #^-1.s^-1   | 40 s^-1   | 10 s^-1    | 19.841 uM  | 10 s^-1    | 4      |
| cAMP ---cAMP-PDE*-> AMP                                  | 0.093333 #^-1.s^-1   | 80 s^-1   | 20 s^-1    | 19.841 uM  | 20 s^-1    | 4      |
| cAMP ---PDE1-> AMP                                       | 0.0038889 #^-1.s^-1  | 6.67 s^-1 | 1.667 s^-1 | 39.7 uM    | 1.667 s^-1 | 4.0012 |
| cAMP ---CaM.PDE1-> AMP                                   | 0.023333 #^-1.s^-1   | 40 s^-1   | 10 s^-1    | 39.683 uM  | 10 s^-1    | 4      |
| CaMKII-thr286-CaM-PSD ---PP1-active_PSD-> CaMKII-CaM-PSD | 1.0417 #^-1.s^-1     | 10 s^-1   | 2.5 s^-1   | 1.9999 uM  | 2.5 s^-1   | 4      |
| CaMKII-thr286-PSD ---PP1-active_PSD-> CaMKII-PSD         | 1.0417 #^-1.s^-1     | 10 s^-1   | 2.5 s^-1   | 1.9999 uM  | 2.5 s^-1   | 4      |
| CaMKII***-PSD ---PP1-active_PSD-> CaMKII-thr286-PSD      | 0.40857 #^-1.s^-1    | 10 s^-1   | 2.5 s^-1   | 5.0991 uM  | 2.5 s^-1   | 4      |
| CaMKII***-PSD ---PP1-active_PSD-> CaMKII-thr305-PSD      | 1.0417 #^-1.s^-1     | 10 s^-1   | 2.5 s^-1   | 1.9999 uM  | 2.5 s^-1   | 4      |
| A845*_B845* ---PP1-active_PSD-> A_B845*                  | 0.14583 #^-1.s^-1    | 0.68 s^-1 | 0.17 s^-1  | 0.97145 uM | 0.17 s^-1  | 4      |
| A845*_B845* ---PP1-active_PSD-> A845*_B                  | 0.14583 #^-1.s^-1    | 0.68 s^-1 | 0.17 s^-1  | 0.97145 uM | 0.17 s^-1  | 4      |
| A845*_B ---PP1-active_PSD-> A_B                          | 0.14583 #^-1.s^-1    | 0.68 s^-1 | 0.17 s^-1  | 0.97145 uM | 0.17 s^-1  | 4      |
| A_B845* ---PP1-active_PSD-> A_B                          | 0.14583 #^-1.s^-1    | 0.68 s^-1 | 0.17 s^-1  | 0.97145 uM | 0.17 s^-1  | 4      |
| A831*845*_B845* ---PP1-active_PSD-> A831*_B845*          | 0.14583 #^-1.s^-1    | 0.68 s^-1 | 0.17 s^-1  | 0.97145 uM | 0.17 s^-1  | 4      |
| A831*845*_B845* ---PP1-active_PSD-> A831*_B845*_B        | 0.14583 #^-1.s^-1    | 0.68 s^-1 | 0.17 s^-1  | 0.97145 uM | 0.17 s^-1  | 4      |
| A831*_B845* ---PP1-active_PSD-> A831*_B                  | 0.14583 #^-1.s^-1    | 0.68 s^-1 | 0.17 s^-1  | 0.97145 uM | 0.17 s^-1  | 4      |
| A831*845*_B ---PP1-active_PSD-> A831*_B                  | 0.14583 #^-1.s^-1    | 0.68 s^-1 | 0.17 s^-1  | 0.97145 uM | 0.17 s^-1  | 4      |
| A831*_B845* ---PP1-active_PSD-> A831*_B845*              | 0.14583 #^-1.s^-1    | 0.68 s^-1 | 0.17 s^-1  | 0.97145 uM | 0.17 s^-1  | 4      |
| A831*_B845*_B ---PP1-active_PSD-> A831*_B845*_B          | 0.14583 #^-1.s^-1    | 0.68 s^-1 | 0.17 s^-1  | 0.97145 uM | 0.17 s^-1  | 4      |
| A831*_B845* ---PP1-active_PSD-> A_B845*                  | 0.14583 #^-1.s^-1    | 1.4 s^-1  | 0.35 s^-1  | 2 uM       | 0.35 s^-1  | 4      |
| A831*845*_B ---PP1-active_PSD-> A_B845*                  | 0.14583 #^-1.s^-1    | 1.4 s^-1  | 0.35 s^-1  | 2 uM       | 0.35 s^-1  | 4      |
| A831*_B ---PP1-active_PSD-> A_B                          | 0.14583 #^-1.s^-1    | 1.4 s^-1  | 0.35 s^-1  | 2 uM       | 0.35 s^-1  | 4      |
| A845*_B831*845* ---PP1-active_PSD-> A_B831*845*          | 0.14583 #^-1.s^-1    | 0.68 s^-1 | 0.17 s^-1  | 0.97145 uM | 0.17 s^-1  | 4      |
| A845*_B831*845* ---PP1-active_PSD-> A845*_B831*          | 0.14583 #^-1.s^-1    | 0.68 s^-1 | 0.17 s^-1  | 0.97145 uM | 0.17 s^-1  | 4      |
| A_B831*845* ---PP1-active_PSD-> A_B831*                  | 0.14583 #^-1.s^-1    | 0.68 s^-1 | 0.17 s^-1  | 0.97145 uM | 0.17 s^-1  | 4      |
| A845*_B831* ---PP1-active_PSD-> A_B831*                  | 0.14583 #^-1.s^-1    | 0.68 s^-1 | 0.17 s^-1  | 0.97145 uM | 0.17 s^-1  | 4      |
| A835*845*_B835*845* ---PP1-active_PSD-> A831*_B831*845*  | 0.14583 #^-1.s^-1    | 0.68 s^-1 | 0.17 s^-1  | 0.97145 uM | 0.17 s^-1  | 4      |
| A835*845*_B835*845* ---PP1-active_PSD-> A831*845*_B831*  | 0.14583 #^-1.s^-1    | 0.68 s^-1 | 0.17 s^-1  | 0.97145 uM | 0.17 s^-1  | 4      |
| A831*_B831*845* ---PP1-active_PSD-> A831*_B831*          | 0.14583 #^-1.s^-1    | 0.68 s^-1 | 0.17 s^-1  | 0.97145 uM | 0.17 s^-1  | 4      |
| A831*845*_B831* ---PP1-active_PSD-> A831*_B831*          | 0.14583 #^-1.s^-1    | 0.68 s^-1 | 0.17 s^-1  | 0.97145 uM | 0.17 s^-1  | 4      |
| A_B831*845* ---PP1-active_PSD-> A_B845*                  | 0.14583 #^-1.s^-1    | 1.4 s^-1  | 0.35 s^-1  | 2 uM       | 0.35 s^-1  | 4      |
| A845*_B831*845* ---PP1-active_PSD-> A845*_B845*          | 0.14583 #^-1.s^-1    | 1.4 s^-1  | 0.35 s^-1  | 2 uM       | 0.35 s^-1  | 4      |
| A845*_B831* ---PP1-active_PSD-> A845*_B                  | 0.14583 #^-1.s^-1    | 1.4 s^-1  | 0.35 s^-1  | 2 uM       | 0.35 s^-1  | 4      |
| A_B831* ---PP1-active_PSD-> A_B                          | 0.14583 #^-1.s^-1    | 1.4 s^-1  | 0.35 s^-1  | 2 uM       | 0.35 s^-1  | 4      |
| A835*845*_B835*845* ---PP1-active_PSD-> A845*_B831*845*  | 0.14583 #^-1.s^-1    | 1.4 s^-1  | 0.35 s^-1  | 2 uM       | 0.35 s^-1  | 4      |
| A831*_B831*845* ---PP1-active_PSD-> A_B831*845*          | 0.14583 #^-1.s^-1    | 1.4 s^-1  | 0.35 s^-1  | 2 uM       | 0.35 s^-1  | 4      |
| A831*845*_B831* ---PP1-active_PSD-> A845*_B831*          | 0.14583 #^-1.s^-1    | 1.4 s^-1  | 0.35 s^-1  | 2 uM       | 0.35 s^-1  | 4      |
| A831*_B831* ---PP1-active_PSD-> A_B831*                  | 0.14583 #^-1.s^-1    | 1.4 s^-1  | 0.35 s^-1  | 2 uM       | 0.35 s^-1  | 4      |
| A835*845*_B835*845* ---PP1-active_PSD-> A831*845*_B845*  | 0.14583 #^-1.s^-1    | 1.4 s^-1  | 0.35 s^-1  | 2 uM       | 0.35 s^-1  | 4      |
| A831*_B831*845* ---PP1-active_PSD-> A831*_B845*          | 0.14583 #^-1.s^-1    | 1.4 s^-1  | 0.35 s^-1  | 2 uM       | 0.35 s^-1  | 4      |
| A831*845*_B831* ---PP1-active_PSD-> A831*845*_B          | 0.14583 #^-1.s^-1    | 1.4 s^-1  | 0.35 s^-1  | 2 uM       | 0.35 s^-1  | 4      |
| A831*_B831* ---PP1-active_PSD-> A831*_B                  | 0.14583 #^-1.s^-1    | 1.4 s^-1  | 0.35 s^-1  | 2 uM       | 0.35 s^-1  | 4      |
| CaMKII-thr305-PSD ---PP1-active_PSD-> CaMKII-PSD         | 0.40857 #^-1.s^-1    | 10 s^-1   | 2.5 s^-1   | 5.0991 uM  | 2.5 s^-1   | 4      |

Pools for group /###/

| name                     | InitialConc | buffered | Volume  |
|--------------------------|-------------|----------|---------|
| Ca                       | 0.08 uM     | 0        | 0.09 fl |
| Ca-PSD                   | 0.08 uM     | 0        | 0.01 fl |
| PKC-active               | 0.1 uM      | 0        | 0.09 fl |
| PKC-control              | 0.1 uM      | 1        | 0.09 fl |
| Ca_control_cyt           | 0.08 uM     | 1        | 0.09 fl |
| Ca_control_PSD           | 0.08 uM     | 1        | 0.01 fl |
| CaMKII                   | 20 uM       | 0        | 0.09 fl |
| CaMKII-CaM               | 0 uM        | 0        | 0.09 fl |
| CaMKII-thr286-CaM        | 0 uM        | 0        | 0.09 fl |
| CaMKII***                | 0 uM        | 0        | 0.09 fl |
| CaMKII-thr286            | 0 uM        | 0        | 0.09 fl |
| tot_CaM_CaMKII           | 0 uM        | 0        | 0.09 fl |
| tot_autonomous_CaMKII    | 2 uM        | 0        | 0.09 fl |
| CaMK-thr305              | 0 uM        | 0        | 0.09 fl |
| tot_CaMKII_cyt           | 22 uM       | 0        | 0.09 fl |
| act_CaMKII_cyt           | 2 uM        | 0        | 0.09 fl |
| basal_CaMKII_cyt         | 2 uM        | 1        | 0.09 fl |
| basal_CaMKII_PSD_control | 2 uM        | 1        | 0.01 fl |
| CaMKII-thr305-PSD        | 0 uM        | 0        | 0.01 fl |
| CaMKII***-PSD            | 0 uM        | 0        | 0.01 fl |
| CaMKII-PSD               | 0 uM        | 0        | 0.01 fl |
| NMDAR                    | 120 uM      | 0        | 0.01 fl |
| CaMKII-thr286-PSD        | 0 uM        | 0        | 0.01 fl |
| CaMKII-CaM-PSD           | 0 uM        | 0        | 0.01 fl |
| CaMKII-thr286-CaM-PSD    | 0 uM        | 0        | 0.01 fl |
| tot-auto-PSD             | 2 uM        | 0        | 0.01 fl |
| basal_CaMKII_PSD         | 2 uM        | 0        | 0.01 fl |
| tot_CaMKII_PSD           | 2 uM        | 0        | 0.01 fl |
| actCaMKII-PSD            | 2 uM        | 0        | 0.01 fl |
| tot-CaM-CaMKII-PSD       | 0 uM        | 0        | 0.01 fl |
| 286P-PSD                 | 0 uM        | 0        | 0.01 fl |
| CaM                      | 26.333 uM   | 0        | 0.09 fl |
| neurogranin-CaM          | 0 uM        | 0        | 0.09 fl |
| neurogranin*             | 0 uM        | 0        | 0.09 fl |
| neurogranin              | 10 uM       | 0        | 0.09 fl |
| CaM-PSD                  | 26.333 uM   | 0        | 0.01 fl |
| neurogranin-CaM_PSD      | 0 uM        | 0        | 0.01 fl |
| neurogranin_PSD          | 10 uM       | 0        | 0.01 fl |
| neurogranin*_PSD         | 0 uM        | 0        | 0.01 fl |
| CaM-TR2-Ca2              | 0 uM        | 0        | 0.09 fl |
| CaM-Ca3                  | 0 uM        | 0        | 0.09 fl |
| CaM-Ca4-PSD              | 0 uM        | 0        | 0.01 fl |
| CaM-Ca3-PSD              | 0 uM        | 0        | 0.01 fl |
| CaM-TR2-Ca2-PSD          | 0 uM        | 0        | 0.01 fl |
| CaM-Ca4                  | 0 uM        | 0        | 0.09 fl |
| I1                       | 1.8 uM      | 0        | 0.09 fl |
| I1*                      | 0 uM        | 0        | 0.09 fl |

|                     |             |   |         |
|---------------------|-------------|---|---------|
| PP1-I1*             | 0 uM        | 0 | 0.09 fl |
| PP1-I1              | 0 uM        | 0 | 0.09 fl |
| PP2A                | 0.11111 uM  | 0 | 0.09 fl |
| PP1-active          | 1.8 uM      | 0 | 0.09 fl |
| CaNAB               | 1 uM        | 0 | 0.09 fl |
| CaNAB-Ca2           | 0 uM        | 0 | 0.09 fl |
| CaNAB-Ca4           | 0 uM        | 0 | 0.09 fl |
| CaM_Ca_n-CaNAB      | 0 uM        | 0 | 0.09 fl |
| R2C2                | 0.5 uM      | 0 | 0.09 fl |
| R2C2-cAMP           | 0 uM        | 0 | 0.09 fl |
| R2C2-cAMP2          | 0 uM        | 0 | 0.09 fl |
| R2C2-cAMP3          | 0 uM        | 0 | 0.09 fl |
| R2C2-cAMP4          | 0 uM        | 0 | 0.09 fl |
| R2C-cAMP4           | 0 uM        | 0 | 0.09 fl |
| R2-cAMP4            | 0 uM        | 0 | 0.09 fl |
| PKA-inhibitor       | 0.25926 uM  | 0 | 0.09 fl |
| inhibited-PKA       | 0 uM        | 0 | 0.09 fl |
| PKA-active          | 0 uM        | 0 | 0.09 fl |
| ATP                 | 2000 uM     | 1 | 0.09 fl |
| AC1-CaM             | 0 uM        | 0 | 0.09 fl |
| AC1                 | 0.074074 uM | 0 | 0.09 fl |
| AC2*                | 0 uM        | 0 | 0.09 fl |
| AC2                 | 0.074074 uM | 0 | 0.09 fl |
| AMP                 | 0 uM        | 0 | 0.09 fl |
| cAMP-PDE            | 0.55556 uM  | 0 | 0.09 fl |
| cAMP-PDE*           | 0 uM        | 0 | 0.09 fl |
| PDE1                | 2.5926 uM   | 0 | 0.09 fl |
| CaM.PDE1            | 0 uM        | 0 | 0.09 fl |
| cAMP_in_dend        | 0 uM        | 0 | 5 fl    |
| cAMP                | 0 uM        | 0 | 0.09 fl |
| I1                  | 4 uM        | 0 | 0.01 fl |
| I1*                 | 0 uM        | 0 | 0.01 fl |
| PP1-I1*             | 0 uM        | 0 | 0.01 fl |
| PP1-I1              | 0 uM        | 0 | 0.01 fl |
| PP1-active_PSD      | 4 uM        | 0 | 0.01 fl |
| GluR23_I            | 0.092593 uM | 0 | 0.09 fl |
| AMPA_deg            | 0 uM        | 1 | 0.09 fl |
| A_B                 | 0 uM        | 0 | 0.09 fl |
| A831*_B             | 0 uM        | 0 | 0.09 fl |
| A845*_B             | 0 uM        | 0 | 0.09 fl |
| A831*845*_B         | 0 uM        | 0 | 0.09 fl |
| A_B845*             | 0 uM        | 0 | 0.09 fl |
| AA831*_B845*        | 0 uM        | 0 | 0.09 fl |
| A845*_B845*         | 0 uM        | 0 | 0.09 fl |
| A831*845*_B845*     | 0 uM        | 0 | 0.09 fl |
| A845*_B831*845*     | 0 uM        | 0 | 0.09 fl |
| A835*845*_B835*845* | 0 uM        | 0 | 0.09 fl |
| A_B831*845*         | 0 uM        | 0 | 0.09 fl |
| A831*_B831*845*     | 0 uM        | 0 | 0.09 fl |
| A_B831*             | 0 uM        | 0 | 0.09 fl |
| A845*_B831*         | 0 uM        | 0 | 0.01 fl |
| A831*_B831*         | 0 uM        | 0 | 0.09 fl |
| A831*845*_B831*     | 0 uM        | 0 | 0.09 fl |
| AMPA_bulk           | 0.011111 uM | 1 | 5 fl    |
| I_845               | 0 uM        | 0 | 0.09 fl |
| I_845-P             | 0 uM        | 0 | 0.09 fl |
| I_845_PP            | 0 uM        | 0 | 0.09 fl |
| tot_L_GluR12        | 0 uM        | 0 | 0.09 fl |
| total_int           | 0.096296 uM | 0 | 0.09 fl |
| A_B                 | 0 uM        | 0 | 0.01 fl |
| A831*_B             | 0 uM        | 0 | 0.01 fl |
| A_B831*             | 0 uM        | 0 | 0.01 fl |
| A831*_B831*         | 0 uM        | 0 | 0.01 fl |
| A845*_B             | 0 uM        | 0 | 0.01 fl |
| A831*845*_B         | 0 uM        | 0 | 0.01 fl |
| A831*845*_B831*     | 0 uM        | 0 | 0.01 fl |
| A_B845*             | 0 uM        | 0 | 0.01 fl |
| A845*_B831*         | 0 uM        | 0 | 0.01 fl |
| A845*_B845*         | 0 uM        | 0 | 0.01 fl |
| A831*_B845*         | 0 uM        | 0 | 0.01 fl |
| A_B831*845*         | 0 uM        | 0 | 0.01 fl |
| A831*_B831*845*     | 0 uM        | 0 | 0.01 fl |
| A845*_B831*845*     | 0 uM        | 0 | 0.01 fl |
| A835*845*_B835*845* | 0 uM        | 0 | 0.01 fl |
| GluR23_M            | 3.5 uM      | 0 | 0.01 fl |
| Ser845-PP           | 0 uM        | 0 | 0.01 fl |
| Ser845-P            | 0 uM        | 0 | 0.01 fl |
| Ser845              | 0 uM        | 0 | 0.01 fl |
| tot_mem_GluR12      | 0 uM        | 0 | 0.01 fl |
| total_mem           | 3.4667 uM   | 0 | 0.01 fl |
| Ser831              | 0 uM        | 0 | 0.01 fl |
| Ser831-P            | 0 uM        | 0 | 0.01 fl |
| Ser831-PP           | 0 uM        | 0 | 0.01 fl |
| Anchor              | 27.333 uM   | 0 | 0.01 fl |

-----

Model Parameters for simplified AMPAR bistability model: Model 2.

Concentration units: uM (micromolar) for rate constants presented as Kf, Kb, Km  
 #/cell for rate constants presented as kf, kb, k1, k2, k3. This formulation of rates may depend on cellular volume.

Molecular traffic between compartments of different volumes is represented as reactions. These reactions may have concentration terms which are ambiguous if expressed in uM. Please use the concentration terms involving #/cell for such reactions.

Time units: Seconds in all cases.

Total Volume of Synapse = 0.1 femtoliters (fl)

Volume of cytosolic portion = 0.09 fl

Volume of Postsynaptic Density (PSD) = 0.01 fl

The enzyme rates are related as follows:

$Km = (k2 + k3)/k1$  (after conversion of units)

$Kcat = k3$ .

Ratio =  $k2/k3$

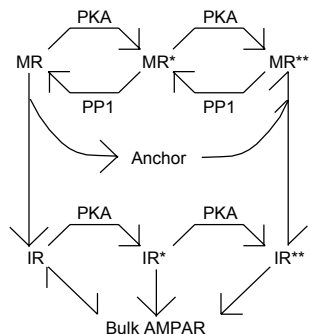

Reactions

| Reaction                  | kf               | kb          | Kf                | Kb           |                |
|---------------------------|------------------|-------------|-------------------|--------------|----------------|
| Anchor + IR** <====> MR** | 0.0002 #^-1.s^-1 | 0.008 s^-1  | 0.0012 uM^-1.s^-1 | 0.008 s^-1   | Traffic Reacn. |
| MR <====> Anchor + IR     | 0.0008 s^-1      | 0 #^-1.s^-1 | 0.0008 s^-1       | 0 uM^-1.s^-1 | Traffic Reacn. |
| Bulk_AMPAR <====> IR      | 0.018 s^-1       | 1 s^-1      | 0.018 s^-1        | 1 s^-1       | Traffic Reacn. |
| IR** <====> Bulk_AMPAR    | 2e-05 s^-1       | 0 s^-1      | 2e-05 s^-1        | 0 s^-1       |                |
| IR* <====> Bulk_AMPAR     | 2e-05 s^-1       | 0 s^-1      | 2e-05 s^-1        | 0 s^-1       |                |

Enzyme activities

| Enzyme-reaction           | k1                | k2       | k3        | Km         | kcat      | ratio |
|---------------------------|-------------------|----------|-----------|------------|-----------|-------|
| MR ---PKA-active--> MR*   | 0.14815 #^-1.s^-1 | 24 s^-1  | 6 s^-1    | 3.75 uM    | 6 s^-1    | 4     |
| IR ---PKA-active--> IR*   | 0.14815 #^-1.s^-1 | 24 s^-1  | 6 s^-1    | 3.75 uM    | 6 s^-1    | 4     |
| MR* ---PKA-active--> MR** | 0.14815 #^-1.s^-1 | 24 s^-1  | 6 s^-1    | 3.75 uM    | 6 s^-1    | 4     |
| IR* ---PKA-active--> IR** | 0.14815 #^-1.s^-1 | 24 s^-1  | 6 s^-1    | 3.75 uM    | 6 s^-1    | 4     |
| MR* ---PP1-active--> MR   | 0.29167 #^-1.s^-1 | 1.4 s^-1 | 0.35 s^-1 | 0.99999 uM | 0.35 s^-1 | 4     |
| MR** ---PP1-active--> MR* | 0.29167 #^-1.s^-1 | 1.4 s^-1 | 0.35 s^-1 | 0.99999 uM | 0.35 s^-1 | 4     |

Pools

| name       | InitialConc | buffered | Volume  |
|------------|-------------|----------|---------|
| PKA-active | 0.018519 uM | 1        | 0.09 fl |
| Anchor     | 27.333 uM   | 0        | 0.01 fl |
| Bulk_AMPAR | 0.003 uM    | 1        | 5 fl    |
| PP1-active | 0.33333 uM  | 0        | 0.01 fl |
| MR*        | 0 uM        | 0        | 0.01 fl |
| MR         | 0 uM        | 0        | 0.01 fl |
| MR**       | 0 uM        | 0        | 0.01 fl |
| IR**       | 0 uM        | 0        | 0.09 fl |
| IR         | 0 uM        | 0        | 0.09 fl |
| IR*        | 0 uM        | 0        | 0.09 fl |



Equations for all groups

Reactions

| Reaction                                                     | kf                  | kb                | Kf                 | Kb               |                  |
|--------------------------------------------------------------|---------------------|-------------------|--------------------|------------------|------------------|
| CaMKII-PSD + CaM-Ca4-PSD <====> CaMKII-CaM-PSD               | 8.3333 #^-1.s^-1    | 0 s^-1            | 50 uM^-1.s^-1      | 0 s^-1           |                  |
| CaMKII-CaM + NMDAR <====> CaMKII-CaM-PSD                     | 2e-05 #^-1.s^-1     | 0 s^-1            | 0.00108 uM^-1.s^-1 | 0 s^-1           | Trafficking reac |
| CaMKII-thr286*-CaM + NMDAR <====> CaMKII-thr286-CaM-PSD      | 2e-05 #^-1.s^-1     | 0 s^-1            | 0.00108 uM^-1.s^-1 | 0 s^-1           | Trafficking reac |
| CaMKII-PSD <====> CaMKII + NMDAR                             | 0.3 s^-1            | 1e-05 #^-1.s^-1   | 0.3 s^-1           | 6e-05 uM^-1.s^-1 | Trafficking reac |
| CaMKII-thr305-PSD <====> CaMK-thr305 + NMDAR                 | 0.3 s^-1            | 1e-05 #^-1.s^-1   | 0.3 s^-1           | 6e-05 uM^-1.s^-1 | Trafficking reac |
| CaMKII-thr286-PSD + CaM-Ca4-PSD <====> CaMKII-thr286-CaM-PSD | 166.67 #^-1.s^-1    | 0.1 s^-1          | 1000 uM^-1.s^-1    | 0.1 s^-1         |                  |
| CaM-Ca4-PSD <====> CaM-Ca4                                   | 540 s^-1            | 60 s^-1           | 540 s^-1           | 60 s^-1          | Trafficking reac |
| I1* + PP1-active_PSD <====> PP1-I1*                          | 83.33 #^-1.s^-1     | 0.1 s^-1          | 499.98 uM^-1.s^-1  | 0.1 s^-1         |                  |
| CaM-Ca3 + Ca <====> CaM-Ca4                                  | 0.0086111 #^-1.s^-1 | 10 s^-1           | 0.465 uM^-1.s^-1   | 10 s^-1          |                  |
| CaMKII-CaM-PSD <====> CaM-Ca4-PSD + CaMKII-PSD               | 5 s^-1              | 0 #^-1.s^-1       | 5 s^-1             | 0 uM^-1.s^-1     |                  |
| Ca_control_cyt <====> Ca                                     | 100 s^-1            | 100 s^-1          | 100 s^-1           | 100 s^-1         |                  |
| Ca_control_PSD <====> Ca-PSD                                 | 100 s^-1            | 100 s^-1          | 100 s^-1           | 100 s^-1         |                  |
| basal_CaMKII_PSD_control <====> basal_CaMKII_PSD             | 1 s^-1              | 1 s^-1            | 1 s^-1             | 1 s^-1           |                  |
| PKC-control <====> PKC-active                                | 2.5 s^-1            | 2.5 s^-1          | 2.5 s^-1           | 2.5 s^-1         |                  |
| CaM-Ca4 + CaMKII <====> CaMKII-CaM                           | 0.92592 #^-1.s^-1   | 5 s^-1            | 50 uM^-1.s^-1      | 5 s^-1           |                  |
| CaMKII-thr286 + CaM-Ca4 <====> CaMKII-thr286*-CaM            | 18.522 #^-1.s^-1    | 0.1 s^-1          | 1000.2 uM^-1.s^-1  | 0.1 s^-1         |                  |
| CaM + 2 Ca <====> CaM-TR2-Ca2                                | 0.024691 #^-2.s^-1  | 72 s^-1           | 71.999 uM^-2.s^-1  | 72 s^-1          |                  |
| CaM-TR2-Ca2 + Ca <====> CaM-Ca3                              | 0.066667 #^-1.s^-1  | 10 s^-1           | 3.6 uM^-1.s^-1     | 10 s^-1          |                  |
| CaM-PSD + 2 Ca-PSD <====> CaM-TR2-Ca2-PSD                    | 2 #^-2.s^-1         | 72 s^-1           | 72 uM^-2.s^-1      | 72 s^-1          |                  |
| CaM-TR2-Ca2-PSD + Ca-PSD <====> CaM-Ca3-PSD                  | 0.6 #^-1.s^-1       | 10 s^-1           | 3.6 uM^-1.s^-1     | 10 s^-1          |                  |
| CaM-Ca3-PSD + Ca-PSD <====> CaM-Ca4-PSD                      | 0.077502 #^-1.s^-1  | 10 s^-1           | 0.46501 uM^-1.s^-1 | 10 s^-1          |                  |
| I1* + PP1-active <====> PP1-I1*                              | 9.2589 #^-1.s^-1    | 0.1 s^-1          | 499.98 uM^-1.s^-1  | 0.1 s^-1         |                  |
| PP1-I1 <====> PP1-active + I1                                | 1 s^-1              | 0 #^-1.s^-1       | 1 s^-1             | 0 uM^-1.s^-1     |                  |
| 2 Ca + CaNAB-Ca2 <====> CaNAB-Ca4                            | 0.0012346 #^-2.s^-1 | 1 s^-1            | 3.6001 uM^-2.s^-1  | 1 s^-1           |                  |
| CaNAB + 2 Ca <====> CaNAB-Ca2                                | 3.4321 #^-2.s^-1    | 1 s^-1            | 10008 uM^-2.s^-1   | 1 s^-1           |                  |
| CaM-Ca4 + CaNAB-Ca4 <====> CaM_Ca_n-CaNAB                    | 11.111 #^-1.s^-1    | 1 s^-1            | 599.99 uM^-1.s^-1  | 1 s^-1           |                  |
| PP1-I1 <====> I1 + PP1-active_PSD                            | 1 s^-1              | 0 #^-1.s^-1       | 1 s^-1             | 0 uM^-1.s^-1     |                  |
| CaM-Ca4 + AC1 <====> AC1-CaM                                 | 0.92592 #^-1.s^-1   | 1 s^-1            | 50 uM^-1.s^-1      | 1 s^-1           |                  |
| AC2* <====> AC2                                              | 0.1 s^-1            | 0 s^-1            | 0.1 s^-1           | 0 s^-1           |                  |
| cAMP-PDE* <====> cAMP-PDE                                    | 0.01 s^-1           | 0 s^-1            | 0.01 s^-1          | 0 s^-1           |                  |
| PDE1 + CaM-Ca4 <====> CaM.PDE1                               | 13.333 #^-1.s^-1    | 5 s^-1            | 719.98 uM^-1.s^-1  | 5 s^-1           |                  |
| cAMP <====> cAMP_in_dend                                     | 300 s^-1            | 5.4 s^-1          | 300 s^-1           | 5.4 s^-1         |                  |
| R2C2 + cAMP <====> R2C2-cAMP                                 | 1 #^-1.s^-1         | 33 s^-1           | 54 uM^-1.s^-1      | 33 s^-1          |                  |
| R2C2-cAMP + cAMP <====> R2C2-cAMP2                           | 1 #^-1.s^-1         | 33 s^-1           | 54 uM^-1.s^-1      | 33 s^-1          |                  |
| R2C2-cAMP2 + cAMP <====> R2C2-cAMP3                          | 1.3889 #^-1.s^-1    | 110 s^-1          | 75.001 uM^-1.s^-1  | 110 s^-1         |                  |
| cAMP + R2C2-cAMP3 <====> R2C2-cAMP4                          | 1.3889 #^-1.s^-1    | 32.5 s^-1         | 75.001 uM^-1.s^-1  | 32.5 s^-1        |                  |
| R2C2-cAMP4 <====> PKA-active + R2C-cAMP4                     | 60 s^-1             | 0.33333 #^-1.s^-1 | 60 s^-1            | 18 uM^-1.s^-1    |                  |
| R2C-cAMP4 <====> PKA-active + R2-cAMP4                       | 60 s^-1             | 0.33333 #^-1.s^-1 | 60 s^-1            | 18 uM^-1.s^-1    |                  |
| PKA-active + PKA-inhibitor <====> inhibited-PKA              | 1.1111 #^-1.s^-1    | 1 s^-1            | 59.999 uM^-1.s^-1  | 1 s^-1           |                  |



## Enzymes for group ##[]

| Enzyme-reaction                                               | k1                   | k2          | k3         | Km        | kcat       | ratio  |
|---------------------------------------------------------------|----------------------|-------------|------------|-----------|------------|--------|
| CaMKII-thr286*-CaM ---PP1-active--> CaMKII-CaM                | 0.045397 #^-1.s^-1   | 10 s^-1     | 2.5 s^-1   | 5.099 uM  | 2.5 s^-1   | 4      |
| CaMKII-thr286 ---PP1-active--> CaMKII                         | 0.045397 #^-1.s^-1   | 10 s^-1     | 2.5 s^-1   | 5.099 uM  | 2.5 s^-1   | 4      |
| CaMKII*** ---PP1-active--> CaMKII-thr286                      | 0.045397 #^-1.s^-1   | 10 s^-1     | 2.5 s^-1   | 5.099 uM  | 2.5 s^-1   | 4      |
| CaMKII*** ---PP1-active--> CaMK-thr305                        | 0.045397 #^-1.s^-1   | 10 s^-1     | 2.5 s^-1   | 5.099 uM  | 2.5 s^-1   | 4      |
| CaMK-thr305 ---PP1-active--> CaMKII                           | 0.045397 #^-1.s^-1   | 10 s^-1     | 2.5 s^-1   | 5.099 uM  | 2.5 s^-1   | 4      |
| I1 ---PKA-active--> I1*                                       | 0.11111 #^-1.s^-1    | 36 s^-1     | 9 s^-1     | 7.5001 uM | 9 s^-1     | 4      |
| I1 ---PKA-active--> I1*                                       | 0.11111 #^-1.s^-1    | 36 s^-1     | 9 s^-1     | 7.5001 uM | 9 s^-1     | 4      |
| cAMP-PDE ---PKA-active--> cAMP-PDE*                           | 0.11111 #^-1.s^-1    | 36 s^-1     | 9 s^-1     | 7.5001 uM | 9 s^-1     | 4      |
| I1* ---PP2A--> I1                                             | 0.01196 #^-1.s^-1    | 8.3334 s^-1 | 2 s^-1     | 16 uM     | 2 s^-1     | 4.1667 |
| PP1-I1* ---PP2A--> PP1-I1                                     | 0.01196 #^-1.s^-1    | 8.3334 s^-1 | 2 s^-1     | 16 uM     | 2 s^-1     | 4.1667 |
| I1* ---PP2A--> I1                                             | 0.01196 #^-1.s^-1    | 8.3334 s^-1 | 2 s^-1     | 16 uM     | 2 s^-1     | 4.1667 |
| PP1-I1* ---PP2A--> PP1-I1                                     | 0.01196 #^-1.s^-1    | 8.3334 s^-1 | 2 s^-1     | 16 uM     | 2 s^-1     | 4.1667 |
| I1* ---CaNAB-Ca4--> I1                                        | 0.00063333 #^-1.s^-1 | 0.136 s^-1  | 0.034 s^-1 | 4.9708 uM | 0.034 s^-1 | 4      |
| I1* ---CaNAB-Ca4--> I1                                        | 0.00063333 #^-1.s^-1 | 0.136 s^-1  | 0.034 s^-1 | 4.9707 uM | 0.034 s^-1 | 4      |
| CaMKII-thr286-PSD ---tot-auto-PSD--> CaMKII***-PSD            | 0.01 #^-1.s^-1       | 24 s^-1     | 6 s^-1     | 500 uM    | 6 s^-1     | 4      |
| CaMKII-CaM-PSD ---tot-auto-PSD--> CaMKII-thr286-CaM-PSD       | 0.00083333 #^-1.s^-1 | 2 s^-1      | 0.5 s^-1   | 500 uM    | 0.5 s^-1   | 4      |
| CaMKII-PSD ---tot-auto-PSD--> CaMKII-thr286-PSD               | 0.0033333 #^-1.s^-1  | 8 s^-1      | 2 s^-1     | 500.01 uM | 2 s^-1     | 4      |
| CaMKII-thr286-CaM-PSD ---PP1-active_PSD--> CaMKII-CaM-PSD     | 0.083333 #^-1.s^-1   | 0.8 s^-1    | 0.2 s^-1   | 2 uM      | 0.2 s^-1   | 4      |
| CaMKII-thr286-PSD ---PP1-active_PSD--> CaMKII-PSD             | 0.083333 #^-1.s^-1   | 0.8 s^-1    | 0.2 s^-1   | 2 uM      | 0.2 s^-1   | 4      |
| CaMKII***-PSD ---PP1-active_PSD--> CaMKII-thr286-PSD          | 0.083333 #^-1.s^-1   | 0.8 s^-1    | 0.2 s^-1   | 2 uM      | 0.2 s^-1   | 4      |
| CaMKII***-PSD ---PP1-active_PSD--> CaMKII-thr305-PSD          | 0.083333 #^-1.s^-1   | 0.8 s^-1    | 0.2 s^-1   | 2 uM      | 0.2 s^-1   | 4      |
| CaMKII-thr305-PSD ---PP1-active_PSD--> CaMKII-PSD             | 0.083333 #^-1.s^-1   | 0.8 s^-1    | 0.2 s^-1   | 2 uM      | 0.2 s^-1   | 4      |
| I1* ---CaM_Ca_n-CaNAB--> I1                                   | 0.0063333 #^-1.s^-1  | 1.36 s^-1   | 0.34 s^-1  | 4.9708 uM | 0.34 s^-1  | 4      |
| PP1-I1* ---CaM_Ca_n-CaNAB--> PP1-I1                           | 0.0063333 #^-1.s^-1  | 1.36 s^-1   | 0.34 s^-1  | 4.9708 uM | 0.34 s^-1  | 4      |
| I1* ---CaM_Ca_n-CaNAB--> I1                                   | 0.0063333 #^-1.s^-1  | 1.36 s^-1   | 0.34 s^-1  | 4.9707 uM | 0.34 s^-1  | 4      |
| PP1-I1* ---CaM_Ca_n-CaNAB--> PP1-I1                           | 0.0063333 #^-1.s^-1  | 1.36 s^-1   | 0.34 s^-1  | 4.9707 uM | 0.34 s^-1  | 4      |
| CaMKII-thr286-PSD ---tot-CaM-CaMKII-PSD--> CaMKII***-PSD      | 0.015625 #^-1.s^-1   | 24 s^-1     | 6 s^-1     | 320 uM    | 6 s^-1     | 4      |
| CaMKII-CaM-PSD ---tot-CaM-CaMKII-PSD--> CaMKII-thr286-CaM-PSD | 0.0013021 #^-1.s^-1  | 2 s^-1      | 0.5 s^-1   | 320 uM    | 0.5 s^-1   | 4      |
| CaMKII-PSD ---tot-CaM-CaMKII-PSD--> CaMKII-thr286-PSD         | 0.0052083 #^-1.s^-1  | 8 s^-1      | 2 s^-1     | 320 uM    | 2 s^-1     | 4      |
| AC2 ---PKC-active--> AC2*                                     | 0.011111 #^-1.s^-1   | 16 s^-1     | 4 s^-1     | 33.334 uM | 4 s^-1     | 4      |
| CaMKII-thr286 ---tot_CaM_CaMKII--> CaMKII***                  | 0.0024474 #^-1.s^-1  | 24 s^-1     | 6 s^-1     | 227 uM    | 6 s^-1     | 4      |
| CaMKII-CaM ---tot_CaM_CaMKII--> CaMKII-thr286*-CaM            | 0.00020395 #^-1.s^-1 | 2 s^-1      | 0.5 s^-1   | 227 uM    | 0.5 s^-1   | 4      |
| CaMKII-thr286 ---tot_autonomous_CaMKII--> CaMKII***           | 0.0015873 #^-1.s^-1  | 24 s^-1     | 6 s^-1     | 350 uM    | 6 s^-1     | 4      |
| CaMKII-CaM ---tot_autonomous_CaMKII--> CaMKII-thr286*-CaM     | 0.00013228 #^-1.s^-1 | 2 s^-1      | 0.5 s^-1   | 349.99 uM | 0.5 s^-1   | 4      |
| ATP ---AC1-CaM--> cAMP                                        | 0.0013889 #^-1.s^-1  | 18 s^-1     | 4.5 s^-1   | 300 uM    | 4.5 s^-1   | 4      |
| ATP ---AC2*-> cAMP                                            | 0.00061728 #^-1.s^-1 | 8 s^-1      | 2 s^-1     | 300 uM    | 2 s^-1     | 4      |
| cAMP ---cAMP-PDE--> AMP                                       | 0.046667 #^-1.s^-1   | 40 s^-1     | 10 s^-1    | 19.841 uM | 10 s^-1    | 4      |
| cAMP ---cAMP-PDE*-> AMP                                       | 0.093333 #^-1.s^-1   | 80 s^-1     | 20 s^-1    | 19.841 uM | 20 s^-1    | 4      |
| cAMP ---PDE1--> AMP                                           | 0.0038889 #^-1.s^-1  | 6.67 s^-1   | 1.667 s^-1 | 39.7 uM   | 1.667 s^-1 | 4.0012 |
| cAMP ---CaM.PDE1--> AMP                                       | 0.023333 #^-1.s^-1   | 40 s^-1     | 10 s^-1    | 39.683 uM | 10 s^-1    | 4      |

| Pools for group ###[]    | InitialConc  | buffered | Volume  |
|--------------------------|--------------|----------|---------|
| name                     |              |          |         |
| CaM-Ca4                  | 0 uM         | 0        | 0.09 fl |
| PP1-active               | 1.8 uM       | 0        | 0.09 fl |
| Ca                       | 0.08 uM      | 0        | 0.09 fl |
| PKA-active               | 0 uM         | 0        | 0.09 fl |
| CaM-Ca3                  | 0 uM         | 0        | 0.09 fl |
| CaM-TR2-Ca2              | 0 uM         | 0        | 0.09 fl |
| PP2A                     | 0.11111 uM   | 0        | 0.09 fl |
| CaNAB-Ca4                | 0 uM         | 0        | 0.09 fl |
| CaMKII-thr286-CaM-PSD    | 0 uM         | 0        | 0.01 fl |
| CaMKII-CaM-PSD           | 0 uM         | 0        | 0.01 fl |
| CaMKII-thr286-PSD        | 0 uM         | 0        | 0.01 fl |
| CaMKII-PSD               | 0 uM         | 0        | 0.01 fl |
| CaMKII***-PSD            | 0 uM         | 0        | 0.01 fl |
| tot-auto-PSD             | 2 uM         | 0        | 0.01 fl |
| CaM-TR2-Ca2-PSD          | 0 uM         | 0        | 0.01 fl |
| CaM-Ca3-PSD              | 0.0025458 uM | 0        | 0.01 fl |
| CaM-Ca4-PSD              | 0 uM         | 0        | 0.01 fl |
| Ca-PSD                   | 0.08 uM      | 0        | 0.01 fl |
| 286P-PSD                 | 0 uM         | 0        | 0.01 fl |
| actCaMKII-PSD            | 2 uM         | 0        | 0.01 fl |
| tot_CaMKII_PSD           | 2 uM         | 0        | 0.01 fl |
| tot_CaMKII_cyt           | 22 uM        | 0        | 0.09 fl |
| PP1-active_PSD           | 4 uM         | 0        | 0.01 fl |
| act_CaMKII_cyt           | 2 uM         | 0        | 0.09 fl |
| NMDAR                    | 120 uM       | 0        | 0.01 fl |
| CaM_Ca_n-CaNAB           | 0 uM         | 0        | 0.09 fl |
| basal_CaMKII_cyt         | 2 uM         | 1        | 0.09 fl |
| basal_CaMKII_PSD         | 2 uM         | 0        | 0.01 fl |
| Ca_control_cyt           | 0.08 uM      | 1        | 0.09 fl |
| Ca_control_PSD           | 0.08 uM      | 1        | 0.01 fl |
| basal_CaMKII_PSD_control | 2 uM         | 1        | 0.01 fl |
| tot-CaM-CaMKII-PSD       | 0 uM         | 0        | 0.01 fl |
| cAMP                     | 0 uM         | 0        | 0.09 fl |
| PKC-control              | 0.1 uM       | 1        | 0.09 fl |
| PKC-active               | 0.1 uM       | 0        | 0.09 fl |
| CaMKII-thr305-PSD        | 0 uM         | 0        | 0.01 fl |
| CaMKII                   | 20 uM        | 0        | 0.09 fl |
| CaMKII-CaM               | 0 uM         | 0        | 0.09 fl |
| CaMKII-thr286*-CaM       | 0 uM         | 0        | 0.09 fl |
| CaMKII***                | 0 uM         | 0        | 0.09 fl |
| CaMKII-thr286            | 0 uM         | 0        | 0.09 fl |
| tot_CaM_CaMKII           | 0 uM         | 0        | 0.09 fl |
| tot_autonomous_CaMKII    | 2 uM         | 0        | 0.09 fl |
| CaMK-thr305              | 0 uM         | 0        | 0.09 fl |
| CaM                      | 26.333 uM    | 0        | 0.09 fl |
| CaM-PSD                  | 26.333 uM    | 0        | 0.01 fl |
| I1                       | 1.8 uM       | 0        | 0.09 fl |
| I1*                      | 0 uM         | 0        | 0.09 fl |
| PP1-I1*                  | 0 uM         | 0        | 0.09 fl |
| PP1-I1                   | 0 uM         | 0        | 0.09 fl |
| CaNAB                    | 1 uM         | 0        | 0.09 fl |
| CaNAB-Ca2                | 0 uM         | 0        | 0.09 fl |
| I1                       | 4 uM         | 0        | 0.01 fl |
| I1*                      | 0 uM         | 0        | 0.01 fl |
| PP1-I1*                  | 0 uM         | 0        | 0.01 fl |
| PP1-I1                   | 0 uM         | 0        | 0.01 fl |
| ATP                      | 2000 uM      | 1        | 0.09 fl |
| AC1-CaM                  | 0 uM         | 0        | 0.09 fl |
| AC1                      | 0.074074 uM  | 0        | 0.09 fl |
| AC2*                     | 0 uM         | 0        | 0.09 fl |
| AC2                      | 0.074074 uM  | 0        | 0.09 fl |
| AMP                      | 0 uM         | 0        | 0.09 fl |
| cAMP-PDE                 | 0.55556 uM   | 0        | 0.09 fl |
| cAMP-PDE*                | 0 uM         | 0        | 0.09 fl |
| PDE1                     | 2.5926 uM    | 0        | 0.09 fl |
| CaM.PDE1                 | 0 uM         | 0        | 0.09 fl |
| cAMP_in_dend             | 0 uM         | 0        | 5 fl    |
| R2C2                     | 0.5 uM       | 0        | 0.09 fl |
| R2C2-cAMP                | 0 uM         | 0        | 0.09 fl |
| R2C2-cAMP2               | 0 uM         | 0        | 0.09 fl |
| R2C2-cAMP3               | 0 uM         | 0        | 0.09 fl |
| R2C2-cAMP4               | 0 uM         | 0        | 0.09 fl |
| R2C-cAMP4                | 0 uM         | 0        | 0.09 fl |
| R2-cAMP4                 | 0 uM         | 0        | 0.09 fl |
| PKA-inhibitor            | 0.25926 uM   | 0        | 0.09 fl |
| inhibited-PKA            | 0 uM         | 0        | 0.09 fl |

Model Parameters for model where AMPAR and CaMKII bistability occurs in lockstep: Model 4.

Concentration units: uM (micromolar) for rate constants presented as Kf, Kb, Km

#/cell for rate constants presented as kf, kb, k1, k2, k3. This formulation of rates may depend on cellular volume.

A few reactions represent traffic between compartments of different volumes. Where such reactions involve concentration units, please use the #/cell rate terms as the are unambiguous.

Time units: Seconds in all cases.

Total Volume of Synapse = 0.1 femtoliters (fl)

Volume of cytosolic portion = 0.09 fl

Volume of Postsynaptic Density (PSD) = 0.01 fl

The enzyme rates are related as follows:

Km = (k2 + k3)/k1 (after conversion of units)

Kcat = k3.

Ratio = k2/k3

Initial concentrations (Colnit) are mostly zero, except for a few key molecules.

There is a flag for 'buffered' in the molecule concentration table. When this flag is zero the molecule concentrations are computed according to the reaction equations. If the flag is one the molecule concentration is held fixed to its initial concentration.

The entire model scheme is presented as composite tables for molecules, reactions and enzymes.

All equations.

Reactions.

| Reaction                                                     | kf                  | kb                | Kf                 | Kb               |
|--------------------------------------------------------------|---------------------|-------------------|--------------------|------------------|
| CaMKII-PSD + CaM-Ca4-PSD <====> CaMKII-CaM-PSD               | 8.3333 #^-1.s^-1    | 0 s^-1            | 50 uM^-1.s^-1      | 0 s^-1           |
| CaMKII-CaM + NMDAR <====> CaMKII-CaM-PSD                     | 2e-05 #^-1.s^-1     | 0 s^-1            | 0.00108 uM^-1.s^-1 | 0 s^-1           |
| CaMKII-thr286*-CaM + NMDAR <====> CaMKII-thr286-CaM-PSD      | 2e-05 #^-1.s^-1     | 0 s^-1            | 0.00108 uM^-1.s^-1 | 0 s^-1           |
| CaMKII-PSD <====> CaMKII + NMDAR                             | 0.3 s^-1            | 1e-05 #^-1.s^-1   | 0.3 s^-1           | 6e-05 uM^-1.s^-1 |
| CaMKII-thr305-PSD <====> CaMKII-thr305 + NMDAR               | 0.3 s^-1            | 1e-05 #^-1.s^-1   | 0.3 s^-1           | 6e-05 uM^-1.s^-1 |
| CaMKII-thr286-PSD + CaM-Ca4-PSD <====> CaMKII-thr286-CaM-PSD | 166.67 #^-1.s^-1    | 0.1 s^-1          | 1000 uM^-1.s^-1    | 0.1 s^-1         |
| CaM-Ca4-PSD <====> CaM-Ca4                                   | 540 s^-1            | 60 s^-1           | 540 s^-1           | 60 s^-1          |
| I1* + PP1-active_PSD <====> PP1-I1*                          | 83.33 #^-1.s^-1     | 0.1 s^-1          | 499.98 uM^-1.s^-1  | 0.1 s^-1         |
| CaM-Ca3 + Ca <====> CaM-Ca4                                  | 0.0086111 #^-1.s^-1 | 10 s^-1           | 0.465 uM^-1.s^-1   | 10 s^-1          |
| GluR23_M <====> GluR23_I                                     | 0.00035 s^-1        | 0.0014 s^-1       | 0.00035 s^-1       | 0.0014 s^-1      |
| CaMKII-CaM-PSD <====> CaM-Ca4-PSD + CaMKII-PSD               | 5 s^-1              | 0 #^-1.s^-1       | 5 s^-1             | 0 uM^-1.s^-1     |
| PKC-control <====> PKC-active                                | 2.5 s^-1            | 2.5 s^-1          | 2.5 s^-1           | 2.5 s^-1         |
| Ca_control_cyt <====> Ca                                     | 100 s^-1            | 100 s^-1          | 100 s^-1           | 100 s^-1         |
| Ca_control_PSD <====> Ca-PSD                                 | 100 s^-1            | 100 s^-1          | 100 s^-1           | 100 s^-1         |
| basal_CaMKII_PSD_control <====> basal_CaMKII_PSD             | 1 s^-1              | 1 s^-1            | 1 s^-1             | 1 s^-1           |
| AMPA_R_bulk <====> A_B                                       | 0.018 s^-1          | 1 s^-1            | 0.018 s^-1         | 1 s^-1           |
| CaM-Ca4 + CaMKII <====> CaMKII-CaM                           | 0.92592 #^-1.s^-1   | 5 s^-1            | 50 uM^-1.s^-1      | 5 s^-1           |
| CaMKII-thr286 + CaM-Ca4 <====> CaMKII-thr286*-CaM            | 18.522 #^-1.s^-1    | 0.1 s^-1          | 1000.2 uM^-1.s^-1  | 0.1 s^-1         |
| CaM + 2 Ca <====> CaM-TR2-Ca2                                | 0.024691 #^-2.s^-1  | 72 s^-1           | 71.999 uM^-2.s^-1  | 72 s^-1          |
| CaM-TR2-Ca2 + Ca <====> CaM-Ca3                              | 0.066667 #^-1.s^-1  | 10 s^-1           | 3.6 uM^-1.s^-1     | 10 s^-1          |
| neurogranin + CaM <====> neurogranin-CaM                     | 0.0055556 #^-1.s^-1 | 1 s^-1            | 0.3 uM^-1.s^-1     | 1 s^-1           |
| neurogranin* <====> neurogranin                              | 0.005 s^-1          | 0 s^-1            | 0.005 s^-1         | 0 s^-1           |
| CaM-PSD + 2 Ca-PSD <====> CaM-TR2-Ca2-PSD                    | 2 #^-2.s^-1         | 72 s^-1           | 72 uM^-2.s^-1      | 72 s^-1          |
| CaM-TR2-Ca2-PSD + Ca-PSD <====> CaM-Ca3-PSD                  | 0.6 #^-1.s^-1       | 10 s^-1           | 3.6 uM^-1.s^-1     | 10 s^-1          |
| CaM-Ca3-PSD + Ca-PSD <====> CaM-Ca4-PSD                      | 0.077502 #^-1.s^-1  | 10 s^-1           | 0.46501 uM^-1.s^-1 | 10 s^-1          |
| neurogranin_PSD + CaM-PSD <====> neurogranin-CaM_PSD         | 0.05 #^-1.s^-1      | 1 s^-1            | 0.3 uM^-1.s^-1     | 1 s^-1           |
| neurogranin*_PSD <====> neurogranin_PSD                      | 0.005 s^-1          | 0 s^-1            | 0.005 s^-1         | 0 s^-1           |
| I1* + PP1-active <====> PP1-I1*                              | 9.2589 #^-1.s^-1    | 0.1 s^-1          | 499.98 uM^-1.s^-1  | 0.1 s^-1         |
| PP1-I1 <====> PP1-active + I1                                | 1 s^-1              | 0 #^-1.s^-1       | 1 s^-1             | 0 uM^-1.s^-1     |
| 2 Ca + CaNAB-Ca2 <====> CaNAB-Ca4                            | 0.0012346 #^-2.s^-1 | 1 s^-1            | 3.6001 uM^-2.s^-1  | 1 s^-1           |
| CaNAB + 2 Ca <====> CaNAB-Ca2                                | 3.4321 #^-2.s^-1    | 1 s^-1            | 10008 uM^-2.s^-1   | 1 s^-1           |
| CaM-Ca4 + CaNAB-Ca4 <====> CaM_Ca_nCaNAB                     | 11.111 #^-1.s^-1    | 1 s^-1            | 599.99 uM^-1.s^-1  | 1 s^-1           |
| R2C2 + cAMP <====> R2C2-cAMP                                 | 1 #^-1.s^-1         | 33 s^-1           | 54 uM^-1.s^-1      | 33 s^-1          |
| R2C2-cAMP + cAMP <====> R2C2-cAMP2                           | 1 #^-1.s^-1         | 33 s^-1           | 54 uM^-1.s^-1      | 33 s^-1          |
| R2C2-cAMP2 + cAMP <====> R2C2-cAMP3                          | 1.3889 #^-1.s^-1    | 110 s^-1          | 75.001 uM^-1.s^-1  | 110 s^-1         |
| cAMP + R2C2-cAMP3 <====> R2C2-cAMP4                          | 1.3889 #^-1.s^-1    | 32.5 s^-1         | 75.001 uM^-1.s^-1  | 32.5 s^-1        |
| R2C2-cAMP4 <====> PKA-active + R2C-cAMP4                     | 60 s^-1             | 0.33333 #^-1.s^-1 | 60 s^-1            | 18 uM^-1.s^-1    |
| R2C-cAMP4 <====> PKA-active + R2-cAMP4                       | 60 s^-1             | 0.33333 #^-1.s^-1 | 60 s^-1            | 18 uM^-1.s^-1    |
| PKA-active + PKA-inhibitor <====> inhibited-PKA              | 1.1111 #^-1.s^-1    | 1 s^-1            | 59.999 uM^-1.s^-1  | 1 s^-1           |
| CaM-Ca4 + AC1 <====> AC1-CaM                                 | 0.92592 #^-1.s^-1   | 1 s^-1            | 50 uM^-1.s^-1      | 1 s^-1           |
| AC2* <====> AC2                                              | 0.1 s^-1            | 0 s^-1            | 0.1 s^-1           | 0 s^-1           |
| cAMP-PDE* <====> cAMP-PDE                                    | 0.01 s^-1           | 0 s^-1            | 0.01 s^-1          | 0 s^-1           |
| PDE1 + CaM-Ca4 <====> CaM.PDE1                               | 13.333 #^-1.s^-1    | 5 s^-1            | 719.98 uM^-1.s^-1  | 5 s^-1           |
| cAMP <====> cAMP_in_dend                                     | 300 s^-1            | 5.4 s^-1          | 300 s^-1           | 5.4 s^-1         |
| PP1-I1 <====> I1 + PP1-active_PSD                            | 1 s^-1              | 0 #^-1.s^-1       | 1 s^-1             | 0 uM^-1.s^-1     |
| A831*_B831* <====> A831*_B831* + Anchor                      | 0.0008 s^-1         | 0 #^-1.s^-1       | 0.0008 s^-1        | 0 uM^-1.s^-1     |
| A_B831* <====> A_B831* + Anchor                              | 0.0008 s^-1         | 0 #^-1.s^-1       | 0.0008 s^-1        | 0 uM^-1.s^-1     |
| A831*_B <====> A831*_B + Anchor                              | 0.0008 s^-1         | 0 #^-1.s^-1       | 0.0008 s^-1        | 0 uM^-1.s^-1     |
| A_B <====> A_B + Anchor                                      | 0.0008 s^-1         | 0 #^-1.s^-1       | 0.0008 s^-1        | 0 uM^-1.s^-1     |
| A835*845*_B835*845* <====> AMPAR_deg                         | 3.6e-05 s^-1        | 0 s^-1            | 3.6e-05 s^-1       | 0 s^-1           |
| A845*_B831*845* <====> AMPAR_deg                             | 3.6e-05 s^-1        | 0 s^-1            | 3.6e-05 s^-1       | 0 s^-1           |
| A831*845*_B845* <====> AMPAR_deg                             | 3.6e-05 s^-1        | 0 s^-1            | 3.6e-05 s^-1       | 0 s^-1           |
| A845*_B845* <====> AMPAR_deg                                 | 3.6e-05 s^-1        | 0 s^-1            | 3.6e-05 s^-1       | 0 s^-1           |
| A835*845*_B835*845* + Anchor <====> A835*845*_B835*845*      | 0.0002 #^-1.s^-1    | 0.008 s^-1        | 0.0108 uM^-1.s^-1  | 0.008 s^-1       |
| A845*_B831*845* + Anchor <====> A845*_B831*845*              | 0.0002 #^-1.s^-1    | 0.008 s^-1        | 0.0108 uM^-1.s^-1  | 0.008 s^-1       |
| A831*845*_B845* + Anchor <====> A831*845*_B845*              | 0.0002 #^-1.s^-1    | 0.008 s^-1        | 0.0108 uM^-1.s^-1  | 0.008 s^-1       |
| A845*_B845* + Anchor <====> A845*_B845*                      | 0.0002 #^-1.s^-1    | 0.008 s^-1        | 0.0108 uM^-1.s^-1  | 0.008 s^-1       |



|                                                                 |                      |           |            |           |            |        |
|-----------------------------------------------------------------|----------------------|-----------|------------|-----------|------------|--------|
| A845*_B831*845* ---PP1-active_PSD--> A845*_B845*                | 0.14583 #^-1.s^-1    | 1.4 s^-1  | 0.35 s^-1  | 2 uM      | 0.35 s^-1  | 4      |
| A845*_B831* ---PP1-active_PSD--> A845*_B                        | 0.14583 #^-1.s^-1    | 1.4 s^-1  | 0.35 s^-1  | 2 uM      | 0.35 s^-1  | 4      |
| A_B831* ---PP1-active_PSD--> A_B                                | 0.14583 #^-1.s^-1    | 1.4 s^-1  | 0.35 s^-1  | 2 uM      | 0.35 s^-1  | 4      |
| A835*845*_B835*845* ---PP1-active_PSD--> A845*_B831*845*        | 0.14583 #^-1.s^-1    | 1.4 s^-1  | 0.35 s^-1  | 2 uM      | 0.35 s^-1  | 4      |
| A831*_B831*845* ---PP1-active_PSD--> A_B831*845*                | 0.14583 #^-1.s^-1    | 1.4 s^-1  | 0.35 s^-1  | 2 uM      | 0.35 s^-1  | 4      |
| A831*845*_B831* ---PP1-active_PSD--> A845*_B831*                | 0.14583 #^-1.s^-1    | 1.4 s^-1  | 0.35 s^-1  | 2 uM      | 0.35 s^-1  | 4      |
| A831*_B831* ---PP1-active_PSD--> A_B831*                        | 0.14583 #^-1.s^-1    | 1.4 s^-1  | 0.35 s^-1  | 2 uM      | 0.35 s^-1  | 4      |
| A835*845*_B835*845* ---PP1-active_PSD--> A831*845*_B845*        | 0.14583 #^-1.s^-1    | 1.4 s^-1  | 0.35 s^-1  | 2 uM      | 0.35 s^-1  | 4      |
| A831*_B831*845* ---PP1-active_PSD--> A831*_B845*                | 0.14583 #^-1.s^-1    | 1.4 s^-1  | 0.35 s^-1  | 2 uM      | 0.35 s^-1  | 4      |
| A831*845*_B831* ---PP1-active_PSD--> A831*845*_B                | 0.14583 #^-1.s^-1    | 1.4 s^-1  | 0.35 s^-1  | 2 uM      | 0.35 s^-1  | 4      |
| A831*_B831* ---PP1-active_PSD--> A831*_B                        | 0.14583 #^-1.s^-1    | 1.4 s^-1  | 0.35 s^-1  | 2 uM      | 0.35 s^-1  | 4      |
| CaMKII-thr305-PSD ---PP1-active_PSD--> CaMKII-PSD               | 0.083333 #^-1.s^-1   | 0.8 s^-1  | 0.2 s^-1   | 2 uM      | 0.2 s^-1   | 4      |
| neurogranin ---PKC-active--> neurogranin*                       | 0.0018889 #^-1.s^-1  | 2.34 s^-1 | 0.58 s^-1  | 28.627 uM | 0.58 s^-1  | 4.0345 |
| neurogranin-CaM ---PKC-active--> CaM + neurogranin*             | 0.0011333 #^-1.s^-1  | 1.4 s^-1  | 0.35 s^-1  | 28.596 uM | 0.35 s^-1  | 4      |
| AC2 ---PKC-active--> AC2*                                       | 0.011111 #^-1.s^-1   | 16 s^-1   | 4 s^-1     | 33.334 uM | 4 s^-1     | 4      |
| neurogranin_PSD ---PKC-active--> neurogranin*_PSD               | 0.0018889 #^-1.s^-1  | 2.34 s^-1 | 0.58 s^-1  | 28.627 uM | 0.58 s^-1  | 4.0345 |
| neurogranin-CaM_PSD ---PKC-active--> CaM-PSD + neurogranin*_PSD | 0.0011333 #^-1.s^-1  | 1.4 s^-1  | 0.35 s^-1  | 28.596 uM | 0.35 s^-1  | 4      |
| neurogranin* ---CaM_Ca_n-CaNAB--> neurogranin                   | 0.0061778 #^-1.s^-1  | 2.67 s^-1 | 0.67 s^-1  | 10.012 uM | 0.67 s^-1  | 3.9851 |
| I1* ---CaM_Ca_n-CaNAB--> I1                                     | 0.0063333 #^-1.s^-1  | 1.36 s^-1 | 0.34 s^-1  | 4.9708 uM | 0.34 s^-1  | 4      |
| PP1-I1* ---CaM_Ca_n-CaNAB--> PP1-I1                             | 0.0063333 #^-1.s^-1  | 1.36 s^-1 | 0.34 s^-1  | 4.9708 uM | 0.34 s^-1  | 4      |
| I1* ---CaM_Ca_n-CaNAB--> I1                                     | 0.0063334 #^-1.s^-1  | 1.36 s^-1 | 0.34 s^-1  | 4.9707 uM | 0.34 s^-1  | 4      |
| PP1-I1* ---CaM_Ca_n-CaNAB--> PP1-I1                             | 0.0063334 #^-1.s^-1  | 1.36 s^-1 | 0.34 s^-1  | 4.9707 uM | 0.34 s^-1  | 4      |
| A845*_B ---CaM_Ca_n-CaNAB--> A_B                                | 0.037256 #^-1.s^-1   | 8 s^-1    | 2 s^-1     | 4.9706 uM | 2 s^-1     | 4      |
| A831*845*_B ---CaM_Ca_n-CaNAB--> A831*_B                        | 0.037256 #^-1.s^-1   | 8 s^-1    | 2 s^-1     | 4.9706 uM | 2 s^-1     | 4      |
| A845*_B831* ---CaM_Ca_n-CaNAB--> A_B831*                        | 0.037256 #^-1.s^-1   | 8 s^-1    | 2 s^-1     | 4.9706 uM | 2 s^-1     | 4      |
| A831*845*_B831* ---CaM_Ca_n-CaNAB--> A831*_B831*                | 0.037256 #^-1.s^-1   | 8 s^-1    | 2 s^-1     | 4.9706 uM | 2 s^-1     | 4      |
| A_B845* ---CaM_Ca_n-CaNAB--> A_B                                | 0.037256 #^-1.s^-1   | 8 s^-1    | 2 s^-1     | 4.9706 uM | 2 s^-1     | 4      |
| AA831*_B845* ---CaM_Ca_n-CaNAB--> A831*_B                       | 0.037256 #^-1.s^-1   | 8 s^-1    | 2 s^-1     | 4.9706 uM | 2 s^-1     | 4      |
| A_B831*845* ---CaM_Ca_n-CaNAB--> A_B831*                        | 0.037256 #^-1.s^-1   | 8 s^-1    | 2 s^-1     | 4.9706 uM | 2 s^-1     | 4      |
| A831*_B831*845* ---CaM_Ca_n-CaNAB--> A831*_B831*                | 0.037256 #^-1.s^-1   | 8 s^-1    | 2 s^-1     | 4.9706 uM | 2 s^-1     | 4      |
| A845*_B845* ---CaM_Ca_n-CaNAB--> A_B845*                        | 0.037256 #^-1.s^-1   | 8 s^-1    | 2 s^-1     | 4.9706 uM | 2 s^-1     | 4      |
| A831*845*_B845* ---CaM_Ca_n-CaNAB--> AA831*_B845*               | 0.037256 #^-1.s^-1   | 8 s^-1    | 2 s^-1     | 4.9706 uM | 2 s^-1     | 4      |
| A845*_B831*845* ---CaM_Ca_n-CaNAB--> A_B831*845*                | 0.037256 #^-1.s^-1   | 8 s^-1    | 2 s^-1     | 4.9706 uM | 2 s^-1     | 4      |
| A835*845*_B835*845* ---CaM_Ca_n-CaNAB--> A831*_B831*845*        | 0.037256 #^-1.s^-1   | 8 s^-1    | 2 s^-1     | 4.9706 uM | 2 s^-1     | 4      |
| A845*_B845* ---CaM_Ca_n-CaNAB--> A845*_B                        | 0.037256 #^-1.s^-1   | 8 s^-1    | 2 s^-1     | 4.9706 uM | 2 s^-1     | 4      |
| A831*845*_B845* ---CaM_Ca_n-CaNAB--> A831*845*_B                | 0.037256 #^-1.s^-1   | 8 s^-1    | 2 s^-1     | 4.9706 uM | 2 s^-1     | 4      |
| A845*_B831*845* ---CaM_Ca_n-CaNAB--> A845*_B831*                | 0.037256 #^-1.s^-1   | 8 s^-1    | 2 s^-1     | 4.9706 uM | 2 s^-1     | 4      |
| A835*845*_B835*845* ---CaM_Ca_n-CaNAB--> A831*845*_B831*        | 0.037256 #^-1.s^-1   | 8 s^-1    | 2 s^-1     | 4.9706 uM | 2 s^-1     | 4      |
| A845*_B845* ---CaM_Ca_n-CaNAB--> A_B845*                        | 0.037256 #^-1.s^-1   | 8 s^-1    | 2 s^-1     | 4.9706 uM | 2 s^-1     | 4      |
| A845*_B845* ---CaM_Ca_n-CaNAB--> A845*_B                        | 0.037256 #^-1.s^-1   | 8 s^-1    | 2 s^-1     | 4.9706 uM | 2 s^-1     | 4      |
| A_B845* ---CaM_Ca_n-CaNAB--> A_B                                | 0.037256 #^-1.s^-1   | 8 s^-1    | 2 s^-1     | 4.9706 uM | 2 s^-1     | 4      |
| A845*_B ---CaM_Ca_n-CaNAB--> A_B                                | 0.037256 #^-1.s^-1   | 8 s^-1    | 2 s^-1     | 4.9706 uM | 2 s^-1     | 4      |
| A831*845*_B845* ---CaM_Ca_n-CaNAB--> A831*_B845*                | 0.037256 #^-1.s^-1   | 8 s^-1    | 2 s^-1     | 4.9706 uM | 2 s^-1     | 4      |
| A831*845*_B845* ---CaM_Ca_n-CaNAB--> A831*845*_B                | 0.037256 #^-1.s^-1   | 8 s^-1    | 2 s^-1     | 4.9706 uM | 2 s^-1     | 4      |
| A831*_B845* ---CaM_Ca_n-CaNAB--> A831*_B                        | 0.037256 #^-1.s^-1   | 8 s^-1    | 2 s^-1     | 4.9706 uM | 2 s^-1     | 4      |
| A831*845*_B ---CaM_Ca_n-CaNAB--> A831*_B                        | 0.037256 #^-1.s^-1   | 8 s^-1    | 2 s^-1     | 4.9706 uM | 2 s^-1     | 4      |
| A845*_B831*845* ---CaM_Ca_n-CaNAB--> A_B831*845*                | 0.037256 #^-1.s^-1   | 8 s^-1    | 2 s^-1     | 4.9706 uM | 2 s^-1     | 4      |
| A845*_B831*845* ---CaM_Ca_n-CaNAB--> A845*_B831*                | 0.037256 #^-1.s^-1   | 8 s^-1    | 2 s^-1     | 4.9706 uM | 2 s^-1     | 4      |
| A_B831*845* ---CaM_Ca_n-CaNAB--> A_B831*                        | 0.037256 #^-1.s^-1   | 8 s^-1    | 2 s^-1     | 4.9706 uM | 2 s^-1     | 4      |
| A845*_B831* ---CaM_Ca_n-CaNAB--> A_B831*                        | 0.037256 #^-1.s^-1   | 8 s^-1    | 2 s^-1     | 4.9706 uM | 2 s^-1     | 4      |
| A835*845*_B835*845* ---CaM_Ca_n-CaNAB--> A831*_B831*845*        | 0.037256 #^-1.s^-1   | 8 s^-1    | 2 s^-1     | 4.9706 uM | 2 s^-1     | 4      |
| A835*845*_B835*845* ---CaM_Ca_n-CaNAB--> A831*845*_B831*        | 0.037256 #^-1.s^-1   | 8 s^-1    | 2 s^-1     | 4.9706 uM | 2 s^-1     | 4      |
| A831*845*_B831* ---CaM_Ca_n-CaNAB--> A831*_B831*                | 0.037256 #^-1.s^-1   | 8 s^-1    | 2 s^-1     | 4.9706 uM | 2 s^-1     | 4      |
| A831*_B831*845* ---CaM_Ca_n-CaNAB--> A831*_B831*                | 0.037256 #^-1.s^-1   | 8 s^-1    | 2 s^-1     | 4.9706 uM | 2 s^-1     | 4      |
| neurogranin*_PSD ---CaM_Ca_n-CaNAB--> neurogranin*_PSD          | 0.0061778 #^-1.s^-1  | 2.67 s^-1 | 0.67 s^-1  | 10.012 uM | 0.67 s^-1  | 3.9851 |
| CaMKII-thr286-PSD ---tot-CaM-CaMKII-PSD--> CaMKII***-PSD        | 0.015625 #^-1.s^-1   | 24 s^-1   | 6 s^-1     | 320 uM    | 6 s^-1     | 4      |
| CaMKII-CaM-PSD ---tot-CaM-CaMKII-PSD--> CaMKII-thr286-CaM-PSD   | 0.0013021 #^-1.s^-1  | 2 s^-1    | 0.5 s^-1   | 320 uM    | 0.5 s^-1   | 4      |
| CaMKII-PSD ---tot-CaM-CaMKII-PSD--> CaMKII-thr286-PSD           | 0.0052083 #^-1.s^-1  | 8 s^-1    | 2 s^-1     | 320 uM    | 2 s^-1     | 4      |
| CaMKII-thr286 ---tot_CaM_CaMKII--> CaMKII***                    | 0.0024474 #^-1.s^-1  | 24 s^-1   | 6 s^-1     | 227 uM    | 6 s^-1     | 4      |
| CaMKII-CaM ---tot_CaM_CaMKII--> CaMKII-thr286-CaM               | 0.00020395 #^-1.s^-1 | 2 s^-1    | 0.5 s^-1   | 227 uM    | 0.5 s^-1   | 4      |
| CaMKII-thr286 ---tot_autonomous_CaMKII--> CaMKII***             | 0.0015873 #^-1.s^-1  | 24 s^-1   | 6 s^-1     | 350 uM    | 6 s^-1     | 4      |
| CaMKII-CaM ---tot_autonomous_CaMKII--> CaMKII-thr286-CaM        | 0.00013228 #^-1.s^-1 | 2 s^-1    | 0.5 s^-1   | 349.99 uM | 0.5 s^-1   | 4      |
| ATP ---AC1-CaM--> cAMP                                          | 0.0013889 #^-1.s^-1  | 18 s^-1   | 4.5 s^-1   | 300 uM    | 4.5 s^-1   | 4      |
| ATP ---AC2*--> cAMP                                             | 0.00061728 #^-1.s^-1 | 8 s^-1    | 2 s^-1     | 300 uM    | 2 s^-1     | 4      |
| cAMP ---cAMP-PDE--> AMP                                         | 0.046667 #^-1.s^-1   | 40 s^-1   | 10 s^-1    | 19.841 uM | 10 s^-1    | 4      |
| cAMP ---cAMP-PDE*--> AMP                                        | 0.093333 #^-1.s^-1   | 80 s^-1   | 20 s^-1    | 19.841 uM | 20 s^-1    | 4      |
| cAMP ---PDE1--> AMP                                             | 0.0038889 #^-1.s^-1  | 6.67 s^-1 | 1.667 s^-1 | 39.7 uM   | 1.667 s^-1 | 4.0012 |
| cAMP ---CaM.PDE1--> AMP                                         | 0.023333 #^-1.s^-1   | 40 s^-1   | 10 s^-1    | 39.683 uM | 10 s^-1    | 4      |

| Pools for group ###[]    | InitialConc  | buffered | Volume  |
|--------------------------|--------------|----------|---------|
| name                     |              |          |         |
| CaM-Ca4                  | 0 uM         | 0        | 0.09 fl |
| PP1-active               | 1.8 uM       | 0        | 0.09 fl |
| cAMP                     | 0 uM         | 0        | 0.09 fl |
| Ca                       | 0.08 uM      | 0        | 0.09 fl |
| PKA-active               | 0 uM         | 0        | 0.09 fl |
| CaM-Ca3                  | 0 uM         | 0        | 0.09 fl |
| CaM-TR2-Ca2              | 0 uM         | 0        | 0.09 fl |
| PP2A                     | 0.11111 uM   | 0        | 0.09 fl |
| CaNAB-Ca4                | 0 uM         | 0        | 0.09 fl |
| CaMKII-thr286-CaM-PSD    | 0 uM         | 0        | 0.01 fl |
| CaMKII-CaM-PSD           | 0 uM         | 0        | 0.01 fl |
| CaMKII-thr286-PSD        | 0 uM         | 0        | 0.01 fl |
| CaMKII-PSD               | 0 uM         | 0        | 0.01 fl |
| CaMKII***-PSD            | 0 uM         | 0        | 0.01 fl |
| tot-auto-PSD             | 2 uM         | 0        | 0.01 fl |
| CaM-TR2-Ca2-PSD          | 0 uM         | 0        | 0.01 fl |
| CaM-Ca3-PSD              | 0.0025458 uM | 0        | 0.01 fl |
| CaM-Ca4-PSD              | 0 uM         | 0        | 0.01 fl |
| Ca-PSD                   | 0.08 uM      | 0        | 0.01 fl |
| 286P-PSD                 | 0 uM         | 0        | 0.01 fl |
| actCaMKII-PSD            | 2 uM         | 0        | 0.01 fl |
| tot_CaMKII_PSD           | 2 uM         | 0        | 0.01 fl |
| tot_CaMKII_cyt           | 22 uM        | 0        | 0.09 fl |
| PP1-active_PSD           | 8 uM         | 0        | 0.01 fl |
| PKC-active               | 0.1 uM       | 0        | 0.09 fl |
| temp-PIP2                | 2.5 uM       | 1        | 0.09 fl |
| I_845-P                  | 0 uM         | 0        | 0.09 fl |
| tot_I_GluR12             | 0 uM         | 0        | 0.09 fl |
| total_Int                | 0.096296 uM  | 0        | 0.09 fl |
| Ser845                   | 0 uM         | 0        | 0.01 fl |
| Ser845-P                 | 0 uM         | 0        | 0.01 fl |
| Ser845-PP                | 0 uM         | 0        | 0.01 fl |
| Ser831                   | 0 uM         | 0        | 0.01 fl |
| Ser831-P                 | 0 uM         | 0        | 0.01 fl |
| Ser831-PP                | 0 uM         | 0        | 0.01 fl |
| tot_mem_GluR12           | 0 uM         | 0        | 0.01 fl |
| act_CaMKII_cyt           | 2 uM         | 0        | 0.09 fl |
| NMDAR                    | 120 uM       | 0        | 0.01 fl |
| CaM_Ca_n-CaNAB           | 0 uM         | 0        | 0.09 fl |
| basal_CaMKII_cyt         | 2 uM         | 1        | 0.09 fl |
| basal_CaMKII_PSD         | 2 uM         | 0        | 0.01 fl |
| PKC-control              | 0.1 uM       | 1        | 0.09 fl |
| Ca_control_cyt           | 0.08 uM      | 1        | 0.09 fl |
| Ca_control_PSD           | 0.08 uM      | 1        | 0.01 fl |
| basal_CaMKII_PSD_control | 2 uM         | 1        | 0.01 fl |
| Anchor                   | 27.333 uM    | 0        | 0.01 fl |
| I_845                    | 0 uM         | 0        | 0.09 fl |
| I_845_PP                 | 0 uM         | 0        | 0.09 fl |
| tot-CaM-CaMKII-PSD       | 0 uM         | 0        | 0.01 fl |
| CaMKII-thr305-PSD        | 0 uM         | 0        | 0.01 fl |
| AMPA_bulk                | 0.0092593 uM | 1        | 5 fl    |
| CaMKII                   | 20 uM        | 0        | 0.09 fl |
| CaMKII-CaM               | 0 uM         | 0        | 0.09 fl |
| CaMKII-thr286*-CaM       | 0 uM         | 0        | 0.09 fl |
| CaMKII***                | 0 uM         | 0        | 0.09 fl |
| CaMKII-thr286            | 0 uM         | 0        | 0.09 fl |
| tot_CaM_CaMKII           | 0 uM         | 0        | 0.09 fl |
| tot_autonomous_CaMKII    | 2 uM         | 0        | 0.09 fl |
| CaMK-thr305              | 0 uM         | 0        | 0.09 fl |
| CaM                      | 26.333 uM    | 0        | 0.09 fl |
| neurogranin-CaM          | 0 uM         | 0        | 0.09 fl |
| neurogranin*             | 0 uM         | 0        | 0.09 fl |
| neurogranin              | 10 uM        | 0        | 0.09 fl |
| CaM-PSD                  | 26.333 uM    | 0        | 0.01 fl |
| neurogranin-CaM_PSD      | 0 uM         | 0        | 0.01 fl |
| neurogranin_PSD          | 10 uM        | 0        | 0.01 fl |
| neurogranin*_PSD         | 0 uM         | 0        | 0.01 fl |
| I1                       | 1.8 uM       | 0        | 0.09 fl |
| I1*                      | 0 uM         | 0        | 0.09 fl |
| PP1-I1*                  | 0 uM         | 0        | 0.09 fl |
| PP1-I1                   | 0 uM         | 0        | 0.09 fl |
| CaNAB                    | 1 uM         | 0        | 0.09 fl |
| CaNAB-Ca2                | 0 uM         | 0        | 0.09 fl |
| R2C2                     | 0.5 uM       | 0        | 0.09 fl |
| R2C2-cAMP                | 0 uM         | 0        | 0.09 fl |
| R2C2-cAMP2               | 0 uM         | 0        | 0.09 fl |
| R2C2-cAMP3               | 0 uM         | 0        | 0.09 fl |
| R2C2-cAMP4               | 0 uM         | 0        | 0.09 fl |
| R2C-cAMP4                | 0 uM         | 0        | 0.09 fl |
| R2-cAMP4                 | 0 uM         | 0        | 0.09 fl |
| PKA-inhibitor            | 0.25926 uM   | 0        | 0.09 fl |
| inhibited-PKA            | 0 uM         | 0        | 0.09 fl |
| ATP                      | 2000 uM      | 1        | 0.09 fl |
| AC1-CaM                  | 0 uM         | 0        | 0.09 fl |
| AC1                      | 0.074074 uM  | 0        | 0.09 fl |
| AC2*                     | 0 uM         | 0        | 0.09 fl |
| AC2                      | 0.074074 uM  | 0        | 0.09 fl |
| AMP                      | 0 uM         | 0        | 0.09 fl |
| cAMP-PDE                 | 0.55556 uM   | 0        | 0.09 fl |
| cAMP-PDE*                | 0 uM         | 0        | 0.09 fl |

|                     |             |   |         |
|---------------------|-------------|---|---------|
| PDE1                | 2.5926 uM   | 0 | 0.09 fi |
| CaM.PDE1            | 0 uM        | 0 | 0.09 fi |
| cAMP_in_dend        | 0 uM        | 0 | 5 fi    |
| I1 (in PSD)         | 8 uM        | 0 | 0.01 fi |
| I1* (in PSD)        | 0 uM        | 0 | 0.01 fi |
| PP1-I1* (in PSD)    | 0 uM        | 0 | 0.01 fi |
| PP1-I1 (in PSD)     | 0 uM        | 0 | 0.01 fi |
| GluR23_M            | 3.5 uM      | 0 | 0.01 fi |
| GluR23_I            | 0.092593 uM | 0 | 0.09 fi |
| total_mem           | 3.4667 uM   | 0 | 0.01 fi |
| AMPAAR_deg          | 0 uM        | 1 | 0.09 fi |
| A_B                 | 0 uM        | 0 | 0.09 fi |
| A831*_B             | 0 uM        | 0 | 0.09 fi |
| A845*_B             | 0 uM        | 0 | 0.09 fi |
| A831*845*_B         | 0 uM        | 0 | 0.09 fi |
| A_B845*             | 0 uM        | 0 | 0.09 fi |
| AA831*_B845*        | 0 uM        | 0 | 0.09 fi |
| A845*_B845*         | 0 uM        | 0 | 0.09 fi |
| A831*845*_B845*     | 0 uM        | 0 | 0.09 fi |
| A845*_B831*845*     | 0 uM        | 0 | 0.09 fi |
| A835*845*_B835*845* | 0 uM        | 0 | 0.09 fi |
| A_B831*845*         | 0 uM        | 0 | 0.09 fi |
| A831*_B831*845*     | 0 uM        | 0 | 0.09 fi |
| A_B831*             | 0 uM        | 0 | 0.09 fi |
| A845*_B831*         | 0 uM        | 0 | 0.01 fi |
| A831*_B831*         | 0 uM        | 0 | 0.09 fi |
| A831*845*_B831*     | 0 uM        | 0 | 0.09 fi |
| A_B                 | 0 uM        | 0 | 0.01 fi |
| A831*_B             | 0 uM        | 0 | 0.01 fi |
| A_B831*             | 0 uM        | 0 | 0.01 fi |
| A831*_B831*         | 0 uM        | 0 | 0.01 fi |
| A845*_B             | 0 uM        | 0 | 0.01 fi |
| A831*845*_B         | 0 uM        | 0 | 0.01 fi |
| A831*845*_B831*     | 0 uM        | 0 | 0.01 fi |
| A_B845*             | 0 uM        | 0 | 0.01 fi |
| A845*_B831*         | 0 uM        | 0 | 0.01 fi |
| A845*_B845*         | 0 uM        | 0 | 0.01 fi |
| A831*_B845*         | 0 uM        | 0 | 0.01 fi |
| A_B831*845*         | 0 uM        | 0 | 0.01 fi |
| A831*_B831*845*     | 0 uM        | 0 | 0.01 fi |
| A831*845*_B845*     | 0 uM        | 0 | 0.01 fi |
| A845*_B831*845*     | 0 uM        | 0 | 0.01 fi |
| A835*845*_B835*845* | 0 uM        | 0 | 0.01 fi |

Model Parameters for nested bistability model: Model 5

Concentration units: uM (micromolar) for rate constants presented as Kf, Kb, Km

#/cell for rate constants presented as Kf, kb, k1, k2, k3. This formulation of rates may depend on cellular volume.

A few reactions represent traffic between compartments of different volumes. Where such reactions involve concentration units, please use the #/cell rate terms as they are unambiguous.

Time units: Seconds in all cases.

Total Volume of Synapse = 0.1 femtoliters (fl)

Volume of cytosolic portion = 0.09 fl

Volume of Postsynaptic Density (PSD) = 0.01 fl

The enzyme rates are related as follows:

$Km = (k2 + k3)/k1$  (after conversion of units)

$Kcat = k3$

Ratio =  $k2/k3$

Initial concentrations (Colnit) are mostly zero, except for a few key molecules.

There is a flag for 'buffered' in the molecule concentration table. When this flag is zero the molecule concentrations are computed according to the reaction equations. If the flag is one the molecule concentration is held fixed to its initial concentration.

The entire model scheme is presented as composite tables for molecules, reactions and enzymes.

All equations.

Reactions

| Reaction                                                     | kf                  | kb                | Kf                 | Kb               |
|--------------------------------------------------------------|---------------------|-------------------|--------------------|------------------|
| CaMKII-PSD + CaM-Ca4-PSD <====> CaMKII-CaM-PSD               | 8.3333 #^-1.s^-1    | 0 s^-1            | 50 uM^-1.s^-1      | 0 s^-1           |
| CaMKII-CaM + NMDAR <====> CaMKII-CaM-PSD                     | 2e-05 #^-1.s^-1     | 0 s^-1            | 0.00108 uM^-1.s^-1 | 0 s^-1           |
| CaMKII-thr286*-CaM + NMDAR <====> CaMKII-thr286-CaM-PSD      | 2e-05 #^-1.s^-1     | 0 s^-1            | 0.00108 uM^-1.s^-1 | 0 s^-1           |
| CaMKII-PSD <====> CaMKII + NMDAR                             | 0.3 s^-1            | 1e-05 #^-1.s^-1   | 0.3 s^-1           | 6e-05 uM^-1.s^-1 |
| CaMKII-thr305-PSD <====> CaMKII-thr305 + NMDAR               | 0.3 s^-1            | 1e-05 #^-1.s^-1   | 0.3 s^-1           | 6e-05 uM^-1.s^-1 |
| CaMKII-thr286-PSD + CaM-Ca4-PSD <====> CaMKII-thr286-CaM-PSD | 166.67 #^-1.s^-1    | 0.1 s^-1          | 1000 uM^-1.s^-1    | 0.1 s^-1         |
| CaM-Ca4-PSD <====> CaM-Ca4                                   | 540 s^-1            | 60 s^-1           | 540 s^-1           | 60 s^-1          |
| I1* + PP1-active_PSD <====> PP1-I1*                          | 83.33 #^-1.s^-1     | 0.1 s^-1          | 499.98 uM^-1.s^-1  | 0.1 s^-1         |
| CaM-Ca3 + Ca <====> CaM-Ca4                                  | 0.0086111 #^-1.s^-1 | 10 s^-1           | 0.465 uM^-1.s^-1   | 10 s^-1          |
| GluR23_M <====> GluR23_I                                     | 0.00035 s^-1        | 0.0014 s^-1       | 0.00035 s^-1       | 0.0014 s^-1      |
| CaMKII-CaM-PSD <====> CaM-Ca4-PSD + CaMKII-PSD               | 5 s^-1              | 0 #^-1.s^-1       | 5 s^-1             | 0 uM^-1.s^-1     |
| PKC-control <====> PKC-active                                | 2.5 s^-1            | 2.5 s^-1          | 2.5 s^-1           | 2.5 s^-1         |
| Ca_control_cyt <====> Ca                                     | 100 s^-1            | 100 s^-1          | 100 s^-1           | 100 s^-1         |
| Ca_control_PSD <====> Ca-PSD                                 | 100 s^-1            | 100 s^-1          | 100 s^-1           | 100 s^-1         |
| basal_CaMKII_PSD_control <====> basal_CaMKII_PSD             | 1 s^-1              | 1 s^-1            | 1 s^-1             | 1 s^-1           |
| AMPA_R_bulk <====> A_B                                       | 0.018 s^-1          | 1 s^-1            | 0.018 s^-1         | 1 s^-1           |
| CaM-Ca4 + CaMKII <====> CaMKII-CaM                           | 0.92592 #^-1.s^-1   | 5 s^-1            | 50 uM^-1.s^-1      | 5 s^-1           |
| CaMKII-thr286 + CaM-Ca4 <====> CaMKII-thr286*-CaM            | 18.522 #^-1.s^-1    | 0.1 s^-1          | 1000.2 uM^-1.s^-1  | 0.1 s^-1         |
| CaM + 2 Ca <====> CaM-TR2-Ca2                                | 0.024691 #^-2.s^-1  | 72 s^-1           | 71.999 uM^-2.s^-1  | 72 s^-1          |
| CaM-TR2-Ca2 + Ca <====> CaM-Ca3                              | 0.066667 #^-1.s^-1  | 10 s^-1           | 3.6 uM^-1.s^-1     | 10 s^-1          |
| neurogranin + CaM <====> neurogranin-CaM                     | 0.0055556 #^-1.s^-1 | 1 s^-1            | 0.3 uM^-1.s^-1     | 1 s^-1           |
| neurogranin* <====> neurogranin                              | 0.005 s^-1          | 0 s^-1            | 0.005 s^-1         | 0 s^-1           |
| CaM-PSD + 2 Ca-PSD <====> CaM-TR2-Ca2-PSD                    | 2 #^-2.s^-1         | 72 s^-1           | 72 uM^-2.s^-1      | 72 s^-1          |
| CaM-TR2-Ca2-PSD + Ca-PSD <====> CaM-Ca3-PSD                  | 0.6 #^-1.s^-1       | 10 s^-1           | 3.6 uM^-1.s^-1     | 10 s^-1          |
| CaM-Ca3-PSD + Ca-PSD <====> CaM-Ca4-PSD                      | 0.077502 #^-1.s^-1  | 10 s^-1           | 0.46501 uM^-1.s^-1 | 10 s^-1          |
| neurogranin_PSD + CaM-PSD <====> neurogranin-CaM_PSD         | 0.05 #^-1.s^-1      | 1 s^-1            | 0.3 uM^-1.s^-1     | 1 s^-1           |
| neurogranin*_PSD <====> neurogranin_PSD                      | 0.005 s^-1          | 0 s^-1            | 0.005 s^-1         | 0 s^-1           |
| I1* + PP1-active <====> PP1-I1*                              | 9.2589 #^-1.s^-1    | 0.1 s^-1          | 499.98 uM^-1.s^-1  | 0.1 s^-1         |
| PP1-I1 <====> PP1-active + I1                                | 1 s^-1              | 0 #^-1.s^-1       | 1 s^-1             | 0 uM^-1.s^-1     |
| 2 Ca + CaNAB-Ca2 <====> CaNAB-Ca4                            | 0.0012346 #^-2.s^-1 | 1 s^-1            | 3.6001 uM^-2.s^-1  | 1 s^-1           |
| CaNAB + 2 Ca <====> CaNAB-Ca2                                | 3.4321 #^-2.s^-1    | 1 s^-1            | 10008 uM^-2.s^-1   | 1 s^-1           |
| CaM-Ca4 + CaNAB-Ca4 <====> CaM_Ca_n-CaNAB                    | 11.111 #^-1.s^-1    | 1 s^-1            | 599.99 uM^-1.s^-1  | 1 s^-1           |
| R2C2 + cAMP <====> R2C2-cAMP                                 | 1 #^-1.s^-1         | 33 s^-1           | 54 uM^-1.s^-1      | 33 s^-1          |
| R2C2-cAMP + cAMP <====> R2C2-cAMP2                           | 1 #^-1.s^-1         | 33 s^-1           | 54 uM^-1.s^-1      | 33 s^-1          |
| R2C2-cAMP2 + cAMP <====> R2C2-cAMP3                          | 1.3889 #^-1.s^-1    | 110 s^-1          | 75.001 uM^-1.s^-1  | 110 s^-1         |
| cAMP + R2C2-cAMP3 <====> R2C2-cAMP4                          | 1.3889 #^-1.s^-1    | 32.5 s^-1         | 75.001 uM^-1.s^-1  | 32.5 s^-1        |
| R2C2-cAMP4 <====> PKA-active + R2C-cAMP4                     | 60 s^-1             | 0.33333 #^-1.s^-1 | 60 s^-1            | 18 uM^-1.s^-1    |
| R2C-cAMP4 <====> PKA-active + R2-cAMP4                       | 60 s^-1             | 0.33333 #^-1.s^-1 | 60 s^-1            | 18 uM^-1.s^-1    |
| PKA-active + PKA-inhibitor <====> inhibited-PKA              | 1.1111 #^-1.s^-1    | 1 s^-1            | 59.999 uM^-1.s^-1  | 1 s^-1           |
| CaM-Ca4 + AC1 <====> AC1-CaM                                 | 0.92592 #^-1.s^-1   | 1 s^-1            | 50 uM^-1.s^-1      | 1 s^-1           |
| AC2* <====> AC2                                              | 0.1 s^-1            | 0 s^-1            | 0.1 s^-1           | 0 s^-1           |
| cAMP-PDE* <====> cAMP-PDE                                    | 0.01 s^-1           | 0 s^-1            | 0.01 s^-1          | 0 s^-1           |
| PDE1 + CaM-Ca4 <====> CaM.PDE1                               | 13.333 #^-1.s^-1    | 5 s^-1            | 719.98 uM^-1.s^-1  | 5 s^-1           |
| cAMP <====> cAMP_in_dend                                     | 300 s^-1            | 5.4 s^-1          | 300 s^-1           | 5.4 s^-1         |
| PP1-I1 <====> I1 + PP1-active_PSD                            | 1 s^-1              | 0 #^-1.s^-1       | 1 s^-1             | 0 uM^-1.s^-1     |
| A831*_B831* <====> A831*_B831* + Anchor                      | 0.0008 s^-1         | 0 #^-1.s^-1       | 0.0008 s^-1        | 0 uM^-1.s^-1     |
| A_B831* <====> A_B831* + Anchor                              | 0.0008 s^-1         | 0 #^-1.s^-1       | 0.0008 s^-1        | 0 uM^-1.s^-1     |
| A831*_B <====> A831*_B + Anchor                              | 0.0008 s^-1         | 0 #^-1.s^-1       | 0.0008 s^-1        | 0 uM^-1.s^-1     |
| A_B <====> A_B + Anchor                                      | 0.0008 s^-1         | 0 #^-1.s^-1       | 0.0008 s^-1        | 0 uM^-1.s^-1     |
| A835*845*_B835*845* <====> AMPAR_deg                         | 3.6e-05 s^-1        | 0 s^-1            | 3.6e-05 s^-1       | 0 s^-1           |
| A845*_B831*845* <====> AMPAR_deg                             | 3.6e-05 s^-1        | 0 s^-1            | 3.6e-05 s^-1       | 0 s^-1           |
| A831*845*_B845* <====> AMPAR_deg                             | 3.6e-05 s^-1        | 0 s^-1            | 3.6e-05 s^-1       | 0 s^-1           |
| A845*_B845* <====> AMPAR_deg                                 | 3.6e-05 s^-1        | 0 s^-1            | 3.6e-05 s^-1       | 0 s^-1           |
| A835*845*_B835*845* + Anchor <====> A835*845*_B835*845*      | 0.0002 #^-1.s^-1    | 0.008 s^-1        | 0.0108 uM^-1.s^-1  | 0.008 s^-1       |
| A845*_B831*845* + Anchor <====> A845*_B831*845*              | 0.0002 #^-1.s^-1    | 0.008 s^-1        | 0.0108 uM^-1.s^-1  | 0.008 s^-1       |
| A831*845*_B845* + Anchor <====> A831*845*_B845*              | 0.0002 #^-1.s^-1    | 0.008 s^-1        | 0.0108 uM^-1.s^-1  | 0.008 s^-1       |
| A845*_B845* + Anchor <====> A845*_B845*                      | 0.0002 #^-1.s^-1    | 0.008 s^-1        | 0.0108 uM^-1.s^-1  | 0.008 s^-1       |





|                                                                  |                      |           |            |           |            |        |
|------------------------------------------------------------------|----------------------|-----------|------------|-----------|------------|--------|
| A831*_B831*845* ---PP1-active_PSD--> A_B831*845*                 | 0.14583 #^-1.s^-1    | 1.4 s^-1  | 0.35 s^-1  | 2 uM      | 0.35 s^-1  | 4      |
| A831*845*_B831* ---PP1-active_PSD--> A845*_B831*                 | 0.14583 #^-1.s^-1    | 1.4 s^-1  | 0.35 s^-1  | 2 uM      | 0.35 s^-1  | 4      |
| A831*_B831* ---PP1-active_PSD--> A_B831*                         | 0.14583 #^-1.s^-1    | 1.4 s^-1  | 0.35 s^-1  | 2 uM      | 0.35 s^-1  | 4      |
| A835*845*_B835*845* ---PP1-active_PSD--> A831*845*_B845*         | 0.14583 #^-1.s^-1    | 1.4 s^-1  | 0.35 s^-1  | 2 uM      | 0.35 s^-1  | 4      |
| A831*_B831*845* ---PP1-active_PSD--> A831*_B845*                 | 0.14583 #^-1.s^-1    | 1.4 s^-1  | 0.35 s^-1  | 2 uM      | 0.35 s^-1  | 4      |
| A831*845*_B831* ---PP1-active_PSD--> A831*845*_B                 | 0.14583 #^-1.s^-1    | 1.4 s^-1  | 0.35 s^-1  | 2 uM      | 0.35 s^-1  | 4      |
| A831*_B831* ---PP1-active_PSD--> A831*_B                         | 0.14583 #^-1.s^-1    | 1.4 s^-1  | 0.35 s^-1  | 2 uM      | 0.35 s^-1  | 4      |
| neurogranin ---PKC-active--> neurogranin*                        | 0.0018889 #^-1.s^-1  | 2.34 s^-1 | 0.58 s^-1  | 28.627 uM | 0.58 s^-1  | 4.0345 |
| neurogranin-CaM ---PKC-active--> CaM + neurogranin*              | 0.0011333 #^-1.s^-1  | 1.4 s^-1  | 0.35 s^-1  | 28.596 uM | 0.35 s^-1  | 4      |
| AC2 ---PKC-active--> AC2*                                        | 0.0111111 #^-1.s^-1  | 16 s^-1   | 4 s^-1     | 33.334 uM | 4 s^-1     | 4      |
| neurogranin_PSD ---PKC-active--> neurogranin*_PSD                | 0.0018889 #^-1.s^-1  | 2.34 s^-1 | 0.58 s^-1  | 28.627 uM | 0.58 s^-1  | 4.0345 |
| neurogranin-CaM_PSD ---PKC-active--> CaM-PSD + neurogranin*_PSD  | 0.0011333 #^-1.s^-1  | 1.4 s^-1  | 0.35 s^-1  | 28.596 uM | 0.35 s^-1  | 4      |
| neurogranin* ---CaM_Ca_n-CaNAB--> neurogranin                    | 0.0061778 #^-1.s^-1  | 2.67 s^-1 | 0.67 s^-1  | 10.012 uM | 0.67 s^-1  | 3.9851 |
| I1* ---CaM_Ca_n-CaNAB--> I1                                      | 0.0063333 #^-1.s^-1  | 1.36 s^-1 | 0.34 s^-1  | 4.9708 uM | 0.34 s^-1  | 4      |
| PP1-I1* ---CaM_Ca_n-CaNAB--> PP1-I1                              | 0.0063333 #^-1.s^-1  | 1.36 s^-1 | 0.34 s^-1  | 4.9708 uM | 0.34 s^-1  | 4      |
| I1* ---CaM_Ca_n-CaNAB--> I1                                      | 0.0063333 #^-1.s^-1  | 1.36 s^-1 | 0.34 s^-1  | 4.9707 uM | 0.34 s^-1  | 4      |
| PP1-I1* ---CaM_Ca_n-CaNAB--> PP1-I1                              | 0.0063333 #^-1.s^-1  | 1.36 s^-1 | 0.34 s^-1  | 4.9707 uM | 0.34 s^-1  | 4      |
| A845*_B ---CaM_Ca_n-CaNAB--> A_B                                 | 0.037256 #^-1.s^-1   | 8 s^-1    | 2 s^-1     | 4.9706 uM | 2 s^-1     | 4      |
| A831*845*_B ---CaM_Ca_n-CaNAB--> A831*_B                         | 0.037256 #^-1.s^-1   | 8 s^-1    | 2 s^-1     | 4.9706 uM | 2 s^-1     | 4      |
| A845*_B831* ---CaM_Ca_n-CaNAB--> A_B831*                         | 0.037256 #^-1.s^-1   | 8 s^-1    | 2 s^-1     | 4.9706 uM | 2 s^-1     | 4      |
| A831*845*_B831* ---CaM_Ca_n-CaNAB--> A831*_B831*                 | 0.037256 #^-1.s^-1   | 8 s^-1    | 2 s^-1     | 4.9706 uM | 2 s^-1     | 4      |
| A_B845* ---CaM_Ca_n-CaNAB--> A_B                                 | 0.037256 #^-1.s^-1   | 8 s^-1    | 2 s^-1     | 4.9706 uM | 2 s^-1     | 4      |
| AA831*_B845* ---CaM_Ca_n-CaNAB--> A831*_B                        | 0.037256 #^-1.s^-1   | 8 s^-1    | 2 s^-1     | 4.9706 uM | 2 s^-1     | 4      |
| A_B831*845* ---CaM_Ca_n-CaNAB--> A_B831*                         | 0.037256 #^-1.s^-1   | 8 s^-1    | 2 s^-1     | 4.9706 uM | 2 s^-1     | 4      |
| A831*_B831*845* ---CaM_Ca_n-CaNAB--> A831*_B831*                 | 0.037256 #^-1.s^-1   | 8 s^-1    | 2 s^-1     | 4.9706 uM | 2 s^-1     | 4      |
| A845*_B845* ---CaM_Ca_n-CaNAB--> A_B845*                         | 0.037256 #^-1.s^-1   | 8 s^-1    | 2 s^-1     | 4.9706 uM | 2 s^-1     | 4      |
| A831*845*_B845* ---CaM_Ca_n-CaNAB--> AA831*_B845*                | 0.037256 #^-1.s^-1   | 8 s^-1    | 2 s^-1     | 4.9706 uM | 2 s^-1     | 4      |
| A845*_B831*845* ---CaM_Ca_n-CaNAB--> A_B831*845*                 | 0.037256 #^-1.s^-1   | 8 s^-1    | 2 s^-1     | 4.9706 uM | 2 s^-1     | 4      |
| A835*845*_B835*845* ---CaM_Ca_n-CaNAB--> A831*_B831*845*         | 0.037256 #^-1.s^-1   | 8 s^-1    | 2 s^-1     | 4.9706 uM | 2 s^-1     | 4      |
| A845*_B845* ---CaM_Ca_n-CaNAB--> A845*_B                         | 0.037256 #^-1.s^-1   | 8 s^-1    | 2 s^-1     | 4.9706 uM | 2 s^-1     | 4      |
| A831*845*_B845* ---CaM_Ca_n-CaNAB--> A831*845*_B                 | 0.037256 #^-1.s^-1   | 8 s^-1    | 2 s^-1     | 4.9706 uM | 2 s^-1     | 4      |
| A845*_B831*845* ---CaM_Ca_n-CaNAB--> A845*_B831*                 | 0.037256 #^-1.s^-1   | 8 s^-1    | 2 s^-1     | 4.9706 uM | 2 s^-1     | 4      |
| A835*845*_B835*845* ---CaM_Ca_n-CaNAB--> A831*845*_B831*         | 0.037256 #^-1.s^-1   | 8 s^-1    | 2 s^-1     | 4.9706 uM | 2 s^-1     | 4      |
| A845*_B845* ---CaM_Ca_n-CaNAB--> A_B845*                         | 0.037256 #^-1.s^-1   | 8 s^-1    | 2 s^-1     | 4.9706 uM | 2 s^-1     | 4      |
| A845*_B845* ---CaM_Ca_n-CaNAB--> A845*_B                         | 0.037256 #^-1.s^-1   | 8 s^-1    | 2 s^-1     | 4.9706 uM | 2 s^-1     | 4      |
| A_B845* ---CaM_Ca_n-CaNAB--> A_B                                 | 0.037256 #^-1.s^-1   | 8 s^-1    | 2 s^-1     | 4.9706 uM | 2 s^-1     | 4      |
| A845*_B ---CaM_Ca_n-CaNAB--> A_B                                 | 0.037256 #^-1.s^-1   | 8 s^-1    | 2 s^-1     | 4.9706 uM | 2 s^-1     | 4      |
| A831*845*_B845* ---CaM_Ca_n-CaNAB--> A831*_B845*                 | 0.037256 #^-1.s^-1   | 8 s^-1    | 2 s^-1     | 4.9706 uM | 2 s^-1     | 4      |
| A831*845*_B845* ---CaM_Ca_n-CaNAB--> A831*845*_B                 | 0.037256 #^-1.s^-1   | 8 s^-1    | 2 s^-1     | 4.9706 uM | 2 s^-1     | 4      |
| A831*_B845* ---CaM_Ca_n-CaNAB--> A831*_B                         | 0.037256 #^-1.s^-1   | 8 s^-1    | 2 s^-1     | 4.9706 uM | 2 s^-1     | 4      |
| A831*845*_B ---CaM_Ca_n-CaNAB--> A831*_B                         | 0.037256 #^-1.s^-1   | 8 s^-1    | 2 s^-1     | 4.9706 uM | 2 s^-1     | 4      |
| A845*_B831*845* ---CaM_Ca_n-CaNAB--> A_B831*845*                 | 0.037256 #^-1.s^-1   | 8 s^-1    | 2 s^-1     | 4.9706 uM | 2 s^-1     | 4      |
| A845*_B831*845* ---CaM_Ca_n-CaNAB--> A845*_B831*                 | 0.037256 #^-1.s^-1   | 8 s^-1    | 2 s^-1     | 4.9706 uM | 2 s^-1     | 4      |
| A_B831*845* ---CaM_Ca_n-CaNAB--> A_B831*                         | 0.037256 #^-1.s^-1   | 8 s^-1    | 2 s^-1     | 4.9706 uM | 2 s^-1     | 4      |
| A845*_B831* ---CaM_Ca_n-CaNAB--> A_B831*                         | 0.037256 #^-1.s^-1   | 8 s^-1    | 2 s^-1     | 4.9706 uM | 2 s^-1     | 4      |
| A835*845*_B835*845* ---CaM_Ca_n-CaNAB--> A831*_B831*845*         | 0.037256 #^-1.s^-1   | 8 s^-1    | 2 s^-1     | 4.9706 uM | 2 s^-1     | 4      |
| A835*845*_B835*845* ---CaM_Ca_n-CaNAB--> A831*845*_B831*         | 0.037256 #^-1.s^-1   | 8 s^-1    | 2 s^-1     | 4.9706 uM | 2 s^-1     | 4      |
| A831*845*_B831* ---CaM_Ca_n-CaNAB--> A831*_B831*                 | 0.037256 #^-1.s^-1   | 8 s^-1    | 2 s^-1     | 4.9706 uM | 2 s^-1     | 4      |
| A831*_B831*845* ---CaM_Ca_n-CaNAB--> A831*_B831*                 | 0.037256 #^-1.s^-1   | 8 s^-1    | 2 s^-1     | 4.9706 uM | 2 s^-1     | 4      |
| neurogranin*_PSD ---CaM_Ca_n-CaNAB--> neurogranin*_PSD           | 0.0061778 #^-1.s^-1  | 2.67 s^-1 | 0.67 s^-1  | 10.012 uM | 0.67 s^-1  | 3.9851 |
| CaMKII-thr286-PSD ---tot-CaM-CaMKII-PSD--> CaMKII***-PSD         | 0.015625 #^-1.s^-1   | 24 s^-1   | 6 s^-1     | 320 uM    | 6 s^-1     | 4      |
| CaMKII-CaM-PSD ---tot-CaM-CaMKII-PSD--> CaMKII-thr286-CaM-PSD    | 0.0013021 #^-1.s^-1  | 2 s^-1    | 0.5 s^-1   | 320 uM    | 0.5 s^-1   | 4      |
| CaMKII-PSD ---tot-CaM-CaMKII-PSD--> CaMKII-thr286-PSD            | 0.0052083 #^-1.s^-1  | 8 s^-1    | 2 s^-1     | 320 uM    | 2 s^-1     | 4      |
| CaMKII-thr286-CaM-PSD ---PP1-active_CaMKII_PSD--> CaMKII-CaM-PSD | 0.083333 #^-1.s^-1   | 0.8 s^-1  | 0.2 s^-1   | 2 uM      | 0.2 s^-1   | 4      |
| CaMKII-thr286-PSD ---PP1-active_CaMKII_PSD--> CaMKII-PSD         | 0.083333 #^-1.s^-1   | 0.8 s^-1  | 0.2 s^-1   | 2 uM      | 0.2 s^-1   | 4      |
| CaMKII***-PSD ---PP1-active_CaMKII_PSD--> CaMKII-thr286-PSD      | 0.083333 #^-1.s^-1   | 0.8 s^-1  | 0.2 s^-1   | 2 uM      | 0.2 s^-1   | 4      |
| CaMKII***-PSD ---PP1-active_CaMKII_PSD--> CaMKII-thr305-PSD      | 0.083333 #^-1.s^-1   | 0.8 s^-1  | 0.2 s^-1   | 2 uM      | 0.2 s^-1   | 4      |
| CaMKII-thr305-PSD ---PP1-active_CaMKII_PSD--> CaMKII-PSD         | 0.083333 #^-1.s^-1   | 0.8 s^-1  | 0.2 s^-1   | 2 uM      | 0.2 s^-1   | 4      |
| CaMKII-thr286 ---tot_CaM_CaMKII--> CaMKII***                     | 0.0024474 #^-1.s^-1  | 24 s^-1   | 6 s^-1     | 227 uM    | 6 s^-1     | 4      |
| CaMKII-CaM ---tot_CaM_CaMKII--> CaMKII-thr286*-CaM               | 0.00020395 #^-1.s^-1 | 2 s^-1    | 0.5 s^-1   | 227 uM    | 0.5 s^-1   | 4      |
| CaMKII-thr286 ---tot_autonomous_CaMKII--> CaMKII***              | 0.0015873 #^-1.s^-1  | 24 s^-1   | 6 s^-1     | 350 uM    | 6 s^-1     | 4      |
| CaMKII-CaM ---tot_autonomous_CaMKII--> CaMKII-thr286*-CaM        | 0.00013228 #^-1.s^-1 | 2 s^-1    | 0.5 s^-1   | 349.99 uM | 0.5 s^-1   | 4      |
| ATP ---AC1-CaM--> cAMP                                           | 0.0013889 #^-1.s^-1  | 18 s^-1   | 4.5 s^-1   | 300 uM    | 4.5 s^-1   | 4      |
| ATP ---AC2*--> cAMP                                              | 0.00061728 #^-1.s^-1 | 8 s^-1    | 2 s^-1     | 300 uM    | 2 s^-1     | 4      |
| cAMP ---cAMP-PDE--> AMP                                          | 0.046667 #^-1.s^-1   | 40 s^-1   | 10 s^-1    | 19.841 uM | 10 s^-1    | 4      |
| cAMP ---cAMP-PDE*--> AMP                                         | 0.093333 #^-1.s^-1   | 80 s^-1   | 20 s^-1    | 19.841 uM | 20 s^-1    | 4      |
| cAMP ---PDE1--> AMP                                              | 0.0038889 #^-1.s^-1  | 6.67 s^-1 | 1.667 s^-1 | 39.7 uM   | 1.667 s^-1 | 4.0012 |
| cAMP ---CaM.PDE1--> AMP                                          | 0.023333 #^-1.s^-1   | 40 s^-1   | 10 s^-1    | 39.683 uM | 10 s^-1    | 4      |

| Pools for group ###[]    | InitialConc  | buffered | Volume  |
|--------------------------|--------------|----------|---------|
| name                     |              |          |         |
| CaM-Ca4                  | 0 uM         | 0        | 0.09 fl |
| PP1-active               | 1.8 uM       | 0        | 0.09 fl |
| cAMP                     | 0 uM         | 0        | 0.09 fl |
| Ca                       | 0.08 uM      | 0        | 0.09 fl |
| PKA-active               | 0 uM         | 0        | 0.09 fl |
| CaM-Ca3                  | 0 uM         | 0        | 0.09 fl |
| CaM-TR2-Ca2              | 0 uM         | 0        | 0.09 fl |
| PP2A                     | 0.11111 uM   | 0        | 0.09 fl |
| CaNAB-Ca4                | 0 uM         | 0        | 0.09 fl |
| CaMKII-thr286-CaM-PSD    | 0 uM         | 0        | 0.01 fl |
| CaMKII-CaM-PSD           | 0 uM         | 0        | 0.01 fl |
| CaMKII-thr286-PSD        | 0 uM         | 0        | 0.01 fl |
| CaMKII-PSD               | 0 uM         | 0        | 0.01 fl |
| CaMKII***-PSD            | 0 uM         | 0        | 0.01 fl |
| tot-auto-PSD             | 2 uM         | 0        | 0.01 fl |
| CaM-TR2-Ca2-PSD          | 0 uM         | 0        | 0.01 fl |
| CaM-Ca3-PSD              | 0 uM         | 0        | 0.01 fl |
| CaM-Ca4-PSD              | 0 uM         | 0        | 0.01 fl |
| Ca-PSD                   | 0.08 uM      | 0        | 0.01 fl |
| 286P-PSD                 | 0 uM         | 0        | 0.01 fl |
| actCaMKII-PSD            | 2 uM         | 0        | 0.01 fl |
| tot_CaMKII_PSD           | 2 uM         | 0        | 0.01 fl |
| tot_CaMKII_cyt           | 22 uM        | 0        | 0.09 fl |
| PP1-active_PSD           | 4 uM         | 0        | 0.01 fl |
| PKC-active               | 0.1 uM       | 0        | 0.09 fl |
| temp-PIP2                | 2.5 uM       | 1        | 0.09 fl |
| I_845-P                  | 0 uM         | 0        | 0.09 fl |
| tot_L_GluR12             | 0 uM         | 0        | 0.09 fl |
| total_Int                | 0.096296 uM  | 0        | 0.09 fl |
| Ser845                   | 0 uM         | 0        | 0.01 fl |
| Ser845-P                 | 0 uM         | 0        | 0.01 fl |
| Ser845-PP                | 0 uM         | 0        | 0.01 fl |
| Ser831                   | 0 uM         | 0        | 0.01 fl |
| Ser831-P                 | 0 uM         | 0        | 0.01 fl |
| Ser831-PP                | 0 uM         | 0        | 0.01 fl |
| tot_mem_GluR12           | 0 uM         | 0        | 0.01 fl |
| act_CaMKII_cyt           | 2 uM         | 0        | 0.09 fl |
| NMDAR                    | 120 uM       | 0        | 0.01 fl |
| CaM_Ca_n-CaNAB           | 0 uM         | 0        | 0.09 fl |
| basal_CaMKII_cyt         | 2 uM         | 1        | 0.09 fl |
| basal_CaMKII_PSD         | 2 uM         | 0        | 0.01 fl |
| PKC-control              | 0.1 uM       | 1        | 0.09 fl |
| Ca_control_cyt           | 0.08 uM      | 1        | 0.09 fl |
| Ca_control_PSD           | 0.08 uM      | 1        | 0.01 fl |
| basal_CaMKII_PSD_control | 2 uM         | 1        | 0.01 fl |
| Anchor                   | 27.333 uM    | 0        | 0.01 fl |
| I_845                    | 0 uM         | 0        | 0.09 fl |
| I_845_PP                 | 0 uM         | 0        | 0.09 fl |
| tot-CaM-CaMKII-PSD       | 0 uM         | 0        | 0.01 fl |
| CaMKII-thr305-PSD        | 0 uM         | 0        | 0.01 fl |
| AMPA_bulk                | 0.0092593 uM | 1        | 5 fl    |
| PP1-active_CaMKII_PSD    | 2 uM         | 0        | 0.01 fl |
| CaMKII                   | 20 uM        | 0        | 0.09 fl |
| CaMKII-CaM               | 0 uM         | 0        | 0.09 fl |
| CaMKII-thr286*-CaM       | 0 uM         | 0        | 0.09 fl |
| CaMKII**                 | 0 uM         | 0        | 0.09 fl |
| CaMKII-thr286            | 0 uM         | 0        | 0.09 fl |
| tot_CaM_CaMKII           | 0 uM         | 0        | 0.09 fl |
| tot_autonomous_CaMKII    | 2 uM         | 0        | 0.09 fl |
| CaMK-thr305              | 0 uM         | 0        | 0.09 fl |
| CaM                      | 26.333 uM    | 0        | 0.09 fl |
| neurogranin-CaM          | 0 uM         | 0        | 0.09 fl |
| neurogranin*             | 0 uM         | 0        | 0.09 fl |
| neurogranin              | 10 uM        | 0        | 0.09 fl |
| CaM-PSD                  | 26.333 uM    | 0        | 0.01 fl |
| neurogranin-CaM_PSD      | 0 uM         | 0        | 0.01 fl |
| neurogranin_PSD          | 10 uM        | 0        | 0.01 fl |
| neurogranin*_PSD         | 0 uM         | 0        | 0.01 fl |
| I1                       | 1.8 uM       | 0        | 0.09 fl |
| I1*                      | 0 uM         | 0        | 0.09 fl |
| PP1-I1*                  | 0 uM         | 0        | 0.09 fl |
| PP1-I1                   | 0 uM         | 0        | 0.09 fl |
| CaNAB                    | 1 uM         | 0        | 0.09 fl |
| CaNAB-Ca2                | 0 uM         | 0        | 0.09 fl |
| R2C2                     | 0.5 uM       | 0        | 0.09 fl |
| R2C2-cAMP                | 0 uM         | 0        | 0.09 fl |
| R2C2-cAMP2               | 0 uM         | 0        | 0.09 fl |
| R2C2-cAMP3               | 0 uM         | 0        | 0.09 fl |
| R2C2-cAMP4               | 0 uM         | 0        | 0.09 fl |
| R2C-cAMP4                | 0 uM         | 0        | 0.09 fl |
| R2-cAMP4                 | 0 uM         | 0        | 0.09 fl |
| PKA-inhibitor            | 0.25926 uM   | 0        | 0.09 fl |
| inhibited-PKA            | 0 uM         | 0        | 0.09 fl |
| ATP                      | 2000 uM      | 1        | 0.09 fl |
| AC1-CaM                  | 0 uM         | 0        | 0.09 fl |
| AC1                      | 0.074074 uM  | 0        | 0.09 fl |
| AC2*                     | 0 uM         | 0        | 0.09 fl |
| AC2                      | 0.074074 uM  | 0        | 0.09 fl |
| AMP                      | 0 uM         | 0        | 0.09 fl |
| cAMP-PDE                 | 0.55556 uM   | 0        | 0.09 fl |

|                     |             |   |         |
|---------------------|-------------|---|---------|
| cAMP-PDE*           | 0 uM        | 0 | 0.09 fl |
| PDE1                | 2.5926 uM   | 0 | 0.09 fl |
| CaM.PDE1            | 0 uM        | 0 | 0.09 fl |
| cAMP_in_dend        | 0 uM        | 0 | 5 fl    |
| I1                  | 4 uM        | 0 | 0.01 fl |
| I1*                 | 0 uM        | 0 | 0.01 fl |
| PP1-I1*             | 0 uM        | 0 | 0.01 fl |
| PP1-I1              | 0 uM        | 0 | 0.01 fl |
| GluR23_M            | 3.5 uM      | 0 | 0.01 fl |
| GluR23_I            | 0.092593 uM | 0 | 0.09 fl |
| total_mem           | 3.4667 uM   | 0 | 0.01 fl |
| AMPAR_deg           | 0 uM        | 1 | 0.09 fl |
| A_B                 | 0 uM        | 0 | 0.09 fl |
| A831*_B             | 0 uM        | 0 | 0.09 fl |
| A845*_B             | 0 uM        | 0 | 0.09 fl |
| A831*845*_B         | 0 uM        | 0 | 0.09 fl |
| A_B845*             | 0 uM        | 0 | 0.09 fl |
| AA831*_B845*        | 0 uM        | 0 | 0.09 fl |
| A845*_B845*         | 0 uM        | 0 | 0.09 fl |
| A831*845*_B845*     | 0 uM        | 0 | 0.09 fl |
| A845*_B831*845*     | 0 uM        | 0 | 0.09 fl |
| A835*845*_B835*845* | 0 uM        | 0 | 0.09 fl |
| A_B831*845*         | 0 uM        | 0 | 0.09 fl |
| A831*_B831*845*     | 0 uM        | 0 | 0.09 fl |
| A_B831*             | 0 uM        | 0 | 0.09 fl |
| A845*_B831*         | 0 uM        | 0 | 0.01 fl |
| A831*_B831*         | 0 uM        | 0 | 0.09 fl |
| A831*845*_B831*     | 0 uM        | 0 | 0.09 fl |
| A_B                 | 0 uM        | 0 | 0.01 fl |
| A831*_B             | 0 uM        | 0 | 0.01 fl |
| A_B831*             | 0 uM        | 0 | 0.01 fl |
| A831*_B831*         | 0 uM        | 0 | 0.01 fl |
| A845*_B             | 0 uM        | 0 | 0.01 fl |
| A831*845*_B         | 0 uM        | 0 | 0.01 fl |
| A831*845*_B831*     | 0 uM        | 0 | 0.01 fl |
| A_B845*             | 0 uM        | 0 | 0.01 fl |
| A845*_B831*         | 0 uM        | 0 | 0.01 fl |
| A845*_B845*         | 0 uM        | 0 | 0.01 fl |
| A831*_B845*         | 0 uM        | 0 | 0.01 fl |
| A_B831*845*         | 0 uM        | 0 | 0.01 fl |
| A831*_B831*845*     | 0 uM        | 0 | 0.01 fl |
| A831*845*_B845*     | 0 uM        | 0 | 0.01 fl |
| A845*_B831*845*     | 0 uM        | 0 | 0.01 fl |
| A835*845*_B835*845* | 0 uM        | 0 | 0.01 fl |
